# Supplementary material for: Proteomic Analyses of the G Protein-Coupled Estrogen Receptor GPER1 Reveal Constitutive Links to Endoplasmic Reticulum, Glycosylation, Trafficking, and Calcium Signaling
Source: Cells. 2023 Nov 3;12(21):2571. doi: 10.3390/cells12212571 (PMC10650109; doi:10.3390/cells12212571)
Supplement: Supplementary file 1 [file cells-12-02571-s001.zip]

Archive with 4 entries (4 files):
- Supplementary Materials.pdf
- Supplementary Table S1.xlsx
- Supplementary Table S2.xlsx
- Supplementary Table S3.xlsx
