# Supplementary material for: Proteomic Analyses of the G Protein-Coupled Estrogen Receptor GPER1 Reveal Constitutive Links to Endoplasmic Reticulum, Glycosylation, Trafficking, and Calcium Signaling
Source: Cells. 2023 Nov 3;12(21):2571. doi: 10.3390/cells12212571 (PMC10650109; doi:10.3390/cells12212571)
Supplement: Supplementary file 1 [file cells-12-02571-s001.zip › Supplementary Table S1.xlsx]

## Sheet: Maryam_14448-14604_Perseus_M2
Log2 LFQ intensity 14448	Log2 LFQ intensity 14517	LFQ intensity 14602	Log2 LFQ intensity 14449	Log2 LFQ intensity 14518	Log2 LFQ intensity 14603	Log2 LFQ intensity 14450	Log2 LFQ intensity 14519	Log2 LFQ intensity 14604	Student's T-test Significant GPR30-E2_GPR30	Fold change GPR30-E2_GPR30 (with imputation)	Student's T-test Significant GPR30-E2_NES	Fold change GPR30-E2_NES (with imputation)	Student's T-test Significant GPR30_NES	Fold change GPR30_NES (with imputation)	Student's T-test significant	Student's T-test p-value GPR30-E2_GPR30	Student's T-test q-value GPR30-E2_GPR30	Student's T-test Difference GPR30-E2_GPR30	Student's T-test Test statistic GPR30-E2_GPR30	Student's T-test p-value GPR30-E2_NES	Student's T-test q-value GPR30-E2_NES	Student's T-test Difference GPR30-E2_NES	Student's T-test Test statistic GPR30-E2_NES	Student's T-test p-value GPR30_NES	Student's T-test q-value GPR30_NES	Student's T-test Difference GPR30_NES	Student's T-test Test statistic GPR30_NES	Peptides	Razor + unique peptides	Unique peptides	Mol. weight [kDa]	Score	Intensity	MS/MS count	MS/MS count 14448	MS/MS count 14517	MS/MS count 14602	MS/MS count 14449	MS/MS count 14518	MS/MS count 14603	MS/MS count 14450	MS/MS count 14519	MS/MS count 14604	Majority protein IDs	Protein names	Gene names	Fasta headers	GOBP name	GOMF name
GPR30	GPR30	GPR30	GPR30-E2	GPR30-E2	GPR30-E2	NES	NES	NES
31.0807	31.1111	31.0817	31.0908	31.0441	31.204	31.1687	31.3126	31.2706		1.01523		0.908985		0.895347		0.676157	1	0.0218093	0.449794	0.0973002	0.179878	-0.137672	-2.15622	0.0220579	0.0804744	-0.159481	-3.63521	193	193	193	532.4	323.31	27328000000	1396	132	149	147	147	134	154	166	193	174	Q14204;A0A7P0T9C4;A0A7P0TA13;A0A2R8Y5T0;A0A2R8Y706;A0A7P0T9R4;A0A7P0TAW9;A0A7P0T7V5;A0A7P0T916;A0A7P0T8N2;A0A7P0TBJ7;A0A7P0TAF3;A0A7P0TB75;A0A2R8Y6H2;A0A7P0T9K2;A0A7P0T9F1;A0A7P0T8W5;A0A2R8YFZ7;A0A7P0TAM4;A0A7P0T825;A0A7P0TB64;A0A7P0TAV5;A0A7P0T990;A0A804HHY6;A0A7P0T942;A0A2R8YGC7	Cytoplasmic dynein 1 heavy chain 1	DYNC1H1	sp|Q14204|DYHC1_HUMAN Cytoplasmic dynein 1 heavy chain 1 OS=Homo sapiens OX=9606 GN=DYNC1H1 PE=1 SV=5;tr|A0A7P0T9C4|A0A7P0T9C4_HUMAN Cytoplasmic dynein 1 heavy chain 1 OS=Homo sapiens OX=9606 GN=DYNC1H1 PE=1 SV=1;tr|A0A7P0TA13|A0A7P0TA13_HUMAN Cytoplasmic	antigen processing and presentation;antigen processing and presentation of exogenous antigen;antigen processing and presentation of exogenous peptide antigen;antigen processing and presentation of exogenous peptide antigen via MHC class II;antigen processing and presentation of peptide antigen;antigen processing and presentation of peptide antigen via MHC class II;antigen processing and presentat…	adenyl nucleotide binding;adenyl ribonucleotide binding;ATP binding;ATPase activity;binding;catalytic activity;hydrolase activity;hydrolase activity, acting on acid anhydrides;hydrolase activity, acting on acid anhydrides, in phosphorus-containing anhydrides;microtubule motor activity;motor activity;nucleoside-triphosphatase activity;nucleotide binding;purine nucleotide binding;purine ribonucleos…
31.5546	31.6132	31.7205	31.7606	31.7574	31.704	31.5046	31.4468	31.3499		1.08014	+	1.23706		1.14528	GPR30-E2_NES	0.0989218	1	0.111223	2.14149	0.00324405	0.0219048	0.306921	6.30024	0.0418983	0.122782	0.195698	2.95171	176	176	176	469.08	323.31	35264000000	1232	134	112	151	144	125	146	144	127	149	P78527	DNA-dependent protein kinase catalytic subunit	PRKDC	sp|P78527|PRKDC_HUMAN DNA-dependent protein kinase catalytic subunit OS=Homo sapiens OX=9606 GN=PRKDC PE=1 SV=3	anatomical structure development;anatomical structure formation involved in morphogenesis;anatomical structure homeostasis;anterior/posterior pattern specification;B cell lineage commitment;biological regulation;brain development;cell activation;cell death;cell differentiation;cell fate commitment;cellular component organization;cellular component organization at cellular level;cellular component…	adenyl nucleotide binding;adenyl ribonucleotide binding;ATP binding;binding;catalytic activity;DNA binding;DNA-dependent protein kinase activity;kinase activity;nucleic acid binding;nucleotide binding;phosphotransferase activity, alcohol group as acceptor;protein binding;protein kinase activity;protein serine/threonine kinase activity;purine nucleotide binding;purine ribonucleoside triphosphate b…
29.2854	29.4361	29.5506	29.392	29.2109	29.2442	30.1436	30.4072	30.3406		0.906477	+	0.49491	+	0.545971	GPR30_NES;GPR30-E2_NES	0.209554	1	-0.141658	-1.4937	0.000467165	0.00617219	-1.01476	-10.4882	0.0013774	0.0164522	-0.873105	-7.91706	159	159	30	531.78	323.31	11195000000	756	70	73	79	75	59	61	105	113	121	Q15149	Plectin	PLEC	sp|Q15149|PLEC_HUMAN Plectin OS=Homo sapiens OX=9606 GN=PLEC PE=1 SV=3	apoptosis;cell death;cell junction assembly;cell junction organization;cell-substrate junction assembly;cellular component assembly;cellular component assembly at cellular level;cellular component disassembly;cellular component disassembly at cellular level;cellular component disassembly involved in apoptosis;cellular component organization;cellular component organization at cellular level;cellul…	ankyrin binding;binding;cytoskeletal protein binding;protein binding;structural constituent of muscle;structural molecule activity
29.388	29.6951	29.6039	29.1431	29.0186	29.1471	31.2362	31.5369	31.5808		0.727292	+	0.196373	+	0.270005	GPR30_NES;GPR30-E2_NES	0.0101965	1	-0.459393	-4.57831	3.54042e-05	0	-2.34833	-20.2074	0.000181919	0.00261538	-1.88894	-13.3522	135	135	1	284.54	323.31	20234000000	753	56	77	65	59	52	54	120	130	140	Q13813	Spectrin alpha chain, non-erythrocytic 1	SPTAN1	sp|Q13813|SPTN1_HUMAN Spectrin alpha chain, non-erythrocytic 1 OS=Homo sapiens OX=9606 GN=SPTAN1 PE=1 SV=3	actin filament capping;apoptosis;axon guidance;biological regulation;cell death;cellular component disassembly;cellular component disassembly at cellular level;cellular component disassembly involved in apoptosis;cellular component organization;cellular component organization at cellular level;cellular component organization or biogenesis;cellular component organization or biogenesis at cellular …	actin binding;binding;calcium ion binding;cation binding;cytoskeletal protein binding;ion binding;metal ion binding;protein binding;structural constituent of cytoskeleton;structural molecule activity
31.2719	31.2235	31.5164	31.1928	31.2623	31.4328	31.4864	31.6374	31.8831		0.971756		0.772155		0.794598		0.738145	1	-0.0413342	-0.35842	0.051564	0.118148	-0.373037	-2.74642	0.0868667	0.191395	-0.331703	-2.25806	133	133	90	358.2	323.31	33800000000	1040	101	105	111	115	100	109	142	112	145	P49792	E3 SUMO-protein ligase RanBP2	RANBP2	sp|P49792|RBP2_HUMAN E3 SUMO-protein ligase RanBP2 OS=Homo sapiens OX=9606 GN=RANBP2 PE=1 SV=2	biological regulation;biosynthetic process;carbohydrate metabolic process;carbohydrate transport;cell cycle;cell cycle process;cell surface receptor linked signaling pathway;cellular biosynthetic process;cellular component disassembly;cellular component disassembly at cellular level;cellular component organization;cellular component organization at cellular level;cellular component organization o…	binding;catalytic activity;cation binding;cis-trans isomerase activity;enzyme binding;GTPase binding;ion binding;isomerase activity;ligase activity;metal ion binding;nucleic acid binding;peptidyl-prolyl cis-trans isomerase activity;protein binding;Ran GTPase binding;Ras GTPase binding;RNA binding;small GTPase binding;transition metal ion binding;zinc ion binding
28.6881	28.8747	28.9039	28.4306	28.3859	28.7727	29.6351	29.6202	30.0201		0.816491	+	0.42669	+	0.52259	GPR30_NES;GPR30-E2_NES	0.104229	1	-0.292492	-2.0951	0.00236037	0.0181453	-1.22874	-6.86307	0.00314053	0.0255196	-0.936249	-6.35576	133	133	132	376.01	323.31	7778400000	618	49	61	63	47	44	52	93	99	110	Q14789;E7EU81	Golgin subfamily B member 1	GOLGB1	sp|Q14789|GOGB1_HUMAN Golgin subfamily B member 1 OS=Homo sapiens OX=9606 GN=GOLGB1 PE=1 SV=2;tr|E7EU81|E7EU81_HUMAN Golgin subfamily B member 1 (Fragment) OS=Homo sapiens OX=9606 GN=GOLGB1 PE=1 SV=1	cellular component organization;cellular component organization at cellular level;cellular component organization or biogenesis;cellular component organization or biogenesis at cellular level;cellular process;Golgi organization;organelle organization
28.6008	28.7397	28.795	28.8058	29.0071	28.7443	28.5223	28.6614	28.6879		1.10233		1.17164		1.06287		0.22542	1	0.140562	1.43196	0.0729494	0.146091	0.228525	2.41764	0.318567	0.472264	0.0879631	1.13824	130	130	130	632.81	323.31	4855900000	640	69	55	80	67	78	70	73	68	80	Q9NU22	Midasin	MDN1	sp|Q9NU22|MDN1_HUMAN Midasin OS=Homo sapiens OX=9606 GN=MDN1 PE=1 SV=2	cellular component assembly;cellular component organization;cellular component organization or biogenesis;macromolecular complex assembly;macromolecular complex subunit organization;metabolic process;protein complex assembly;protein complex subunit organization	adenyl nucleotide binding;adenyl ribonucleotide binding;ATP binding;ATPase activity;binding;catalytic activity;hydrolase activity;hydrolase activity, acting on acid anhydrides;hydrolase activity, acting on acid anhydrides, in phosphorus-containing anhydrides;nucleoside-triphosphatase activity;nucleotide binding;protein binding;purine nucleotide binding;purine ribonucleoside triphosphate binding;p…
28.9522	29.1955	29.3084	28.7308	28.9079	29.0602	30.7759	31.1012	31.0718		0.839469	+	0.235965	+	0.281088	GPR30_NES;GPR30-E2_NES	0.149616	1	-0.252451	-1.78039	0.000121777	0.00435897	-2.08336	-14.7865	0.000243956	0.00344828	-1.83091	-12.3895	124	124	114	274.61	323.31	15370000000	665	45	57	64	41	47	53	105	133	120	Q01082;A0A087WUZ3	Spectrin beta chain, non-erythrocytic 1	SPTBN1	sp|Q01082|SPTB2_HUMAN Spectrin beta chain, non-erythrocytic 1 OS=Homo sapiens OX=9606 GN=SPTBN1 PE=1 SV=2;tr|A0A087WUZ3|A0A087WUZ3_HUMAN Spectrin beta chain OS=Homo sapiens OX=9606 GN=SPTBN1 PE=1 SV=1	actin filament capping;axon guidance;biological regulation;cell cycle cytokinesis;cell cycle process;cellular component assembly;cellular component assembly at cellular level;cellular component organization;cellular component organization at cellular level;cellular component organization or biogenesis;cellular component organization or biogenesis at cellular level;cellular macromolecule metabolic…	actin binding;ankyrin binding;binding;cytoskeletal protein binding;enzyme binding;GTPase binding;lipid binding;phospholipid binding;protein binding;structural constituent of cytoskeleton;structural molecule activity
30.3416	30.3385	30.0465	30.2439	30.3648	29.8418	30.0026	30.119	30.3387		0.938204		0.997719		1.06343		0.646593	1	-0.0920264	-0.494944	0.986734	0.992865	-0.00329526	-0.0176889	0.557629	0.716604	0.0887311	0.638916	122	122	122	331.77	323.31	13541000000	737	67	81	83	77	73	79	85	88	104	P15924	Desmoplakin	DSP	P15924 SWISS-PROT:DESP_HUMAN Desmoplakin	adherens junction organization;anatomical structure development;anatomical structure morphogenesis;apoptosis;cardiac muscle tissue morphogenesis;cell death;cell differentiation;cell junction organization;cell-cell junction organization;cellular component disassembly;cellular component disassembly at cellular level;cellular component disassembly involved in apoptosis;cellular component organizatio…	binding;binding, bridging;enzyme binding;kinase binding;protein binding;protein binding, bridging;protein kinase binding;protein kinase C binding;scaffold protein binding;structural constituent of cytoskeleton;structural molecule activity
30.3027	30.5571	30.3683	30.1376	30.191	30.2423	31.3183	31.604	31.3425		0.859119	+	0.425935	+	0.495781	GPR30_NES;GPR30-E2_NES	0.055767	1	-0.21907	-2.67067	0.000215778	0.00396364	-1.23129	-12.7837	0.00105022	0.0168542	-1.01222	-8.50076	113	113	1	278.16	323.31	23718000000	768	73	86	75	64	73	72	110	111	104	O75369;E7EN95	Filamin-B	FLNB	sp|O75369|FLNB_HUMAN Filamin-B OS=Homo sapiens OX=9606 GN=FLNB PE=1 SV=2;tr|E7EN95|E7EN95_HUMAN Filamin-B OS=Homo sapiens OX=9606 GN=FLNB PE=1 SV=1	actin cytoskeleton organization;actin filament-based process;anatomical structure development;biological regulation;cell differentiation;cell surface receptor linked signaling pathway;cellular component organization;cellular component organization at cellular level;cellular component organization or biogenesis;cellular component organization or biogenesis at cellular level;cellular developmental …	actin binding;binding;cytoskeletal protein binding;identical protein binding;protein binding
31.5614	33.0128	31.2339	31.4702	32.4039	31.3681	30.62	32.1753	30.2581		0.877456		1.65818		1.88976		0.782327	1	-0.188601	-0.295485	0.340014	0.46493	0.729605	1.08227	0.316574	0.470952	0.918206	1.14362	104	104	92	265.55	323.31	38188000000	875	93	122	95	92	101	85	84	122	81	Q13085	Acetyl-CoA carboxylase 1;Biotin carboxylase	ACACA	sp|Q13085|ACACA_HUMAN Acetyl-CoA carboxylase 1 OS=Homo sapiens OX=9606 GN=ACACA PE=1 SV=2	acetyl-CoA metabolic process;acyl-CoA biosynthetic process;acyl-CoA metabolic process;acylglycerol biosynthetic process;acylglycerol metabolic process;amine transport;amino acid transmembrane transport;amino acid transport;anatomical structure homeostasis;betaine transport;biological regulation;biosynthetic process;biotin metabolic process;carboxylic acid biosynthetic process;carboxylic acid meta…	acetyl-CoA carboxylase activity;adenyl nucleotide binding;adenyl ribonucleotide binding;ATP binding;binding;biotin carboxylase activity;catalytic activity;cation binding;CoA carboxylase activity;ion binding;ligase activity;ligase activity, forming carbon-carbon bonds;ligase activity, forming carbon-nitrogen bonds;metal ion binding;nucleotide binding;purine nucleotide binding;purine ribonucleoside…
31.711	31.9545	31.76	31.4612	31.5243	31.5453	32.8425	32.9335	32.8368		0.813237	+	0.389394	+	0.47882	GPR30_NES;GPR30-E2_NES	0.0191153	1	-0.298251	-3.79929	4.55367e-06	0	-1.3607	-33.8311	0.000191861	0.00255	-1.06245	-13.1724	103	98	85	280.74	323.31	62365000000	931	94	93	91	95	83	87	125	133	130	P21333;Q60FE5;A0A7P0NMY4	Filamin-A	FLNA	sp|P21333|FLNA_HUMAN Filamin-A OS=Homo sapiens OX=9606 GN=FLNA PE=1 SV=4;tr|Q60FE5|Q60FE5_HUMAN Filamin-A OS=Homo sapiens OX=9606 GN=FLNA PE=1 SV=1;tr|A0A7P0NMY4|A0A7P0NMY4_HUMAN Filamin-A OS=Homo sapiens OX=9606 GN=FLNA PE=1 SV=1	actin crosslink formation;actin cytoskeleton organization;actin cytoskeleton reorganization;actin filament organization;actin filament-based process;anatomical structure formation involved in morphogenesis;anatomical structure morphogenesis;biological adhesion;biological regulation;biosynthetic process;blood coagulation;cAMP-mediated signaling;cell activation;cell adhesion;cell cycle process;cell…	actin binding;actin filament binding;binding;cytoskeletal protein binding;enzyme binding;Fc-gamma receptor I complex binding;glycoprotein binding;GTPase binding;identical protein binding;immunoglobulin receptor binding;molecular transducer activity;protein binding;protein dimerization activity;protein homodimerization activity;Rac GTPase binding;Ral GTPase binding;Ras GTPase binding;receptor bind…
29.1598	29.0389	29.6188	29.1031	28.9318	29.3529	29.4442	29.3727	29.8151		0.905481		0.750174		0.828481		0.541355	1	-0.143244	-0.666866	0.0869347	0.166707	-0.414703	-2.25735	0.291494	0.443084	-0.271459	-1.21408	101	101	101	358.69	323.31	7390500000	578	47	52	83	52	49	79	68	59	89	P46013	Antigen KI-67	MKI67	sp|P46013|KI67_HUMAN Proliferation marker protein Ki-67 OS=Homo sapiens OX=9606 GN=MKI67 PE=1 SV=2	cell cycle phase;cell cycle process;cell proliferation;cellular process;meiosis	adenyl nucleotide binding;adenyl ribonucleotide binding;ATP binding;binding;nucleotide binding;protein binding;protein C-terminus binding;purine nucleotide binding;purine ribonucleoside triphosphate binding;purine ribonucleotide binding;ribonucleotide binding
27.9882	27.9833	28.0771	27.825	28.0214	28.0926	28.0161	27.9381	28.1366		0.974992		0.965529		0.990294		0.691564	1	-0.0365372	-0.426695	0.635045	0.777383	-0.050609	-0.512904	0.839896	0.916138	-0.0140718	-0.215533	100	100	2	520.04	323.31	2943300000	485	50	44	68	48	37	58	63	56	61	A0A499FJI4;A0A804HL12;O75592;A0A804HJ25	E3 ubiquitin-protein ligase MYCBP2	MYCBP2	tr|A0A499FJI4|A0A499FJI4_HUMAN RCR-type E3 ubiquitin transferase OS=Homo sapiens OX=9606 GN=MYCBP2 PE=1 SV=2;tr|A0A804HL12|A0A804HL12_HUMAN E3 ubiquitin-protein ligase MYCBP2 OS=Homo sapiens OX=9606 GN=MYCBP2 PE=4 SV=1;sp|O75592|MYCB2_HUMAN E3 ubiquitin-pr	anatomical structure morphogenesis;axon guidance;axonogenesis;biological regulation;biosynthetic process;branchiomotor neuron axon guidance;cell part morphogenesis;cell projection morphogenesis;cell projection organization;cellular biosynthetic process;cellular component morphogenesis;cellular component organization;cellular component organization at cellular level;cellular component organization…	acid-amino acid ligase activity;binding;catalytic activity;cation binding;ion binding;ligase activity;ligase activity, forming carbon-nitrogen bonds;metal ion binding;small conjugating protein ligase activity;transition metal ion binding;ubiquitin-protein ligase activity;zinc ion binding
30.0774	30.4991	30.2432	30.223	30.1756	30.1852	30.7119	30.9373	30.8469		0.946933	+	0.642839		0.678865	GPR30-E2_NES	0.558859	1	-0.0786654	-0.636827	0.000683073	0.0115936	-0.63747	-9.50778	0.0158824	0.0638645	-0.558804	-4.01864	100	100	82	226.53	323.31	18113000000	717	62	74	82	69	65	66	96	101	102	P35579	Myosin-9	MYH9	sp|P35579|MYH9_HUMAN Myosin-9 OS=Homo sapiens OX=9606 GN=MYH9 PE=1 SV=4	actin cytoskeleton organization;actin cytoskeleton reorganization;actin filament-based movement;actin filament-based process;actomyosin structure organization;anatomical structure formation involved in morphogenesis;angiogenesis;axon guidance;biological adhesion;biological regulation;blood vessel endothelial cell migration;cell adhesion;cell cycle process;cell differentiation;cell migration;cell …	actin binding;actin filament binding;actin-dependent ATPase activity;adenyl nucleotide binding;adenyl ribonucleotide binding;ADP binding;ATP binding;ATPase activity;ATPase activity, coupled;binding;catalytic activity;cytoskeletal protein binding;hydrolase activity;hydrolase activity, acting on acid anhydrides;hydrolase activity, acting on acid anhydrides, in phosphorus-containing anhydrides;ident…
29.5115	29.4958	29.6014	29.5848	29.2152	29.4526	30.2854	30.2484	30.4671		0.920995	+	0.529927	+	0.575385	GPR30_NES;GPR30-E2_NES	0.352675	1	-0.118734	-1.05072	0.00198729	0.016012	-0.916134	-7.18535	0.000447146	0.00916239	-0.7974	-10.6072	99	86	80	229	323.31	11961000000	573	51	60	60	55	48	52	70	87	90	P35580	Myosin-10	MYH10	sp|P35580|MYH10_HUMAN Myosin-10 OS=Homo sapiens OX=9606 GN=MYH10 PE=1 SV=3	actin cytoskeleton organization;actin filament-based movement;actin filament-based process;actomyosin structure organization;adult heart development;anatomical structure development;anatomical structure formation involved in morphogenesis;axon guidance;biological adhesion;biological regulation;cardiac cell development;cardiac muscle cell development;cardiac myofibril assembly;cell adhesion;cell c…	actin binding;actin filament binding;actin-dependent ATPase activity;adenyl nucleotide binding;adenyl ribonucleotide binding;ADP binding;ATP binding;ATPase activity;ATPase activity, coupled;binding;catalytic activity;cytoskeletal protein binding;hydrolase activity;hydrolase activity, acting on acid anhydrides;hydrolase activity, acting on acid anhydrides, in phosphorus-containing anhydrides;micro…
29.0768	28.8803	28.6641	29.0108	28.9753	28.8545	28.7768	28.8248	28.6758		1.052		1.13897		1.08267		0.598984	1	0.0731322	0.570295	0.0437491	0.105288	0.187726	2.90838	0.417979	0.579578	0.114594	0.902172	99	99	99	292.75	323.31	5413400000	526	55	53	60	62	52	61	59	57	67	Q92616	Translational activator GCN1	GCN1L1	sp|Q92616|GCN1_HUMAN eIF-2-alpha kinase activator GCN1 OS=Homo sapiens OX=9606 GN=GCN1 PE=1 SV=6	biological regulation;biosynthetic process;cellular biosynthetic process;cellular macromolecule biosynthetic process;cellular macromolecule metabolic process;cellular metabolic process;cellular process;cellular protein metabolic process;macromolecule biosynthetic process;macromolecule metabolic process;metabolic process;posttranscriptional regulation of gene expression;primary metabolic process;p…	binding;nucleic acid binding;RNA binding;translation factor activity, nucleic acid binding
32.0511	32.3105	32.0941	32.0011	32.2436	32.1129	31.8	32.2134	31.9061		0.977604		1.10653		1.13188		0.774389	1	-0.032678	-0.306679	0.362994	0.489153	0.146039	1.02573	0.292795	0.444438	0.178717	1.21029	98	98	98	273.42	323.31	51707000000	907	98	99	94	94	95	104	104	111	108	P49327;A0A0U1RQF0	Fatty acid synthase;[Acyl-carrier-protein] S-acetyltransferase;[Acyl-carrier-protein] S-malonyltransferase;3-oxoacyl-[acyl-carrier-protein] synthase;3-oxoacyl-[acyl-carrier-protein] reductase;3-hydroxyacyl-[acyl-carrier-protein] dehydratase;Enoyl-[acyl-carrier-protein] reductase;Oleoyl-[acyl-carrier-protein] hydrolase	FASN	sp|P49327|FAS_HUMAN Fatty acid synthase OS=Homo sapiens OX=9606 GN=FASN PE=1 SV=3;tr|A0A0U1RQF0|A0A0U1RQF0_HUMAN 3-hydroxyacyl-[acyl-carrier-protein] dehydratase OS=Homo sapiens OX=9606 GN=FASN PE=1 SV=1	acetyl-CoA metabolic process;acyl-CoA biosynthetic process;acyl-CoA metabolic process;acylglycerol biosynthetic process;acylglycerol metabolic process;amine metabolic process;biological regulation;biosynthetic process;carboxylic acid biosynthetic process;carboxylic acid metabolic process;cell differentiation;cellular amine metabolic process;cellular amino acid metabolic process;cellular biosynthe…	[acyl-carrier-protein] S-acetyltransferase activity;[acyl-carrier-protein] S-malonyltransferase activity;3-hydroxyacyl-[acyl-carrier-protein] dehydratase activity;3-hydroxyoctanoyl-[acyl-carrier-protein] dehydratase activity;3-hydroxypalmitoyl-[acyl-carrier-protein] dehydratase activity;3-oxoacyl-[acyl-carrier-protein] reductase (NADPH) activity;3-oxoacyl-[acyl-carrier-protein] synthase activity;…
25.1681	25.3517	24.839	24.5314	24.4286	24.7805	26.5325	27.4347	27.5608		0.68803	+	0.165415	+	0.240418	GPR30_NES;GPR30-E2_NES	0.0419054	1	-0.539457	-2.95153	0.00158478	0.0144966	-2.59584	-7.62962	0.00449926	0.0296216	-2.05638	-5.76266	95	94	0	856.87	323.31	1025600000	229	16	15	14	10	9	14	39	52	60	H3BPE1;H3BQK9;A0A7P0MQR8		MACF1	tr|H3BPE1|H3BPE1_HUMAN Microtubule-actin cross-linking factor 1, isoforms 1/2/3/5 OS=Homo sapiens OX=9606 GN=MACF1 PE=1 SV=1;tr|H3BQK9|H3BQK9_HUMAN Microtubule-actin cross-linking factor 1, isoforms 1/2/3/5 OS=Homo sapiens OX=9606 GN=MACF1 PE=1 SV=1;tr|A0A	biological regulation;cell cycle arrest;cell cycle process;cell surface receptor linked signaling pathway;cellular process;cellular response to stimulus;negative regulation of biological process;negative regulation of cell cycle;negative regulation of cellular process;regulation of biological process;regulation of cell cycle;regulation of cellular process;response to stimulus;signal transduction;…	ATPase activity;binding;calcium ion binding;catalytic activity;cation binding;hydrolase activity;hydrolase activity, acting on acid anhydrides;hydrolase activity, acting on acid anhydrides, in phosphorus-containing anhydrides;ion binding;metal ion binding;nucleoside-triphosphatase activity;pyrophosphatase activity
30.0458	30.0341	29.8493	30.0057	30.0554	30.0559	30.0526	30.241	30.0837		1.04436		0.941638		0.901641		0.394997	1	0.0626202	0.952021	0.225891	0.335807	-0.0867551	-1.43019	0.158589	0.28905	-0.149375	-1.73051	95	95	95	290.46	323.31	12624000000	628	66	68	63	69	60	69	77	72	84	Q93008	Probable ubiquitin carboxyl-terminal hydrolase FAF-X	USP9X	sp|Q93008|USP9X_HUMAN Probable ubiquitin carboxyl-terminal hydrolase FAF-X OS=Homo sapiens OX=9606 GN=USP9X PE=1 SV=4	anatomical structure arrangement;anatomical structure development;axon extension;biological regulation;biosynthetic process;BMP signaling pathway;catabolic process;cell cycle phase;cell cycle process;cell division;cell growth;cell migration;cell motility;cell surface receptor linked signaling pathway;cellular biosynthetic process;cellular catabolic process;cellular component movement;cellular com…	binding;catalytic activity;co-SMAD binding;cysteine-type endopeptidase activity;cysteine-type peptidase activity;endopeptidase activity;hydrolase activity;peptidase activity;peptidase activity, acting on L-amino acid peptides;protein binding;SMAD binding;small conjugating protein-specific protease activity;ubiquitin-specific protease activity
32.0445	32.0502	31.8351	32.0711	32.0143	31.8337	32.7066	32.9548	32.7187		0.997538	+	0.566305	+	0.567703	GPR30_NES;GPR30-E2_NES	0.973507	1	-0.00355593	-0.0353336	0.00160727	0.0143522	-0.820348	-7.60126	0.00160446	0.0177052	-0.816792	-7.60478	93	93	73	192.06	323.31	66614000000	898	98	92	87	95	78	86	123	126	113	A0A087WVQ6;Q00610	Clathrin heavy chain;Clathrin heavy chain 1	CLTC	tr|A0A087WVQ6|A0A087WVQ6_HUMAN Clathrin heavy chain OS=Homo sapiens OX=9606 GN=CLTC PE=1 SV=1;sp|Q00610|CLH1_HUMAN Clathrin heavy chain 1 OS=Homo sapiens OX=9606 GN=CLTC PE=1 SV=5	antigen processing and presentation;antigen processing and presentation of exogenous antigen;antigen processing and presentation of exogenous peptide antigen;antigen processing and presentation of exogenous peptide antigen via MHC class II;antigen processing and presentation of peptide antigen;antigen processing and presentation of peptide antigen via MHC class II;antigen processing and presentat…	binding;clathrin binding;clathrin light chain binding;double-stranded RNA binding;enzyme binding;kinase binding;nucleic acid binding;protein binding;protein kinase binding;RNA binding;structural molecule activity
27.7616	27.922	27.4561	27.8768	27.862	27.6779	27.9677	28.2122	27.7762		1.0661		0.882807		0.828069		0.573564	1	0.0923468	0.612086	0.27256	0.38665	-0.179831	-1.27117	0.21722	0.361002	-0.272177	-1.4633	91	91	91	573.83	323.31	2922900000	438	50	42	45	47	40	43	58	61	52	Q5T4S7	E3 ubiquitin-protein ligase UBR4	UBR4	sp|Q5T4S7|UBR4_HUMAN E3 ubiquitin-protein ligase UBR4 OS=Homo sapiens OX=9606 GN=UBR4 PE=1 SV=1	cellular macromolecule metabolic process;cellular metabolic process;cellular process;cellular protein metabolic process;macromolecule metabolic process;macromolecule modification;metabolic process;primary metabolic process;protein metabolic process;protein modification by small protein conjugation;protein modification by small protein conjugation or removal;protein modification process;protein ub…	acid-amino acid ligase activity;binding;catalytic activity;cation binding;ion binding;ligase activity;ligase activity, forming carbon-nitrogen bonds;metal ion binding;small conjugating protein ligase activity;transition metal ion binding;ubiquitin-protein ligase activity;zinc ion binding
26.7077	26.9195	27.0503	26.3433	26.3468	26.5448	28.1683	28.7179	28.5019		0.716562	+	0.241305	+	0.336754	GPR30_NES;GPR30-E2_NES	0.0160353	1	-0.480836	-4.00709	0.000290818	0.00579661	-2.05107	-11.8452	0.00113369	0.0177313	-1.57023	-8.33232	88	88	88	629.09	323.31	2656200000	251	14	15	21	19	11	14	44	59	54	Q09666	Neuroblast differentiation-associated protein AHNAK	AHNAK	sp|Q09666|AHNK_HUMAN Neuroblast differentiation-associated protein AHNAK OS=Homo sapiens OX=9606 GN=AHNAK PE=1 SV=2	biological regulation;cellular component assembly;cellular component organization;cellular component organization or biogenesis;macromolecular complex assembly;macromolecular complex subunit organization;protein complex assembly;protein complex subunit organization;protein oligomerization;regulation of biological process;regulation of cellular metabolic process;regulation of cellular process;regu…
28.7935	28.7425	28.6069	28.6409	28.6799	28.7433	28.3905	28.619	28.3392		0.981968		1.17973		1.2014		0.699123	1	-0.0262521	-0.415462	0.0588407	0.128793	0.238462	2.61933	0.061112	0.152627	0.264714	2.58333	88	88	83	481.89	323.31	4669600000	440	55	49	50	45	46	42	54	54	45	Q7Z6Z7	E3 ubiquitin-protein ligase HUWE1	HUWE1	sp|Q7Z6Z7|HUWE1_HUMAN E3 ubiquitin-protein ligase HUWE1 OS=Homo sapiens OX=9606 GN=HUWE1 PE=1 SV=3	base-excision repair;cell differentiation;cellular component organization;cellular component organization at cellular level;cellular component organization or biogenesis;cellular component organization or biogenesis at cellular level;cellular developmental process;cellular macromolecule metabolic process;cellular metabolic process;cellular nitrogen compound metabolic process;cellular process;cell…	acid-amino acid ligase activity;binding;catalytic activity;DNA binding;ligase activity;ligase activity, forming carbon-nitrogen bonds;nucleic acid binding;small conjugating protein ligase activity;ubiquitin-protein ligase activity
29.8981	29.7025	30.0532	30.2734	30.2503	30.1841	30.3739	30.2285	30.3427		1.27575		0.94668		0.74206		0.0286115	1	0.351341	3.3484	0.200735	0.307467	-0.079052	-1.5301	0.0177029	0.070569	-0.430393	-3.88918	87	87	87	244.5	323.31	13490000000	599	60	55	61	70	65	70	76	60	82	O75643;A0A494C1A5	U5 small nuclear ribonucleoprotein 200 kDa helicase	SNRNP200	sp|O75643|U520_HUMAN U5 small nuclear ribonucleoprotein 200 kDa helicase OS=Homo sapiens OX=9606 GN=SNRNP200 PE=1 SV=2;tr|A0A494C1A5|A0A494C1A5_HUMAN U5 small nuclear ribonucleoprotein 200 kDa helicase (Fragment) OS=Homo sapiens OX=9606 GN=SNRNP200 PE=1 SV	cell differentiation;cellular component assembly;cellular component assembly at cellular level;cellular component organization;cellular component organization at cellular level;cellular component organization or biogenesis;cellular component organization or biogenesis at cellular level;cellular developmental process;cellular macromolecular complex assembly;cellular macromolecular complex subunit …	adenyl nucleotide binding;adenyl ribonucleotide binding;ATP binding;ATPase activity;ATPase activity, coupled;ATP-dependent helicase activity;ATP-dependent RNA helicase activity;binding;catalytic activity;helicase activity;hydrolase activity;hydrolase activity, acting on acid anhydrides;hydrolase activity, acting on acid anhydrides, in phosphorus-containing anhydrides;identical protein binding;nuc…
29.8555	29.6179	29.9361	30.1516	30.1753	30.2288	30.262	29.7944	30.2321		1.30322		1.06367		0.816182		0.0176828	1	0.382085	3.89052	0.591445	0.73772	0.0890471	0.582566	0.176553	0.311101	-0.293038	-1.63901	86	86	86	273.6	323.31	12406000000	608	64	60	72	62	60	69	68	73	80	Q6P2Q9	Pre-mRNA-processing-splicing factor 8	PRPF8	sp|Q6P2Q9|PRP8_HUMAN Pre-mRNA-processing-splicing factor 8 OS=Homo sapiens OX=9606 GN=PRPF8 PE=1 SV=2	assembly of spliceosomal tri-snRNP;cellular component assembly;cellular component assembly at cellular level;cellular component organization;cellular component organization at cellular level;cellular component organization or biogenesis;cellular component organization or biogenesis at cellular level;cellular macromolecular complex assembly;cellular macromolecular complex subunit organization;cell…	binding;catalytic activity;K63-linked polyubiquitin binding;nucleic acid binding;polyubiquitin binding;protein binding;RNA binding;second spliceosomal transesterification activity;small conjugating protein binding;snRNA binding;U1 snRNA binding;U2 snRNA binding;U5 snRNA binding;U6 snRNA binding;ubiquitin binding
28.9165	29.1611	29.0292	28.9871	28.6267	28.9964	29.816	29.9633	29.9151		0.891607	+	0.490355	+	0.549968	GPR30_NES;GPR30-E2_NES	0.304879	1	-0.16552	-1.1758	0.00135209	0.0137372	-1.0281	-7.95578	0.000482565	0.0104715	-0.862581	-10.401	84	75	75	291.02	323.31	8742000000	462	41	51	44	44	32	44	63	71	72	Q14315	Filamin-C	FLNC	sp|Q14315|FLNC_HUMAN Filamin-C OS=Homo sapiens OX=9606 GN=FLNC PE=1 SV=3	anatomical structure development;cell development;cell junction assembly;cell junction organization;cellular component assembly;cellular component assembly at cellular level;cellular component organization;cellular component organization at cellular level;cellular component organization or biogenesis;cellular component organization or biogenesis at cellular level;cellular developmental process;ce…	ankyrin binding;binding;cytoskeletal protein binding;protein binding
28.5955	28.8203	28.6516	28.4686	28.3367	28.6202	29.32	29.5872	29.3395		0.86217	+	0.52108	+	0.604382	GPR30_NES;GPR30-E2_NES	0.114116	1	-0.213956	-2.01524	0.0013763	0.0135396	-0.940423	-7.91872	0.00266539	0.0226224	-0.726467	-6.64306	79	79	70	269.76	323.31	6209300000	429	30	41	45	40	28	41	68	68	68	Q9Y490	Talin-1	TLN1	sp|Q9Y490|TLN1_HUMAN Talin-1 OS=Homo sapiens OX=9606 GN=TLN1 PE=1 SV=3	actin cytoskeleton organization;actin filament-based process;axon guidance;biological adhesion;biological regulation;blood coagulation;cell activation;cell adhesion;cell junction assembly;cell junction organization;cell-cell adhesion;cell-cell junction assembly;cell-cell junction organization;cell-substrate junction assembly;cellular component assembly;cellular component assembly at cellular leve…	binding;cytoskeletal protein binding;integrin binding;LIM domain binding;protein binding;protein complex binding;protein domain specific binding;receptor binding;structural constituent of cytoskeleton;structural molecule activity;vinculin binding
28.6536	28.7391	28.5775	28.5357	28.6877	28.6431	28.756	29.2325	28.8999		0.976321		0.789685		0.808838		0.622579	1	-0.0345732	-0.532511	0.0829906	0.161691	-0.34065	-2.29944	0.108537	0.221656	-0.306077	-2.05931	78	78	78	266.94	323.31	5244500000	486	42	45	51	55	42	54	68	62	67	A5YKK6	CCR4-NOT transcription complex subunit 1	CNOT1	sp|A5YKK6|CNOT1_HUMAN CCR4-NOT transcription complex subunit 1 OS=Homo sapiens OX=9606 GN=CNOT1 PE=1 SV=2	biological regulation;biosynthetic process;catabolic process;cellular biosynthetic process;cellular catabolic process;cellular macromolecule biosynthetic process;cellular macromolecule catabolic process;cellular macromolecule metabolic process;cellular metabolic process;cellular nitrogen compound metabolic process;cellular process;developmental process;gene expression;gene silencing;gene silencin…	armadillo repeat domain binding;binding;estrogen receptor binding;hormone receptor binding;nuclear hormone receptor binding;protein binding;protein complex scaffold;protein domain specific binding;receptor binding;retinoic acid receptor binding;steroid hormone receptor binding;structural molecule activity;transcription factor binding
25.9758	25.6084	26.7872	26.0629	25.0632	26.1546	28.013	27.7864	28.3489		0.77725	+	0.204589	+	0.263221	GPR30_NES;GPR30-E2_NES	0.502093	1	-0.363549	-0.736854	0.00404462	0.0244094	-2.2892	-5.93336	0.00745796	0.0409803	-1.92565	-5.00614	78	78	70	394.46	323.31	1950200000	253	15	10	26	18	8	18	51	44	63	P46939	Utrophin	UTRN	sp|P46939|UTRN_HUMAN Utrophin OS=Homo sapiens OX=9606 GN=UTRN PE=1 SV=2	aging;anatomical structure development;anatomical structure morphogenesis;biological regulation;cell differentiation;cell part morphogenesis;cell projection morphogenesis;cell projection organization;cellular component morphogenesis;cellular component organization;cellular component organization at cellular level;cellular component organization or biogenesis;cellular component organization or bio…	actin binding;binding;cation binding;cytoskeletal protein binding;enzyme binding;integrin binding;ion binding;kinase binding;metal ion binding;protein binding;protein complex binding;protein kinase binding;receptor binding;transition metal ion binding;vinculin binding;zinc ion binding
29.0184	29.2224	29.1215	29.0191	29.0078	29.0684	30.6131	30.6015	30.6478		0.940158	+	0.332389	+	0.353546	GPR30_NES;GPR30-E2_NES	0.22282	1	-0.0890255	-1.44177	2.73644e-07	0	-1.58906	-68.4048	1.57018e-05	0	-1.50003	-24.7957	78	78	75	189.25	323.31	12730000000	449	27	44	49	33	40	40	68	73	75	P46940;A0A0J9YXZ5;H0YLE8	Ras GTPase-activating-like protein IQGAP1	IQGAP1	sp|P46940|IQGA1_HUMAN Ras GTPase-activating-like protein IQGAP1 OS=Homo sapiens OX=9606 GN=IQGAP1 PE=1 SV=1;tr|A0A0J9YXZ5|A0A0J9YXZ5_HUMAN Ras GTPase-activating-like protein IQGAP1 OS=Homo sapiens OX=9606 GN=IQGAP1 PE=1 SV=1;tr|H0YLE8|H0YLE8_HUMAN Ras GTPa	anatomical structure development;biological regulation;cell development;cell surface receptor linked signaling pathway;cellular developmental process;cellular metabolic process;cellular process;cellular response to calcium ion;cellular response to chemical stimulus;cellular response to endogenous stimulus;cellular response to epidermal growth factor stimulus;cellular response to fibroblast growth…	binding;calcium ion binding;calmodulin binding;cation binding;enzyme activator activity;enzyme binding;enzyme inhibitor activity;enzyme regulator activity;GTPase activator activity;GTPase inhibitor activity;GTPase regulator activity;ion binding;kinase activator activity;kinase binding;kinase regulator activity;lipid binding;metal ion binding;nucleoside-triphosphatase regulator activity;phosphatas…
28.6911	28.601	29.0034	28.7661	28.7959	28.9212	29.0004	29.0824	29.0823		1.0443	+	0.854223		0.817984	GPR30-E2_NES	0.657606	1	0.0625401	0.477992	0.0142825	0.048483	-0.227315	-4.14808	0.081128	0.182122	-0.289855	-2.3201	75	75	58	216.62	323.31	5684900000	498	49	44	58	52	38	59	71	62	65	A0A2R8YFK9;A0A2U3TZM0;A0A2R8Y521;A0A2R8Y5J0;A0A2R8Y425;Q14839;F5GWX5;A0A2R8Y212;A0A0C4DGG9;A0A2R8YDJ9;A0A2R8YFD8;A0A2R8YD40;A0A2R8Y445;A0A2R8Y8C1;A0A2R8YER1;A0A2R8YDW2;A0A2R8Y4X2;A0A2R8Y5Z7;A0A2R8Y685	Chromodomain-helicase-DNA-binding protein 4	CHD4	tr|A0A2R8YFK9|A0A2R8YFK9_HUMAN DNA helicase OS=Homo sapiens OX=9606 GN=CHD4 PE=1 SV=1;tr|A0A2U3TZM0|A0A2U3TZM0_HUMAN DNA helicase OS=Homo sapiens OX=9606 GN=CHD4 PE=1 SV=1;tr|A0A2R8Y521|A0A2R8Y521_HUMAN DNA helicase OS=Homo sapiens OX=9606 GN=CHD4 PE=1 SV=	ATP-dependent chromatin remodeling;biological regulation;biosynthetic process;cellular biosynthetic process;cellular component assembly;cellular component assembly at cellular level;cellular component organization;cellular component organization at cellular level;cellular component organization or biogenesis;cellular component organization or biogenesis at cellular level;cellular macromolecule bi…	adenyl nucleotide binding;adenyl ribonucleotide binding;ATP binding;ATPase activity;ATPase activity, coupled;ATP-dependent DNA helicase activity;ATP-dependent helicase activity;binding;catalytic activity;cation binding;DNA binding;DNA helicase activity;DNA-dependent ATPase activity;helicase activity;hydrolase activity;hydrolase activity, acting on acid anhydrides;hydrolase activity, acting on aci…
29.3004	29.422	29.634	29.138	29.0799	29.4488	29.8064	30.0032	30.2326		0.852696	+	0.577611		0.677394	GPR30-E2_NES	0.201063	1	-0.229897	-1.52872	0.00924743	0.0402258	-0.791829	-4.70887	0.0232127	0.0838218	-0.561933	-3.57783	75	75	74	156.27	323.31	9881100000	452	45	43	52	38	32	45	62	65	70	Q86UP2	Kinectin	KTN1	sp|Q86UP2|KTN1_HUMAN Kinectin OS=Homo sapiens OX=9606 GN=KTN1 PE=1 SV=1	biological regulation;cellular component movement;cellular process;cellular response to stimulus;intracellular signal transduction;microtubule-based movement;microtubule-based process;regulation of biological process;regulation of cellular process;response to stimulus;signal transduction;small GTPase mediated signal transduction
30.5544	30.6229	30.4112	30.5244	30.6072	30.6266	29.9424	30.3616	29.9995		1.03999		1.39948		1.34566		0.462982	1	0.0565732	0.810765	0.0228958	0.0712665	0.484891	3.59323	0.0420687	0.123192	0.428318	2.94762	74	74	71	236.02	323.31	15260000000	604	68	69	73	71	65	62	67	67	62	F8VPD4;P27708	CAD protein;Glutamine-dependent carbamoyl-phosphate synthase;Aspartate carbamoyltransferase;Dihydroorotase	CAD	tr|F8VPD4|F8VPD4_HUMAN Aspartate carbamoyltransferase OS=Homo sapiens OX=9606 GN=CAD PE=1 SV=1;sp|P27708|PYR1_HUMAN CAD protein OS=Homo sapiens OX=9606 GN=CAD PE=1 SV=3	amide biosynthetic process;amine biosynthetic process;amine catabolic process;amine metabolic process;anatomical structure development;anatomical structure morphogenesis;arginine biosynthetic process;arginine metabolic process;biological regulation;biosynthetic process;body fluid secretion;carbamoyl phosphate biosynthetic process;carbamoyl phosphate metabolic process;carboxylic acid biosynthetic …	adenyl nucleotide binding;adenyl ribonucleotide binding;amine binding;amino acid binding;aspartate binding;aspartate carbamoyltransferase activity;ATP binding;binding;carbamoyl-phosphate synthase (ammonia) activity;carbamoyl-phosphate synthase (glutamine-hydrolyzing) activity;carbon-nitrogen ligase activity, with glutamine as amido-N-donor;carboxyl- or carbamoyltransferase activity;carboxylic aci…
29.8923	29.7749	29.8577	30.1657	29.9077	29.643	29.5008	29.0985	29.122		1.04524		1.58557		1.51694		0.701286	1	0.0638371	0.41226	0.0289646	0.0826949	0.665003	3.33521	0.0111996	0.0518532	0.601166	4.45544	73	73	72	157.9	323.31	9034300000	507	63	52	58	64	58	51	61	53	47	P42704;A0A804HKI2;A0A804HL40;A0A804HKR3;A0A804HKJ0;A0A804HIG4;A0A804HK30;A0A804HIN4;A0A804HLG8;A0A804HI14;A0A804HJZ1;A0A804HI40;A0A804HIQ7;A0A804HHY9;A0A804HJI0;A0A804HJH8;A0A804HK02;C9JCA9;B8ZZ38	Leucine-rich PPR motif-containing protein, mitochondrial	LRPPRC	sp|P42704|LPPRC_HUMAN Leucine-rich PPR motif-containing protein, mitochondrial OS=Homo sapiens OX=9606 GN=LRPPRC PE=1 SV=3;tr|A0A804HKI2|A0A804HKI2_HUMAN Leucine-rich PPR motif-containing protein, mitochondrial OS=Homo sapiens OX=9606 GN=LRPPRC PE=4 SV=1;t	biological regulation;biosynthetic process;cellular biosynthetic process;cellular component movement;cellular macromolecule biosynthetic process;cellular macromolecule metabolic process;cellular metabolic process;cellular nitrogen compound metabolic process;cellular process;cytoskeleton-dependent intracellular transport;establishment of localization;establishment of localization in cell;establish…	beta-tubulin binding;binding;cytoskeletal protein binding;DNA binding;enzyme binding;microtubule binding;nucleic acid binding;protein binding;RNA binding;single-stranded DNA binding;structure-specific DNA binding;tubulin binding;ubiquitin protein ligase binding
28.8881	28.7249	28.7144	28.7821	28.3948	28.8884	29.0323	28.9625	29.2085		0.941242		0.768803		0.816796		0.614458	1	-0.0873629	-0.545413	0.0854548	0.165423	-0.379314	-2.27289	0.0340778	0.1084	-0.291951	-3.16325	72	72	72	225.49	309.27	5419900000	395	42	37	42	42	41	43	47	51	50	Q14008	Cytoskeleton-associated protein 5	CKAP5	sp|Q14008|CKAP5_HUMAN Cytoskeleton-associated protein 5 OS=Homo sapiens OX=9606 GN=CKAP5 PE=1 SV=3	biological regulation;cell cycle;cell cycle phase;cell cycle process;cell division;cellular component organization;cellular component organization at cellular level;cellular component organization or biogenesis;cellular component organization or biogenesis at cellular level;cellular process;cellular response to stimulus;centrosome organization;cytoskeleton organization;establishment of localizati…
29.5639	29.507	29.7416	29.6184	29.8046	29.7224	29.5667	29.525	29.7585		1.07995		1.07058		0.991323		0.279856	1	0.11096	1.24874	0.335059	0.459564	0.0983868	1.09491	0.906771	0.951278	-0.0125732	-0.124707	72	72	72	227.92	323.31	9408000000	500	50	50	56	53	52	53	66	55	65	Q92621	Nuclear pore complex protein Nup205	NUP205	sp|Q92621|NU205_HUMAN Nuclear pore complex protein Nup205 OS=Homo sapiens OX=9606 GN=NUP205 PE=1 SV=3	biological regulation;biosynthetic process;carbohydrate metabolic process;carbohydrate transport;cell cycle;cell cycle process;cell surface receptor linked signaling pathway;cellular biosynthetic process;cellular component assembly;cellular component assembly at cellular level;cellular component disassembly;cellular component disassembly at cellular level;cellular component organization;cellular …	structural constituent of nuclear pore;structural molecule activity
28.7202	28.7953	28.9879	28.414	28.3056	28.6791	29.6333	29.7306	29.9378		0.774733	+	0.405849	+	0.523856	GPR30_NES;GPR30-E2_NES	0.0543308	1	-0.368228	-2.69579	0.000803061	0.0104231	-1.30099	-9.11668	0.0014789	0.0180586	-0.932758	-7.77015	69	69	68	308.77	323.31	7586100000	402	33	34	41	26	29	44	58	61	76	E7EPN9;Q9Y520	Protein PRRC2C	PRRC2C	tr|E7EPN9|E7EPN9_HUMAN Protein PRRC2C OS=Homo sapiens OX=9606 GN=PRRC2C PE=1 SV=1;sp|Q9Y520|PRC2C_HUMAN Protein PRRC2C OS=Homo sapiens OX=9606 GN=PRRC2C PE=1 SV=4	cell differentiation;cellular developmental process;cellular process;developmental process;hemopoietic progenitor cell differentiation	binding;protein binding;protein C-terminus binding
28.5796	28.7262	28.8213	28.3876	28.115	28.4513	29.9943	30.157	29.9684		0.762561	+	0.303138	+	0.397526	GPR30_NES;GPR30-E2_NES	0.0350877	1	-0.391074	-3.13288	0.000131924	0.00538272	-1.72195	-14.4891	0.000131591	0.00329032	-1.33088	-14.4984	69	69	1	205.64	323.31	8485000000	429	33	43	41	35	27	32	77	68	73	J3KN01;A0A804HJ20		MLLT4	tr|J3KN01|J3KN01_HUMAN Afadin OS=Homo sapiens OX=9606 GN=AFDN PE=1 SV=2;tr|A0A804HJ20|A0A804HJ20_HUMAN Afadin OS=Homo sapiens OX=9606 GN=AFDN PE=4 SV=1	biological regulation;cellular process;cellular response to stimulus;regulation of biological process;regulation of cellular process;response to stimulus;signal transduction
28.0323	28.0923	28.5287	27.8747	27.7954	28.3076	28.0678	28.3876	28.6984		0.855487		0.762055		0.890785		0.370045	1	-0.225183	-1.00902	0.180292	0.283351	-0.392033	-1.6212	0.525233	0.68567	-0.16685	-0.695145	68	68	0	238.26	323.31	3575000000	339	35	30	41	30	27	34	44	46	52	Q14980	Nuclear mitotic apparatus protein 1	NUMA1	sp|Q14980|NUMA1_HUMAN Nuclear mitotic apparatus protein 1 OS=Homo sapiens OX=9606 GN=NUMA1 PE=1 SV=2	cell cycle;cell cycle phase;cell cycle process;cell differentiation;cell division;cellular component organization;cellular component organization at cellular level;cellular component organization or biogenesis;cellular component organization or biogenesis at cellular level;cellular developmental process;cellular process;cytoskeleton organization;developmental process;epithelial cell differentiati…	structural molecule activity
24.9117	25.4418	25.6162	24.179	24.7203	25.6597	26.1641	26.7628	26.7136		0.721834		0.309104		0.42822		0.384164	1	-0.470261	-0.976376	0.0231783	0.0714345	-1.69384	-3.57949	0.0128385	0.0552098	-1.22357	-4.28089	67	67	67	452.98	289.5	751800000	199	11	16	18	10	12	21	32	40	39	Q99996;A0A0A0MRF6;A0A7P0TBI4;A0A7P0T928;A0A7P0T9A9;A0A7P0Z4Q5;A0A7P0TAX3;A0A7P0TBH8;A0A7P0Z4N5;A0A7P0TAD6;A0A7P0T8N5;A0A7P0T939;A0A7P0TAA2;A0A2R8Y590	A-kinase anchor protein 9	AKAP9	sp|Q99996|AKAP9_HUMAN A-kinase anchor protein 9 OS=Homo sapiens OX=9606 GN=AKAP9 PE=1 SV=4;tr|A0A0A0MRF6|A0A0A0MRF6_HUMAN A-kinase anchor protein 9 OS=Homo sapiens OX=9606 GN=AKAP9 PE=1 SV=2;tr|A0A7P0TBI4|A0A7P0TBI4_HUMAN A-kinase anchor protein 9 OS=Homo	anatomical structure development;biological regulation;cell communication;cell cycle;cell cycle process;cell development;cell-cell signaling;cellular chemical homeostasis;cellular component organization;cellular component organization at cellular level;cellular component organization or biogenesis;cellular component organization or biogenesis at cellular level;cellular developmental process;cellu…	binding;channel regulator activity;ion channel binding;potassium channel regulator activity;protein binding;protein complex scaffold;receptor binding;structural molecule activity
31.2306	31.2481	31.0574	31.1046	31.201	31.1192	31.289	31.5306	31.2698		0.974591		0.857657		0.880018		0.613276	1	-0.0371316	-0.5473	0.0677949	0.140667	-0.221527	-2.48571	0.149897	0.27759	-0.184395	-1.77878	67	67	67	170.59	323.31	29927000000	670	66	73	65	78	75	62	95	89	67	P07814;V9GYZ6	Bifunctional glutamate/proline--tRNA ligase;Glutamate--tRNA ligase;Proline--tRNA ligase	EPRS	sp|P07814|SYEP_HUMAN Bifunctional glutamate/proline--tRNA ligase OS=Homo sapiens OX=9606 GN=EPRS1 PE=1 SV=5;tr|V9GYZ6|V9GYZ6_HUMAN Glutamyl-tRNA synthetase (Fragment) OS=Homo sapiens OX=9606 GN=EPRS1 PE=1 SV=1	amine metabolic process;amino acid activation;biological regulation;carboxylic acid metabolic process;cellular amine metabolic process;cellular amino acid metabolic process;cellular component assembly;cellular component organization;cellular component organization or biogenesis;cellular ketone metabolic process;cellular macromolecule metabolic process;cellular metabolic process;cellular nitrogen …	adenyl nucleotide binding;adenyl ribonucleotide binding;aminoacyl-tRNA ligase activity;ATP binding;binding;catalytic activity;enzyme binding;glutamate-tRNA ligase activity;GTPase binding;ligase activity;ligase activity, forming aminoacyl-tRNA and related compounds;ligase activity, forming carbon-oxygen bonds;nucleic acid binding;nucleotide binding;proline-tRNA ligase activity;protein binding;puri…
26.6196	26.6869	26.5067	26.7208	26.9318	26.5308	26.458	26.6369	26.4556		1.0893		1.15744		1.06255		0.386911	1	0.1234	0.970143	0.181184	0.283797	0.210935	1.61701	0.334194	0.487702	0.0875352	1.09714	67	67	67	492.62	204.91	1163200000	263	23	19	31	33	23	35	34	33	32	Q8NCM8	Cytoplasmic dynein 2 heavy chain 1	DYNC2H1	sp|Q8NCM8|DYHC2_HUMAN Cytoplasmic dynein 2 heavy chain 1 OS=Homo sapiens OX=9606 GN=DYNC2H1 PE=1 SV=4	anatomical structure development;anatomical structure formation involved in morphogenesis;anatomical structure morphogenesis;antigen processing and presentation;antigen processing and presentation of exogenous antigen;antigen processing and presentation of exogenous peptide antigen;antigen processing and presentation of exogenous peptide antigen via MHC class II;antigen processing and presentatio…	adenyl nucleotide binding;adenyl ribonucleotide binding;ATP binding;ATPase activity;binding;catalytic activity;hydrolase activity;hydrolase activity, acting on acid anhydrides;hydrolase activity, acting on acid anhydrides, in phosphorus-containing anhydrides;microtubule motor activity;motor activity;nucleoside-triphosphatase activity;nucleotide binding;purine nucleotide binding;purine ribonucleos…
29.1579	29.1159	29.4834	29.4965	29.4561	29.5087	29.4319	29.1855	29.5134		1.17665		1.07939		0.917337		0.115854	1	0.234687	2.00198	0.331579	0.455895	0.110212	1.10389	0.459726	0.622669	-0.124475	-0.817132	66	66	66	208.83	323.31	7586000000	460	47	44	55	54	45	51	57	50	57	A0A3B3IUD7;Q14690	Protein RRP5 homolog	PDCD11	tr|A0A3B3IUD7|A0A3B3IUD7_HUMAN Programmed cell death 11, isoform CRA_a OS=Homo sapiens OX=9606 GN=PDCD11 PE=1 SV=1;sp|Q14690|RRP5_HUMAN Protein RRP5 homolog OS=Homo sapiens OX=9606 GN=PDCD11 PE=1 SV=3	cellular macromolecule metabolic process;cellular metabolic process;cellular nitrogen compound metabolic process;cellular process;macromolecule metabolic process;maturation of 5.8S rRNA;maturation of 5.8S rRNA from tricistronic rRNA transcript (SSU-rRNA, 5.8S rRNA, LSU-rRNA);maturation of SSU-rRNA;maturation of SSU-rRNA from tricistronic rRNA transcript (SSU-rRNA, 5.8S rRNA, LSU-rRNA);metabolic p…	binding;protein binding;transcription factor binding
27.5655	27.7006	28.1755	27.5316	27.7793	27.7561	29.2037	29.1031	29.3637		0.917089	+	0.345205	+	0.376414	GPR30_NES;GPR30-E2_NES	0.568335	1	-0.124866	-0.620834	0.000150518	0.00479121	-1.53448	-14.0117	0.00213376	0.0193579	-1.40961	-7.05057	65	65	3	197.46	323.31	4769900000	334	23	27	31	21	24	31	56	57	64	A0A087X0K9;G3V1L9;Q07157	Tight junction protein ZO-1	TJP1	tr|A0A087X0K9|A0A087X0K9_HUMAN Tight junction protein 1 (Zona occludens 1), isoform CRA_a OS=Homo sapiens OX=9606 GN=TJP1 PE=1 SV=2;tr|G3V1L9|G3V1L9_HUMAN Tight junction protein ZO-1 OS=Homo sapiens OX=9606 GN=TJP1 PE=1 SV=2;sp|Q07157|ZO1_HUMAN Tight junct	anatomical structure formation involved in morphogenesis;apoptosis;biological regulation;blastocyst formation;carbohydrate homeostasis;cell death;cell junction assembly;cell junction organization;cell-cell junction assembly;cell-cell junction organization;cellular chemical homeostasis;cellular component assembly;cellular component assembly at cellular level;cellular component disassembly;cellular…
28.0738	28.4803	28.06	27.9514	28.359	28.0395	27.4814	28.1142	27.6863		0.940769		1.27989		1.36047		0.659276	1	-0.0880877	-0.475435	0.186832	0.289269	0.356019	1.59094	0.127918	0.247071	0.444106	1.9156	65	65	23	289.63	270.7	3052400000	281	34	30	26	32	30	31	30	38	30	A0A087X2H1;Q9ULT8	E3 ubiquitin-protein ligase HECTD1	HECTD1	tr|A0A087X2H1|A0A087X2H1_HUMAN HECT-type E3 ubiquitin transferase OS=Homo sapiens OX=9606 GN=HECTD1 PE=1 SV=1;sp|Q9ULT8|HECD1_HUMAN E3 ubiquitin-protein ligase HECTD1 OS=Homo sapiens OX=9606 GN=HECTD1 PE=1 SV=3	anatomical structure formation involved in morphogenesis;cellular macromolecule metabolic process;cellular metabolic process;cellular process;cellular protein metabolic process;developmental process;macromolecule metabolic process;macromolecule modification;metabolic process;neural tube closure;primary metabolic process;protein metabolic process;protein modification by small protein conjugation;p…	acid-amino acid ligase activity;binding;catalytic activity;cation binding;ion binding;ligase activity;ligase activity, forming carbon-nitrogen bonds;metal ion binding;small conjugating protein ligase activity;ubiquitin-protein ligase activity
28.9913	29.1173	29.3097	29.1736	29.1023	29.1189	28.9195	29.1332	29.1719		0.994567		1.0401		1.04579		0.93808	1	-0.00785891	-0.0826779	0.524094	0.668148	0.0567284	0.697165	0.622757	0.773405	0.0645873	0.53223	65	65	65	143.23	323.31	6270300000	396	39	44	49	40	37	43	48	48	48	Q14683;G8JLG1;A0A6Q8PHC3	Structural maintenance of chromosomes protein 1A;Structural maintenance of chromosomes protein	SMC1A	sp|Q14683|SMC1A_HUMAN Structural maintenance of chromosomes protein 1A OS=Homo sapiens OX=9606 GN=SMC1A PE=1 SV=2;tr|G8JLG1|G8JLG1_HUMAN Structural maintenance of chromosomes protein OS=Homo sapiens OX=9606 GN=SMC1A PE=1 SV=2;tr|A0A6Q8PHC3|A0A6Q8PHC3_HUMAN	biological regulation;cell cycle;cell cycle checkpoint;cell cycle phase;cell cycle process;cell division;cellular component organization;cellular component organization at cellular level;cellular component organization or biogenesis;cellular component organization or biogenesis at cellular level;cellular macromolecule metabolic process;cellular metabolic process;cellular nitrogen compound metabol…	adenyl nucleotide binding;adenyl ribonucleotide binding;ATP binding;binding;catalytic activity;chromatin binding;hydrolase activity;hydrolase activity, acting on acid anhydrides;hydrolase activity, acting on acid anhydrides, in phosphorus-containing anhydrides;microtubule motor activity;motor activity;nucleoside-triphosphatase activity;nucleotide binding;protein binding;protein dimerization activ…
27.4318	27.514	27.2394	27.0747	27.3285	27.2812	26.8917	27.1641	26.865		0.890728		1.19294		1.33928		0.212591	1	-0.166943	-1.48152	0.10796	0.193592	0.254518	2.06401	0.0283751	0.0964573	0.42146	3.35733	65	65	13	530.25	257	1633300000	262	24	29	33	29	26	31	31	32	27	Q9NR09	Baculoviral IAP repeat-containing protein 6	BIRC6	sp|Q9NR09|BIRC6_HUMAN Baculoviral IAP repeat-containing protein 6 OS=Homo sapiens OX=9606 GN=BIRC6 PE=1 SV=2	anatomical structure development;apoptosis;biological regulation;cell cycle phase;cell cycle process;cell death;cell division;cellular component organization;cellular component organization at cellular level;cellular component organization or biogenesis;cellular component organization or biogenesis at cellular level;cellular macromolecule metabolic process;cellular metabolic process;cellular proc…	acid-amino acid ligase activity;catalytic activity;cysteine-type endopeptidase inhibitor activity;endopeptidase inhibitor activity;endopeptidase regulator activity;enzyme inhibitor activity;enzyme regulator activity;ligase activity;ligase activity, forming carbon-nitrogen bonds;peptidase inhibitor activity;peptidase regulator activity;small conjugating protein ligase activity;ubiquitin-protein li…
29.3355	29.6171	29.5253	29.0809	29.13	29.3842	28.3221	28.1535	28.5447		0.815484	+	1.8128	+	2.22297	GPR30_NES;GPR30-E2_NES	0.0786573	1	-0.294271	-2.34835	0.00431102	0.0262167	0.85822	5.83065	0.00119936	0.0176459	1.15249	8.21026	64	64	64	213.7	323.31	5431400000	376	51	49	53	44	48	49	24	27	31	Q5JRA6;A0A0A0MRH6	Melanoma inhibitory activity protein 3	MIA3	sp|Q5JRA6|TGO1_HUMAN Transport and Golgi organization protein 1 homolog OS=Homo sapiens OX=9606 GN=MIA3 PE=1 SV=1;tr|A0A0A0MRH6|A0A0A0MRH6_HUMAN Transport and Golgi organization protein 1 homolog (Fragment) OS=Homo sapiens OX=9606 GN=MIA3 PE=1 SV=6	anatomical structure development;biological regulation;cell development;cellular component organization;cellular component organization at cellular level;cellular component organization or biogenesis;cellular component organization or biogenesis at cellular level;cellular developmental process;cellular process;chondrocyte development;collagen fibril organization;developmental process;establishmen…
28.0317	28.0798	27.8327	28.0019	28.0759	28.0468	27.9774	28.2888	28.2592		1.04257		0.911571		0.874354		0.48702	1	0.0601374	0.764799	0.258706	0.372072	-0.133573	-1.31541	0.195485	0.334138	-0.19371	-1.55255	64	64	64	251.46	292.56	3202000000	349	37	36	35	36	33	39	43	43	47	Q8N3C0	Activating signal cointegrator 1 complex subunit 3	ASCC3	sp|Q8N3C0|ASCC3_HUMAN Activating signal cointegrator 1 complex subunit 3 OS=Homo sapiens OX=9606 GN=ASCC3 PE=1 SV=3	biological regulation;biosynthetic process;cell proliferation;cellular biosynthetic process;cellular macromolecule biosynthetic process;cellular macromolecule metabolic process;cellular metabolic process;cellular nitrogen compound metabolic process;cellular process;cellular response to stimulus;cellular response to stress;DNA conformation change;DNA dealkylation;DNA dealkylation involved in DNA r…	3'-5' DNA helicase activity;adenyl nucleotide binding;adenyl ribonucleotide binding;ATP binding;ATPase activity;ATPase activity, coupled;ATP-dependent 3'-5' DNA helicase activity;ATP-dependent DNA helicase activity;ATP-dependent helicase activity;binding;catalytic activity;DNA helicase activity;DNA-dependent ATPase activity;helicase activity;hydrolase activity;hydrolase activity, acting on acid a…
30.0036	30.2047	29.5754	30.1867	30.2348	29.8809	30.1312	29.9502	29.6286		1.12733		1.14669		1.01717		0.468477	1	0.172912	0.800097	0.343792	0.469173	0.197477	1.07275	0.922342	0.959832	0.0245647	0.103776	62	62	50	174.38	323.31	11903000000	494	50	54	43	55	56	54	66	62	54	P11388	DNA topoisomerase 2-alpha	TOP2A	sp|P11388|TOP2A_HUMAN DNA topoisomerase 2-alpha OS=Homo sapiens OX=9606 GN=TOP2A PE=1 SV=3	apoptotic chromosome condensation;biological regulation;cell cycle;cell cycle process;cell differentiation;cell division;cellular component organization;cellular component organization at cellular level;cellular component organization or biogenesis;cellular component organization or biogenesis at cellular level;cellular developmental process;cellular macromolecule metabolic process;cellular metab…	adenyl nucleotide binding;adenyl ribonucleotide binding;ATP binding;ATPase activity;ATPase activity, coupled;binding;catalytic activity;cation binding;chromatin binding;DNA bending activity;DNA binding;DNA topoisomerase (ATP-hydrolyzing) activity;DNA topoisomerase activity;DNA-dependent ATPase activity;drug binding;enzyme binding;histone deacetylase binding;hydrolase activity;hydrolase activity, …
28.607	28.5184	28.2707	28.6045	28.6085	28.7187	28.7096	28.3802	28.6551		1.13172		1.0441		0.922575		0.171738	1	0.178518	1.66254	0.59711	0.744093	0.0622565	0.573336	0.462568	0.624539	-0.116262	-0.811573	62	50	50	183.26	273.5	4401000000	316	25	29	36	35	37	39	37	38	40	Q02880;E9PCY5	DNA topoisomerase 2-beta;DNA topoisomerase 2	TOP2B	sp|Q02880|TOP2B_HUMAN DNA topoisomerase 2-beta OS=Homo sapiens OX=9606 GN=TOP2B PE=1 SV=3;tr|E9PCY5|E9PCY5_HUMAN DNA topoisomerase 2 (Fragment) OS=Homo sapiens OX=9606 GN=TOP2B PE=1 SV=1	anatomical structure development;anatomical structure morphogenesis;axonogenesis;cell cycle process;cell migration;cell motility;cell part morphogenesis;cell projection morphogenesis;cell projection organization;cellular component morphogenesis;cellular component movement;cellular component organization;cellular component organization at cellular level;cellular component organization or biogenesi…	adenyl nucleotide binding;adenyl ribonucleotide binding;ATP binding;ATPase activity;ATPase activity, coupled;binding;catalytic activity;cation binding;chromatin binding;DNA bending activity;DNA binding;DNA topoisomerase (ATP-hydrolyzing) activity;DNA topoisomerase activity;DNA-dependent ATPase activity;enzyme binding;histone deacetylase binding;hydrolase activity;hydrolase activity, acting on aci…
30.8694	30.7828	30.6203	30.7564	30.6889	30.6122	25.8124	22.9806	25.4499		0.951544	+	61.3157	+	64.4381	GPR30_NES;GPR30-E2_NES	0.442008	1	-0.0716578	-0.852429	0.00262972	0.019914	5.93818	6.66715	0.00253606	0.0220564	6.00984	6.73235	62	62	58	177.19	323.31	10283000000	337	53	51	51	61	46	46	15	4	10	Q9NYU2	UDP-glucose:glycoprotein glucosyltransferase 1	UGGT1	sp|Q9NYU2|UGGG1_HUMAN UDP-glucose:glycoprotein glucosyltransferase 1 OS=Homo sapiens OX=9606 GN=UGGT1 PE=1 SV=3	carbohydrate metabolic process;cellular carbohydrate metabolic process;cellular macromolecule metabolic process;cellular metabolic process;cellular process;cellular protein metabolic process;'de novo' posttranslational protein folding;'de novo' protein folding;glycosylation;macromolecule glycosylation;macromolecule metabolic process;macromolecule modification;metabolic process;peptidyl-amino acid…	binding;catalytic activity;glucosyltransferase activity;protein binding;transferase activity;transferase activity, transferring glycosyl groups;transferase activity, transferring hexosyl groups;UDP-glucose:glycoprotein glucosyltransferase activity;UDP-glucosyltransferase activity;UDP-glycosyltransferase activity;unfolded protein binding
26.9033	27.1011	27.5301	27.2204	27.3052	27.5195	26.8802	26.8254	27.5243		1.1252		1.20727		1.07293		0.453728	1	0.170187	0.828958	0.323283	0.44641	0.271743	1.12565	0.744552	0.858685	0.101556	0.349192	61	61	61	318.38	254.97	1652000000	296	27	26	38	33	28	37	33	26	48	O75691	Small subunit processome component 20 homolog	UTP20	sp|O75691|UTP20_HUMAN Small subunit processome component 20 homolog OS=Homo sapiens OX=9606 GN=UTP20 PE=1 SV=3	biological regulation;cellular macromolecule metabolic process;cellular metabolic process;cellular nitrogen compound metabolic process;cellular process;cleavage involved in rRNA processing;endonucleolytic cleavage in 5'-ETS of tricistronic rRNA transcript (SSU-rRNA, 5.8S rRNA, LSU-rRNA);endonucleolytic cleavage in ITS1 to separate SSU-rRNA from 5.8S rRNA and LSU-rRNA from tricistronic rRNA transc…
28.1515	28.1101	28.1861	28.4642	28.4788	28.2411	28.2424	27.9555	28.2492		1.1855		1.18566		1.00014		0.0373158	1	0.24549	3.06937	0.117785	0.206041	0.245694	1.98751	0.998458	0.998822	0.000204086	0.00205636	61	61	61	242.37	323.31	3507100000	298	32	29	25	40	35	31	41	33	32	Q9H583;Q5T3Q7	HEAT repeat-containing protein 1;HEAT repeat-containing protein 1, N-terminally processed	HEATR1	sp|Q9H583|HEAT1_HUMAN HEAT repeat-containing protein 1 OS=Homo sapiens OX=9606 GN=HEATR1 PE=1 SV=3;tr|Q5T3Q7|Q5T3Q7_HUMAN HEAT repeat-containing protein 1 OS=Homo sapiens OX=9606 GN=HEATR1 PE=1 SV=1	biological regulation;cellular macromolecule metabolic process;cellular metabolic process;cellular nitrogen compound metabolic process;cellular process;macromolecule metabolic process;maturation of SSU-rRNA;maturation of SSU-rRNA from tricistronic rRNA transcript (SSU-rRNA, 5.8S rRNA, LSU-rRNA);metabolic process;ncRNA metabolic process;ncRNA processing;nitrogen compound metabolic process;nucleic …	binding;nucleic acid binding;RNA binding;snoRNA binding
29.8282	29.6906	29.8699	29.7802	29.8916	29.8531	29.9877	30.0426	29.9035		1.03197		0.909841		0.881657		0.512616	1	0.0453981	0.717716	0.0586555	0.128708	-0.136313	-2.62234	0.0547388	0.142058	-0.181711	-2.68858	59	59	59	133.08	323.31	11189000000	389	41	36	44	46	38	39	52	49	44	A0A6I8PIT3;A0A6I8PIV1;Q9P2J5;A0A6I8PRS0;B4DER1;A0A6I8PLB8;A0A6I8PL42;A0A6I8PS05;A0A6I8PLB3;A0A6I8PIP7;A0A6I8PTV8	Leucine--tRNA ligase, cytoplasmic	LARS	tr|A0A6I8PIT3|A0A6I8PIT3_HUMAN Leucyl-tRNA synthetase OS=Homo sapiens OX=9606 GN=LARS1 PE=1 SV=1;tr|A0A6I8PIV1|A0A6I8PIV1_HUMAN Leucyl-tRNA synthetase OS=Homo sapiens OX=9606 GN=LARS1 PE=1 SV=1;sp|Q9P2J5|SYLC_HUMAN Leucine--tRNA ligase, cytoplasmic OS=Homo	amine metabolic process;amino acid activation;carboxylic acid metabolic process;cellular amine metabolic process;cellular amino acid metabolic process;cellular ketone metabolic process;cellular macromolecule metabolic process;cellular metabolic process;cellular nitrogen compound metabolic process;cellular process;gene expression;leucyl-tRNA aminoacylation;macromolecule metabolic process;metabolic…	adenyl nucleotide binding;adenyl ribonucleotide binding;aminoacyl-tRNA editing activity;aminoacyl-tRNA ligase activity;ATP binding;binding;carboxylic ester hydrolase activity;catalytic activity;hydrolase activity;hydrolase activity, acting on ester bonds;leucine-tRNA ligase activity;ligase activity;ligase activity, forming aminoacyl-tRNA and related compounds;ligase activity, forming carbon-oxyge…
27.9991	28.0684	28.2956	28.1023	28.1835	28.2684	28.1983	28.1958	28.3121		1.04517		0.965501		0.923774		0.564353	1	0.0637385	0.627532	0.455731	0.59474	-0.0506503	-0.824995	0.305386	0.457655	-0.114389	-1.17438	59	59	59	226.37	323.31	3446000000	320	26	27	43	34	26	40	40	41	43	A6NHR9;J3KTL8	Structural maintenance of chromosomes flexible hinge domain-containing protein 1	SMCHD1	sp|A6NHR9|SMHD1_HUMAN Structural maintenance of chromosomes flexible hinge domain-containing protein 1 OS=Homo sapiens OX=9606 GN=SMCHD1 PE=1 SV=2;tr|J3KTL8|J3KTL8_HUMAN Structural maintenance of chromosomes flexible hinge domain-containing protein 1 (Frag	biological regulation;cellular component organization;cellular component organization at cellular level;cellular component organization or biogenesis;cellular component organization or biogenesis at cellular level;cellular process;chromosome organization;dosage compensation;dosage compensation, by inactivation of X chromosome;inactivation of X chromosome by DNA methylation;organelle organization;…	adenyl nucleotide binding;adenyl ribonucleotide binding;ATP binding;binding;nucleotide binding;purine nucleotide binding;purine ribonucleoside triphosphate binding;purine ribonucleotide binding;ribonucleotide binding
NaN	NaN	22.6829	NaN	NaN	22.473	24.0968	22.3967	23.9254		1.4811		0.253322		0.171037		0.646879	1	0.566668	0.494503	0.0534012	0.120574	-1.98096	-2.71246	0.0945916	0.204284	-2.54762	-2.18145	59	2	2	104.85	19.681	79507000	7	0	0	1	0	0	1	2	1	2	F5GXS2;H7C144		ACTN4	tr|F5GXS2|F5GXS2_HUMAN Actinin, alpha 4, isoform CRA_a OS=Homo sapiens OX=9606 GN=ACTN4 PE=1 SV=3;tr|H7C144|H7C144_HUMAN Alpha-actinin-4 OS=Homo sapiens OX=9606 GN=ACTN4 PE=1 SV=2	cell junction assembly;cell junction organization;cell-cell junction assembly;cell-cell junction organization;cellular component assembly;cellular component assembly at cellular level;cellular component organization;cellular component organization at cellular level;cellular component organization or biogenesis;cellular component organization or biogenesis at cellular level;cellular process;tight …	binding;calcium ion binding;cation binding;ion binding;metal ion binding
26.3584	26.106	26.9475	26.5911	26.2284	26.8839	26.4625	26.417	26.9583		1.06966		0.969438		0.906308		0.771913	1	0.0971464	0.31018	0.870076	0.931509	-0.0447801	-0.174326	0.664529	0.805634	-0.141926	-0.467417	59	59	59	438.92	236.51	1074800000	223	21	18	28	27	13	24	29	25	38	H0Y4W2;F2Z2U4;Q9Y4A5	Transformation/transcription domain-associated protein	TRRAP	tr|H0Y4W2|H0Y4W2_HUMAN Transformation/transcription domain-associated protein OS=Homo sapiens OX=9606 GN=TRRAP PE=1 SV=2;tr|F2Z2U4|F2Z2U4_HUMAN Transformation/transcription domain-associated protein OS=Homo sapiens OX=9606 GN=TRRAP PE=1 SV=3;sp|Q9Y4A5|TRRA	biological regulation;biosynthetic process;cell cycle checkpoint;cellular biosynthetic process;cellular component organization;cellular component organization at cellular level;cellular component organization or biogenesis;cellular component organization or biogenesis at cellular level;cellular macromolecule biosynthetic process;cellular macromolecule metabolic process;cellular metabolic process;…	catalytic activity;kinase activity;phosphotransferase activity, alcohol group as acceptor;protein binding transcription factor activity;transcription coactivator activity;transcription cofactor activity;transcription factor binding transcription factor activity;transferase activity;transferase activity, transferring phosphorus-containing groups
31.3025	31.4285	31.581	30.9991	31.2229	31.2958	32.5878	32.7326	32.6883		0.832355	+	0.3543	+	0.42566	GPR30_NES;GPR30-E2_NES	0.0924305	1	-0.264729	-2.20215	0.000111476	0.0029589	-1.49696	-15.1218	0.000173821	0.00279452	-1.23223	-13.5079	59	59	1	104.85	323.31	52742000000	601	56	61	64	59	51	65	75	81	89	O43707	Alpha-actinin-4	ACTN4	sp|O43707|ACTN4_HUMAN Alpha-actinin-4 OS=Homo sapiens OX=9606 GN=ACTN4 PE=1 SV=2	actin cytoskeleton organization;actin filament bundle assembly;actin filament organization;actin filament-based process;biological regulation;blood coagulation;cell activation;cell junction assembly;cell junction organization;cell-cell junction assembly;cell-cell junction organization;cellular component assembly;cellular component assembly at cellular level;cellular component organization;cellula…	actin binding;actin filament binding;binding;calcium ion binding;cation binding;cytoskeletal protein binding;hormone receptor binding;identical protein binding;integrin binding;ion binding;ligand-dependent nuclear receptor transcription coactivator activity;metal ion binding;nuclear hormone receptor binding;nucleoside binding;protein binding;protein binding transcription factor activity;protein c…
31.9813	31.8105	31.8427	31.9045	31.7195	32.0194	31.3864	31.4687	31.7191		1.00206		1.28024		1.27761		0.978164	1	0.0029672	0.02912	0.0550349	0.123458	0.356414	2.68338	0.0352052	0.110317	0.353447	3.12941	58	58	6	89.321	323.31	39166000000	447	51	56	54	46	49	48	53	48	42	P55072;A0A7P0TAW3;A0A7I2V540;C9JUP7;A0A7P0T8Q5;A0A7P0TAQ1;A0A7P0Z4C6;A0A7I2V2Y2	Transitional endoplasmic reticulum ATPase	VCP	sp|P55072|TERA_HUMAN Transitional endoplasmic reticulum ATPase OS=Homo sapiens OX=9606 GN=VCP PE=1 SV=4;tr|A0A7P0TAW3|A0A7P0TAW3_HUMAN 15S Mg(2+)-ATPase p97 subunit OS=Homo sapiens OX=9606 GN=VCP PE=1 SV=1;tr|A0A7I2V540|A0A7I2V540_HUMAN 15S Mg(2+)-ATPase p	activation of caspase activity;aggresome assembly;biological regulation;biosynthetic process;carbohydrate metabolic process;catabolic process;cellular biosynthetic process;cellular carbohydrate metabolic process;cellular catabolic process;cellular component assembly;cellular component assembly at cellular level;cellular component organization;cellular component organization at cellular level;cell…	adenyl nucleotide binding;adenyl ribonucleotide binding;ADP binding;ATP binding;ATPase activity;binding;catalytic activity;enzyme activator activity;enzyme binding;enzyme regulator activity;hydrolase activity;hydrolase activity, acting on acid anhydrides;hydrolase activity, acting on acid anhydrides, in phosphorus-containing anhydrides;lipid binding;nucleoside-triphosphatase activity;nucleotide b…
29.9116	29.9818	30.0914	29.6775	29.7701	30.019	30.2873	30.6454	30.6404		0.887152	+	0.614657		0.692843	GPR30-E2_NES	0.206278	1	-0.172747	-1.50704	0.0109063	0.0435667	-0.702147	-4.48994	0.0150358	0.0606	-0.529399	-4.08507	58	58	58	166.57	323.31	14480000000	493	55	43	58	49	40	54	67	62	65	Q14152	Eukaryotic translation initiation factor 3 subunit A	EIF3A	sp|Q14152|EIF3A_HUMAN Eukaryotic translation initiation factor 3 subunit A OS=Homo sapiens OX=9606 GN=EIF3A PE=1 SV=1	biological regulation;biosynthetic process;cellular biosynthetic process;cellular component assembly;cellular component assembly at cellular level;cellular component organization;cellular component organization at cellular level;cellular component organization or biogenesis;cellular component organization or biogenesis at cellular level;cellular macromolecular complex assembly;cellular macromolec…	binding;nucleic acid binding;RNA binding;structural molecule activity;translation factor activity, nucleic acid binding;translation initiation factor activity
22.7055	23.6085	24.6185	22.7883	23.3286	24.6909	25.6876	25.6687	26.455		0.971575		0.198266		0.204067		0.960578	1	-0.0416031	-0.0525932	0.0199469	0.064224	-2.33449	-3.75001	0.019818	0.0750413	-2.29289	-3.75749	58	58	56	796.43	167.07	423460000	143	4	7	13	6	5	13	27	24	44	Q8WXH0;G3V5X4;A0A0A0MRE3;A0A0C4DGK3	Nesprin-2	SYNE2	sp|Q8WXH0|SYNE2_HUMAN Nesprin-2 OS=Homo sapiens OX=9606 GN=SYNE2 PE=1 SV=3;tr|G3V5X4|G3V5X4_HUMAN Nesprin-2 OS=Homo sapiens OX=9606 GN=SYNE2 PE=1 SV=1;tr|A0A0A0MRE3|A0A0A0MRE3_HUMAN Nesprin-2 OS=Homo sapiens OX=9606 GN=SYNE2 PE=1 SV=1;tr|A0A0C4DGK3|A0A0C4D	actin filament-based movement;actin filament-based process;ameboidal cell migration;biological regulation;cell migration;cell motility;cellular component movement;cellular component organization;cellular component organization at cellular level;cellular component organization or biogenesis;cellular component organization or biogenesis at cellular level;cellular localization;cellular macromolecule…	actin binding;binding;cytoskeletal protein binding;protein binding
29.3769	29.3536	29.4262	29.4652	29.4294	29.2481	29.2407	29.1464	29.0727		0.996804		1.17094		1.17469		0.950922	1	-0.00461833	-0.0654963	0.0516174	0.118221	0.227664	2.74541	0.0119314	0.0532216	0.232282	4.37393	57	57	57	130.55	264.13	7359100000	406	49	45	43	50	43	40	52	41	43	H7BXY3;Q7L2E3	Putative ATP-dependent RNA helicase DHX30	DHX30	tr|H7BXY3|H7BXY3_HUMAN RNA helicase OS=Homo sapiens OX=9606 GN=DHX30 PE=1 SV=1;sp|Q7L2E3|DHX30_HUMAN ATP-dependent RNA helicase DHX30 OS=Homo sapiens OX=9606 GN=DHX30 PE=1 SV=1	cellular macromolecule metabolic process;cellular metabolic process;cellular nitrogen compound metabolic process;cellular process;macromolecule metabolic process;metabolic process;nitrogen compound metabolic process;nucleic acid metabolic process;nucleobase-containing compound metabolic process;primary metabolic process;RNA metabolic process;RNA processing	adenyl nucleotide binding;adenyl ribonucleotide binding;ATP binding;ATPase activity;ATPase activity, coupled;ATP-dependent helicase activity;ATP-dependent RNA helicase activity;binding;catalytic activity;chromatin binding;double-stranded RNA binding;helicase activity;hydrolase activity;hydrolase activity, acting on acid anhydrides;hydrolase activity, acting on acid anhydrides, in phosphorus-conta…
29.7774	29.6658	29.9762	29.9352	29.6306	29.9939	30.2845	30.1337	30.2841		1.03294		0.767989		0.743498		0.762685	1	0.0467574	0.32327	0.0366005	0.0962399	-0.380842	-3.08926	0.0145896	0.0604785	-0.427599	-4.12192	57	57	57	145.83	323.31	12415000000	466	43	37	50	48	44	48	67	61	68	O75533	Splicing factor 3B subunit 1	SF3B1	sp|O75533|SF3B1_HUMAN Splicing factor 3B subunit 1 OS=Homo sapiens OX=9606 GN=SF3B1 PE=1 SV=3	anterior/posterior pattern specification;cellular macromolecule metabolic process;cellular metabolic process;cellular nitrogen compound metabolic process;cellular process;developmental process;gene expression;macromolecule metabolic process;metabolic process;mRNA metabolic process;mRNA processing;nitrogen compound metabolic process;nuclear mRNA splicing, via spliceosome;nucleic acid metabolic pro…	binding;chromatin binding
26.3299	26.4739	26.5609	26.3508	26.4436	26.5455	26.4182	26.6164	26.5884		0.994304		0.936707		0.942072		0.929708	1	-0.00824038	-0.0938948	0.322583	0.445859	-0.0943305	-1.12751	0.400069	0.559078	-0.0860901	-0.940813	57	57	57	527.22	229.6	1018200000	224	20	16	26	23	18	28	27	33	33	O95714	E3 ubiquitin-protein ligase HERC2	HERC2	sp|O95714|HERC2_HUMAN E3 ubiquitin-protein ligase HERC2 OS=Homo sapiens OX=9606 GN=HERC2 PE=1 SV=2	biological regulation;cellular macromolecule metabolic process;cellular metabolic process;cellular nitrogen compound metabolic process;cellular process;cellular protein metabolic process;cellular response to stimulus;cellular response to stress;DNA metabolic process;DNA repair;establishment of localization;establishment of localization in cell;establishment of protein localization;gamete generati…	acid-amino acid ligase activity;binding;catalytic activity;cation binding;enzyme binding;enzyme regulator activity;GTPase regulator activity;guanyl-nucleotide exchange factor activity;heme binding;ion binding;iron ion binding;ligase activity;ligase activity, forming carbon-nitrogen bonds;metal ion binding;nucleoside-triphosphatase regulator activity;protein binding;small conjugating protein bindi…
29.5379	29.5258	29.3214	29.4154	29.5284	29.2855	29.5919	29.7393	29.5092		0.964653		0.868348		0.900166		0.62868	1	-0.0519187	-0.522886	0.104236	0.188564	-0.203655	-2.09504	0.193801	0.332519	-0.151737	-1.55989	57	57	57	168.59	323.31	8555500000	440	48	47	46	49	41	48	55	53	53	Q8TEQ6	Gem-associated protein 5	GEMIN5	sp|Q8TEQ6|GEMI5_HUMAN Gem-associated protein 5 OS=Homo sapiens OX=9606 GN=GEMIN5 PE=1 SV=3	cellular component assembly;cellular component assembly at cellular level;cellular component organization;cellular component organization at cellular level;cellular component organization or biogenesis;cellular component organization or biogenesis at cellular level;cellular macromolecular complex assembly;cellular macromolecular complex subunit organization;cellular macromolecule metabolic proces…	binding;nucleic acid binding;RNA binding;snRNA binding
26.4044	26.8272	26.466	26.4853	26.6802	26.4655	26.582	27.1434	26.8094		0.984707		0.811532		0.824135		0.888303	1	-0.0222333	-0.149623	0.163592	0.264136	-0.301281	-1.70397	0.254019	0.402761	-0.279048	-1.33089	56	56	51	317.79	271.9	1230100000	233	21	24	25	18	18	27	35	34	31	A0A494C1L5;P50851;E9PEM5;A0A494BZW2;A0A494C0R9;H0YAC6	Lipopolysaccharide-responsive and beige-like anchor protein	LRBA	tr|A0A494C1L5|A0A494C1L5_HUMAN Lipopolysaccharide-responsive and beige-like anchor protein OS=Homo sapiens OX=9606 GN=LRBA PE=1 SV=1;sp|P50851|LRBA_HUMAN Lipopolysaccharide-responsive and beige-like anchor protein OS=Homo sapiens OX=9606 GN=LRBA PE=1 SV=4;	cellular process;endosome transport;establishment of localization;establishment of localization in cell;intracellular transport;transport;vesicle-mediated transport	binding;lipid binding;phospholipid binding
25.6396	25.558	26.2633	25.4714	24.9709	25.9607	26.6607	26.9728	27.4958		0.783136	+	0.335542		0.42846	GPR30-E2_NES	0.385479	1	-0.352666	-0.973388	0.0137453	0.0483545	-1.57543	-4.19552	0.020757	0.0775613	-1.22277	-3.70431	56	47	47	271.32	261.63	1105700000	162	12	12	14	10	7	15	29	28	35	O15020	Spectrin beta chain, non-erythrocytic 2	SPTBN2	sp|O15020|SPTN2_HUMAN Spectrin beta chain, non-erythrocytic 2 OS=Homo sapiens OX=9606 GN=SPTBN2 PE=1 SV=3	actin filament capping;adult behavior;anatomical structure morphogenesis;antigen processing and presentation;antigen processing and presentation of exogenous antigen;antigen processing and presentation of exogenous peptide antigen;antigen processing and presentation of exogenous peptide antigen via MHC class II;antigen processing and presentation of peptide antigen;antigen processing and presenta…	actin binding;binding;cytoskeletal protein binding;lipid binding;phospholipid binding;protein binding;structural constituent of cytoskeleton;structural molecule activity
27.3609	27.2075	27.5851	27.409	27.5347	27.5382	27.7171	27.6014	27.608		1.07883		0.902404		0.836463		0.404605	1	0.109472	0.930892	0.0591958	0.129001	-0.148155	-2.6136	0.0902944	0.198819	-0.257626	-2.22316	56	56	56	199.07	316.82	2237800000	313	31	34	29	28	21	31	49	45	45	Q7KZ85	Transcription elongation factor SPT6	SUPT6H	sp|Q7KZ85|SPT6H_HUMAN Transcription elongation factor SPT6 OS=Homo sapiens OX=9606 GN=SUPT6H PE=1 SV=2	biological regulation;biosynthetic process;cellular biosynthetic process;cellular component organization;cellular component organization at cellular level;cellular component organization or biogenesis;cellular component organization or biogenesis at cellular level;cellular macromolecule biosynthetic process;cellular macromolecule metabolic process;cellular metabolic process;cellular nitrogen comp…	binding;DNA binding;histone binding;nucleic acid binding;nucleic acid binding transcription factor activity;protein binding;sequence-specific DNA binding transcription factor activity
26.6672	27.0634	27.0204	26.9683	26.7455	26.964	27.2916	27.6713	27.663		0.983209	+	0.637568		0.648456	GPR30-E2_NES	0.874789	1	-0.0244306	-0.167927	0.0110609	0.0434353	-0.64935	-4.47162	0.0243401	0.0860434	-0.624919	-3.525	55	55	55	267.29	323.31	1839600000	272	21	22	31	24	22	30	35	37	50	P12270	Nucleoprotein TPR	TPR	sp|P12270|TPR_HUMAN Nucleoprotein TPR OS=Homo sapiens OX=9606 GN=TPR PE=1 SV=3	biological regulation;biosynthetic process;carbohydrate metabolic process;carbohydrate transport;cell cycle;cell cycle checkpoint;cell cycle phase;cell cycle process;cell division;cell surface receptor linked signaling pathway;cellular biosynthetic process;cellular component disassembly;cellular component disassembly at cellular level;cellular component organization;cellular component organizatio…	binding;chromatin binding;cytoskeletal protein binding;dynein complex binding;enzyme binding;heat shock protein binding;identical protein binding;kinase binding;mitogen-activated protein kinase binding;mRNA binding;nucleic acid binding;nucleocytoplasmic transporter activity;protein binding;protein complex binding;protein dimerization activity;protein homodimerization activity;protein kinase bindi…
27.55	27.6789	27.434	27.4657	27.7013	27.5738	27.5584	27.9254	27.7614		1.01815		0.889961		0.8741		0.804614	1	0.0259444	0.264292	0.253152	0.366518	-0.168186	-1.33379	0.202619	0.342821	-0.194131	-1.52219	55	55	55	174.76	214.33	2348900000	303	32	34	31	33	25	30	36	43	39	P35573	Glycogen debranching enzyme;4-alpha-glucanotransferase;Amylo-alpha-1,6-glucosidase	AGL	sp|P35573|GDE_HUMAN Glycogen debranching enzyme OS=Homo sapiens OX=9606 GN=AGL PE=1 SV=3	alcohol metabolic process;biosynthetic process;carbohydrate biosynthetic process;carbohydrate catabolic process;carbohydrate metabolic process;catabolic process;cellular biosynthetic process;cellular carbohydrate biosynthetic process;cellular carbohydrate catabolic process;cellular carbohydrate metabolic process;cellular glucan metabolic process;cellular macromolecule biosynthetic process;cellula…	4-alpha-glucanotransferase activity;alpha-glucosidase activity;amylo-alpha-1,6-glucosidase activity;binding;carbohydrate binding;catalytic activity;glucosidase activity;glycogen debranching enzyme activity;hydrolase activity;hydrolase activity, acting on glycosyl bonds;hydrolase activity, hydrolyzing O-glycosyl compounds;pattern binding;polysaccharide binding;transferase activity;transferase acti…
29.9517	30.0121	29.8951	30.0734	30.1216	29.9467	29.8462	30.0198	30.0462		1.06753		1.05445		0.987749		0.20389	1	0.0942809	1.51689	0.401532	0.534383	0.0764974	0.937603	0.815206	0.90304	-0.0177835	-0.249579	55	55	55	138.34	323.31	11784000000	427	43	49	49	47	43	44	51	55	46	P53621;A0A3B3IT15;A0A3B3IS84;A0A3B3ISC6;A0A3B3IU89	Coatomer subunit alpha;Xenin;Proxenin	COPA	sp|P53621|COPA_HUMAN Coatomer subunit alpha OS=Homo sapiens OX=9606 GN=COPA PE=1 SV=2;tr|A0A3B3IT15|A0A3B3IT15_HUMAN Coatomer subunit alpha OS=Homo sapiens OX=9606 GN=COPA PE=1 SV=1;tr|A0A3B3IS84|A0A3B3IS84_HUMAN Coatomer subunit alpha OS=Homo sapiens OX=9	biological regulation;body fluid secretion;cellular component organization;cellular component organization at cellular level;cellular component organization or biogenesis;cellular component organization or biogenesis at cellular level;cellular process;COPI coating of Golgi vesicle;digestive system process;establishment of localization;establishment of localization in cell;establishment of protein…	structural molecule activity
21.7633	21.8164	21.9729	21.8619	22.7526	23.3035	21.7162	21.9792	22.4179		1.72727		1.51737		0.878481		0.136926	1	0.788491	1.85668	0.267328	0.380122	0.601573	1.28762	0.431915	0.593719	-0.186918	-0.873047	54	2	2	419.02	7.8282	47216000	16	2	2	2	2	2	1	3	1	1	A0A3B3IUB9			tr|A0A3B3IUB9|A0A3B3IUB9_HUMAN Baculoviral IAP repeat-containing protein 6 (Fragment) OS=Homo sapiens OX=9606 GN=BIRC6 PE=1 SV=1
28.6071	28.8933	29.0497	28.4434	28.7443	28.9174	29.8048	30.1829	30.3138		0.902308	+	0.379254	+	0.420316	GPR30_NES;GPR30-E2_NES	0.477889	1	-0.148308	-0.782048	0.00245963	0.0184904	-1.39876	-6.7878	0.00334869	0.0252865	-1.25045	-6.24628	54	37	3	103.06	319.76	8714600000	275	26	28	30	23	21	29	37	39	42	P12814;A0A804HII9;A0A804HKE2;A0A804HJU8;A0A804HIN7;A0A804HK61;A0A7I2V4Y4;A0A804HLD0;A0A804HLF4	Alpha-actinin-1	ACTN1	sp|P12814|ACTN1_HUMAN Alpha-actinin-1 OS=Homo sapiens OX=9606 GN=ACTN1 PE=1 SV=2;tr|A0A804HII9|A0A804HII9_HUMAN Alpha-actinin-1 OS=Homo sapiens OX=9606 GN=ACTN1 PE=4 SV=1;tr|A0A804HKE2|A0A804HKE2_HUMAN Alpha-actinin-1 OS=Homo sapiens OX=9606 GN=ACTN1 PE=4	actin crosslink formation;actin cytoskeleton organization;actin filament bundle assembly;actin filament organization;actin filament-based process;biological regulation;blood coagulation;cell activation;cell junction assembly;cell junction organization;cell-substrate junction assembly;cellular component assembly;cellular component assembly at cellular level;cellular component organization;cellular…	binding;calcium ion binding;cation binding;cytoskeletal protein binding;double-stranded RNA binding;integrin binding;ion binding;ion channel binding;ligand-dependent nuclear receptor transcription coactivator activity;metal ion binding;nucleic acid binding;protein binding;protein binding transcription factor activity;protein complex binding;receptor binding;RNA binding;transcription coactivator a…
25.073	25.7019	25.0499	24.9808	24.7794	24.8415	28.2208	28.5703	28.3356		0.753828	+	0.087881	+	0.11658	GPR30_NES;GPR30-E2_NES	0.139817	1	-0.407693	-1.83865	7.83943e-06	0	-3.50831	-29.5215	0.000197257	0.00245783	-3.10061	-13.0796	54	52	52	180.58	251.28	2156900000	173	9	13	11	6	8	9	39	45	33	Q13576;F5H7S7;E7EWC2;D6R939	Ras GTPase-activating-like protein IQGAP2	IQGAP2	sp|Q13576|IQGA2_HUMAN Ras GTPase-activating-like protein IQGAP2 OS=Homo sapiens OX=9606 GN=IQGAP2 PE=1 SV=4;tr|F5H7S7|F5H7S7_HUMAN Ras GTPase-activating-like protein IQGAP2 OS=Homo sapiens OX=9606 GN=IQGAP2 PE=1 SV=2;tr|E7EWC2|E7EWC2_HUMAN Ras GTPase-activ	actin cytoskeleton organization;actin filament organization;actin filament-based process;actin nucleation;Arp2/3 complex-mediated actin nucleation;biological regulation;cell surface receptor linked signaling pathway;cellular component organization;cellular component organization at cellular level;cellular component organization or biogenesis;cellular component organization or biogenesis at cellul…	actin binding;actin filament binding;Arp2/3 complex binding;binding;calmodulin binding;cytoskeletal protein binding;enzyme binding;enzyme inhibitor activity;enzyme regulator activity;GTPase binding;GTPase inhibitor activity;GTPase regulator activity;lipid binding;nucleoside-triphosphatase regulator activity;phosphatidylinositol binding;phosphatidylinositol-3,4,5-trisphosphate binding;phospholipid…
28.396	28.4575	28.5649	28.4335	28.2468	28.2877	28.4985	28.6333	28.4668		0.901158		0.864402		0.959212		0.116424	1	-0.150148	-1.99768	0.0510307	0.11739	-0.210225	-2.75654	0.4452	0.607506	-0.0600777	-0.845987	54	54	54	153.89	323.31	4204800000	341	39	37	35	29	33	36	46	44	42	Q92878;A0A1W2PQ90;A0A494C1B7	DNA repair protein RAD50	RAD50	sp|Q92878|RAD50_HUMAN DNA repair protein RAD50 OS=Homo sapiens OX=9606 GN=RAD50 PE=1 SV=1;tr|A0A1W2PQ90|A0A1W2PQ90_HUMAN Zinc-hook domain-containing protein OS=Homo sapiens OX=9606 PE=3 SV=2;tr|A0A494C1B7|A0A494C1B7_HUMAN DNA repair protein RAD50 (Fragment	anatomical structure homeostasis;biological regulation;biosynthetic process;cell cycle process;cellular biosynthetic process;cellular component organization;cellular component organization at cellular level;cellular component organization or biogenesis;cellular component organization or biogenesis at cellular level;cellular macromolecule biosynthetic process;cellular macromolecule metabolic proce…	adenyl nucleotide binding;adenyl ribonucleotide binding;ATP binding;ATPase activity;binding;binding, bridging;catalytic activity;cation binding;DNA binding;hydrolase activity;hydrolase activity, acting on acid anhydrides;hydrolase activity, acting on acid anhydrides, in phosphorus-containing anhydrides;ion binding;metal ion binding;nucleic acid binding;nucleoside-triphosphatase activity;nucleotid…
27.9698	27.9548	28.0794	27.7973	27.7712	28.1504	28.372	28.282	28.3982		0.936246		0.734869	+	0.78491	GPR30_NES	0.500388	1	-0.09504	-0.739985	0.0250602	0.0739656	-0.444441	-3.49275	0.00269526	0.0227904	-0.349401	-6.6232	54	54	48	242.56	273.27	3373200000	306	37	24	37	37	22	30	41	33	45	Q96N67;A0A1B0GWE0	Dedicator of cytokinesis protein 7	DOCK7	sp|Q96N67|DOCK7_HUMAN Dedicator of cytokinesis protein 7 OS=Homo sapiens OX=9606 GN=DOCK7 PE=1 SV=4;tr|A0A1B0GWE0|A0A1B0GWE0_HUMAN Dedicator of cytokinesis protein 7 (Fragment) OS=Homo sapiens OX=9606 GN=DOCK7 PE=1 SV=1	anatomical structure morphogenesis;axonogenesis;biological regulation;cell differentiation;cell part morphogenesis;cell projection morphogenesis;cell projection organization;cellular component morphogenesis;cellular component organization;cellular component organization at cellular level;cellular component organization or biogenesis;cellular component organization or biogenesis at cellular level;…	binding;enzyme binding;enzyme regulator activity;GTPase binding;GTPase regulator activity;guanyl-nucleotide exchange factor activity;nucleoside-triphosphatase regulator activity;protein binding;Rac GTPase binding;Ras GTPase binding;Rho GTPase binding;small GTPase binding
27.2829	27.2312	27.0962	27.1026	27.1869	27.3708	27.1	27.3229	27.0574		1.01159		1.04246		1.03051		0.871924	1	0.0166308	0.171817	0.627176	0.77039	0.0599855	0.525253	0.685123	0.821709	0.0433547	0.436319	54	54	54	294.36	183.49	1659800000	241	26	26	19	27	26	21	34	31	31	Q9UPU5	Ubiquitin carboxyl-terminal hydrolase 24	USP24	sp|Q9UPU5|UBP24_HUMAN Ubiquitin carboxyl-terminal hydrolase 24 OS=Homo sapiens OX=9606 GN=USP24 PE=1 SV=3	biological regulation;catabolic process;cellular catabolic process;cellular macromolecule catabolic process;cellular macromolecule metabolic process;cellular metabolic process;cellular process;cellular protein metabolic process;macromolecule catabolic process;macromolecule metabolic process;macromolecule modification;metabolic process;modification-dependent macromolecule catabolic process;modific…	catalytic activity;cysteine-type endopeptidase activity;cysteine-type peptidase activity;endopeptidase activity;hydrolase activity;peptidase activity;peptidase activity, acting on L-amino acid peptides;small conjugating protein-specific protease activity;ubiquitin-specific protease activity
29.1726	29.1828	29.1666	28.9769	28.89	29.0607	28.939	28.9385	29.1294		0.871653		0.981855		1.12643		0.0160769	1	-0.198174	-4.00397	0.758966	0.863702	-0.0264187	-0.328565	0.0543423	0.142316	0.171755	2.69559	53	53	53	141.44	224.63	5650000000	339	36	32	39	42	37	36	35	43	39	A0A024R4E5;Q00341;H0Y394	Vigilin	HDLBP	tr|A0A024R4E5|A0A024R4E5_HUMAN High density lipoprotein binding protein (Vigilin), isoform CRA_a OS=Homo sapiens OX=9606 GN=HDLBP PE=1 SV=1;sp|Q00341|VIGLN_HUMAN Vigilin OS=Homo sapiens OX=9606 GN=HDLBP PE=1 SV=2;tr|H0Y394|H0Y394_HUMAN Vigilin (Fragment) O	alcohol metabolic process;cholesterol metabolic process;establishment of localization;lipid metabolic process;lipid transport;metabolic process;organic substance transport;primary metabolic process;small molecule metabolic process;steroid metabolic process;sterol metabolic process;transport	binding;lipid binding;nucleic acid binding;RNA binding
29.3819	29.2518	29.4065	29.1508	28.8445	29.2751	29.0045	29.1388	29.139		0.837051		0.99727		1.19141		0.133569	1	-0.256612	-1.87813	0.978182	0.98981	-0.00394376	-0.0290956	0.0183322	0.0722925	0.252668	3.84811	53	53	0	251.89	323.31	6825300000	383	38	35	46	43	37	43	47	44	50	O15027;A0A3F2YNZ0;A0A3F2YNX0	Protein transport protein Sec16A	SEC16A	sp|O15027|SC16A_HUMAN Protein transport protein Sec16A OS=Homo sapiens OX=9606 GN=SEC16A PE=1 SV=4;tr|A0A3F2YNZ0|A0A3F2YNZ0_HUMAN Protein transport protein sec16 OS=Homo sapiens OX=9606 GN=SEC16A PE=1 SV=1;tr|A0A3F2YNX0|A0A3F2YNX0_HUMAN Protein transport p	anatomical structure development;cellular component organization;cellular component organization at cellular level;cellular component organization or biogenesis;cellular component organization or biogenesis at cellular level;cellular process;COPII vesicle coating;developmental process;endoplasmic reticulum organization;establishment of localization;establishment of protein localization;organelle …
30.9012	30.9607	31.2346	30.9575	30.9801	31.0648	31.4081	31.1884	31.4402		0.978529		0.787455		0.804733		0.785742	1	-0.0313129	-0.290683	0.0157646	0.0525459	-0.34473	-4.02762	0.0728959	0.171891	-0.313417	-2.41831	53	53	53	113.08	323.31	27882000000	527	50	53	62	43	54	62	62	67	74	P09874;A0A7I2V3E1	Poly [ADP-ribose] polymerase 1	PARP1	sp|P09874|PARP1_HUMAN Poly [ADP-ribose] polymerase 1 OS=Homo sapiens OX=9606 GN=PARP1 PE=1 SV=4;tr|A0A7I2V3E1|A0A7I2V3E1_HUMAN Poly [ADP-ribose] polymerase OS=Homo sapiens OX=9606 GN=PARP1 PE=1 SV=1	anatomical structure homeostasis;base-excision repair;biological regulation;biosynthetic process;cell differentiation;cell surface receptor linked signaling pathway;cellular biosynthetic process;cellular component organization;cellular component organization at cellular level;cellular component organization or biogenesis;cellular component organization or biogenesis at cellular level;cellular dev…	binding;catalytic activity;cation binding;coenzyme binding;cofactor binding;DNA binding;enzyme binding;identical protein binding;ion binding;kinase binding;metal ion binding;NAD binding;NAD+ ADP-ribosyltransferase activity;nucleic acid binding;nucleotide binding;protein binding;protein kinase binding;protein N-terminus binding;transcription factor binding;transferase activity;transferase activity…
34.3741	34.6334	34.3501	34.4768	34.4546	33.9992	33.9169	33.703	33.189		0.906071		1.63268		1.80194		0.473743	1	-0.142305	-0.789964	0.0565903	0.126541	0.707246	2.65661	0.0222261	0.0813	0.849551	3.62663	53	53	53	129.63	323.31	204340000000	1122	128	135	132	124	122	133	129	112	107	P11498;A0A494C016	Pyruvate carboxylase, mitochondrial	PC	sp|P11498|PYC_HUMAN Pyruvate carboxylase, mitochondrial OS=Homo sapiens OX=9606 GN=PC PE=1 SV=2;tr|A0A494C016|A0A494C016_HUMAN Pyruvate carboxylase, mitochondrial OS=Homo sapiens OX=9606 GN=PC PE=1 SV=1	alcohol biosynthetic process;alcohol metabolic process;biological regulation;biosynthetic process;biotin metabolic process;carbohydrate biosynthetic process;carbohydrate metabolic process;carboxylic acid metabolic process;cellular amide metabolic process;cellular biosynthetic process;cellular carbohydrate biosynthetic process;cellular carbohydrate metabolic process;cellular ketone metabolic proce…	adenyl nucleotide binding;adenyl ribonucleotide binding;ATP binding;binding;biotin binding;biotin carboxylase activity;carboxylic acid binding;catalytic activity;cation binding;DNA binding;ion binding;ligase activity;ligase activity, forming carbon-carbon bonds;ligase activity, forming carbon-nitrogen bonds;metal ion binding;monocarboxylic acid binding;nucleic acid binding;nucleotide binding;puri…
28.0158	28.364	27.9201	27.8418	27.8349	27.8731	28.0434	28.1349	28.0923		0.840856	+	0.84657		1.0068	GPR30-E2_NES	0.138462	1	-0.250069	-1.84705	0.0011446	0.01288	-0.240299	-8.31145	0.946741	0.974751	0.00977008	0.0710864	53	53	52	270.63	323.31	3186600000	286	26	32	30	26	24	26	37	42	43	P46821	Microtubule-associated protein 1B;MAP1B heavy chain;MAP1 light chain LC1	MAP1B	sp|P46821|MAP1B_HUMAN Microtubule-associated protein 1B OS=Homo sapiens OX=9606 GN=MAP1B PE=1 SV=2	anatomical structure development;axon extension;biological regulation;cell growth;cell projection organization;cellular component movement;cellular component organization;cellular component organization at cellular level;cellular component organization or biogenesis;cellular component organization or biogenesis at cellular level;cellular process;cytoskeleton organization;cytoskeleton-dependent in…	structural molecule activity
24.8932	25.0176	24.98	24.2651	24.0907	24.7272	25.7888	26.962	26.6213		0.658561	+	0.233845		0.355085	GPR30-E2_NES	0.0356945	1	-0.602612	-3.11512	0.00615873	0.0303287	-2.09637	-5.28273	0.0130207	0.0557243	-1.49376	-4.26317	53	53	53	357.52	180.34	675370000	135	10	11	10	7	6	11	24	29	27	P49454	Centromere protein F	CENPF	sp|P49454|CENPF_HUMAN Centromere protein F OS=Homo sapiens OX=9606 GN=CENPF PE=1 SV=3	anatomical structure development;biological regulation;biosynthetic process;cell cycle;cell cycle checkpoint;cell cycle phase;cell cycle process;cell differentiation;cell division;cell proliferation;cellular biosynthetic process;cellular component assembly;cellular component assembly at cellular level;cellular component organization;cellular component organization at cellular level;cellular compo…	binding;chromatin binding;dynein binding;identical protein binding;protein binding;protein C-terminus binding;protein dimerization activity;protein homodimerization activity;transcription factor binding
26.8723	26.7791	27.1342	26.7995	26.9422	27.1535	27.3779	27.3983	27.3315		1.02566		0.755681		0.736773		0.816946	1	0.0365582	0.247169	0.018163	0.0578932	-0.40415	-3.85898	0.0151448	0.0606318	-0.440708	-4.07626	53	53	53	276.9	323.31	1749500000	260	32	17	29	27	17	28	42	36	32	Q12923	Tyrosine-protein phosphatase non-receptor type 13	PTPN13	sp|Q12923|PTN13_HUMAN Tyrosine-protein phosphatase non-receptor type 13 OS=Homo sapiens OX=9606 GN=PTPN13 PE=1 SV=2	biological regulation;cellular macromolecule metabolic process;cellular metabolic process;cellular process;cellular protein metabolic process;dephosphorylation;macromolecule metabolic process;macromolecule modification;metabolic process;peptidyl-tyrosine dephosphorylation;phosphate-containing compound metabolic process;phosphorus metabolic process;primary metabolic process;protein dephosphorylati…	catalytic activity;hydrolase activity;hydrolase activity, acting on ester bonds;phosphatase activity;phosphoprotein phosphatase activity;phosphoric ester hydrolase activity;protein tyrosine phosphatase activity
29.0612	28.9485	28.8854	29.1157	29.0702	28.8416	29.4068	29.3114	28.9272		1.03104		0.86695		0.840853		0.679635	1	0.0440954	0.444556	0.290682	0.409009	-0.20598	-1.21645	0.182666	0.318932	-0.250075	-1.61009	52	52	52	132.33	323.31	6735800000	366	34	38	40	36	37	34	55	43	49	A0A669KBL1;Q93009;H3BND8	Ubiquitin carboxyl-terminal hydrolase 7;Ubiquitin carboxyl-terminal hydrolase	USP7	tr|A0A669KBL1|A0A669KBL1_HUMAN Ubiquitin carboxyl-terminal hydrolase 7 OS=Homo sapiens OX=9606 GN=USP7 PE=1 SV=1;sp|Q93009|UBP7_HUMAN Ubiquitin carboxyl-terminal hydrolase 7 OS=Homo sapiens OX=9606 GN=USP7 PE=1 SV=2;tr|H3BND8|H3BND8_HUMAN Ubiquitin carboxy	biological regulation;catabolic process;cellular catabolic process;cellular component organization;cellular component organization at cellular level;cellular component organization or biogenesis;cellular component organization or biogenesis at cellular level;cellular macromolecule catabolic process;cellular macromolecule metabolic process;cellular metabolic process;cellular nitrogen compound meta…	binding;catalytic activity;cysteine-type endopeptidase activity;cysteine-type peptidase activity;endopeptidase activity;enzyme binding;hydrolase activity;p53 binding;peptidase activity;peptidase activity, acting on L-amino acid peptides;protein binding;protein C-terminus binding;small conjugating protein-specific protease activity;transcription factor binding;ubiquitin protein ligase binding;ubiq…
30.3035	30.4087	30.3006	30.4338	30.4343	30.4194	30.5246	30.8212	30.4748		1.06553		0.884113		0.829739		0.0632718	1	0.0915731	2.5505	0.176022	0.278305	-0.177697	-1.64158	0.0772079	0.178138	-0.26927	-2.36539	52	52	52	144.5	323.31	17614000000	496	50	54	49	59	49	46	64	68	57	P41252;A0A804HJN6;A0A0A0MSX9;A0A804HHW9;A0A804HL54;J3KR24;A0A804HJ36;A0A804HIV9;A0A804HKU1;A0A804HK69	Isoleucine--tRNA ligase, cytoplasmic	IARS	sp|P41252|SYIC_HUMAN Isoleucine--tRNA ligase, cytoplasmic OS=Homo sapiens OX=9606 GN=IARS1 PE=1 SV=2;tr|A0A804HJN6|A0A804HJN6_HUMAN Isoleucine--tRNA ligase, cytoplasmic OS=Homo sapiens OX=9606 GN=IARS1 PE=4 SV=1;tr|A0A0A0MSX9|A0A0A0MSX9_HUMAN Isoleucyl-tRN	amine metabolic process;amino acid activation;carboxylic acid metabolic process;cell differentiation;cellular amine metabolic process;cellular amino acid metabolic process;cellular developmental process;cellular ketone metabolic process;cellular macromolecule metabolic process;cellular metabolic process;cellular nitrogen compound metabolic process;cellular process;developmental process;gene expre…	adenyl nucleotide binding;adenyl ribonucleotide binding;aminoacyl-tRNA editing activity;aminoacyl-tRNA ligase activity;ATP binding;binding;carboxylic ester hydrolase activity;catalytic activity;enzyme binding;GTPase binding;hydrolase activity;hydrolase activity, acting on ester bonds;isoleucine-tRNA ligase activity;ligase activity;ligase activity, forming aminoacyl-tRNA and related compounds;liga…
28.3723	28.3301	28.2508	28.169	27.7922	28.138	28.7213	28.8658	29.1829		0.820909	+	0.539504		0.657204	GPR30-E2_NES	0.0865796	1	-0.284706	-2.26105	0.00811113	0.0367778	-0.890293	-4.88844	0.0126641	0.0549656	-0.605587	-4.29815	52	52	52	191.48	323.31	4578200000	322	31	37	30	30	29	34	44	39	48	Q02952	A-kinase anchor protein 12	AKAP12	sp|Q02952|AKA12_HUMAN A-kinase anchor protein 12 OS=Homo sapiens OX=9606 GN=AKAP12 PE=1 SV=4	biological regulation;cell surface receptor linked signaling pathway;cellular process;cellular response to stimulus;establishment of localization;establishment of localization in cell;establishment of protein localization;G-protein coupled receptor protein signaling pathway;intracellular protein transport;intracellular transport;positive regulation of biological process;positive regulation of bio…	adenylate cyclase binding;binding;enzyme binding;protein binding;protein kinase A binding
30.2909	30.3568	30.3494	30.3763	30.4917	30.4335	30.6547	30.8781	30.7151		1.07286	+	0.803592	+	0.749015	GPR30_NES;GPR30-E2_NES	0.0612464	1	0.101468	2.58125	0.0133713	0.0474915	-0.315465	-4.22988	0.00396791	0.0279015	-0.416934	-5.96448	52	52	52	124.34	323.31	18144000000	414	43	43	50	48	37	41	49	52	51	Q92900	Regulator of nonsense transcripts 1	UPF1	sp|Q92900|RENT1_HUMAN Regulator of nonsense transcripts 1 OS=Homo sapiens OX=9606 GN=UPF1 PE=1 SV=2	biological regulation;biosynthetic process;catabolic process;cellular biosynthetic process;cellular catabolic process;cellular macromolecule biosynthetic process;cellular macromolecule catabolic process;cellular macromolecule metabolic process;cellular metabolic process;cellular nitrogen compound metabolic process;cellular process;cellular response to stimulus;cellular response to stress;DNA meta…	adenyl nucleotide binding;adenyl ribonucleotide binding;ATP binding;ATPase activity;ATPase activity, coupled;ATP-dependent helicase activity;ATP-dependent RNA helicase activity;binding;catalytic activity;cation binding;chromatin binding;DNA binding;helicase activity;hydrolase activity;hydrolase activity, acting on acid anhydrides;hydrolase activity, acting on acid anhydrides, in phosphorus-contai…
28.8523	28.7341	29.0928	29.0237	28.5942	29.1006	28.9573	28.7054	28.8582		1.00915		1.04672		1.03723		0.948106	1	0.013134	0.0692607	0.723847	0.841817	0.0658747	0.379146	0.702445	0.83324	0.0527407	0.410546	52	52	52	141.54	323.31	5619500000	355	36	40	43	39	35	39	38	46	39	Q9UQE7	Structural maintenance of chromosomes protein 3	SMC3	sp|Q9UQE7|SMC3_HUMAN Structural maintenance of chromosomes protein 3 OS=Homo sapiens OX=9606 GN=SMC3 PE=1 SV=2	biological regulation;cell cycle;cell cycle phase;cell cycle process;cell division;cellular component organization;cellular component organization at cellular level;cellular component organization or biogenesis;cellular component organization or biogenesis at cellular level;cellular macromolecule metabolic process;cellular metabolic process;cellular nitrogen compound metabolic process;cellular pr…	adenyl nucleotide binding;adenyl ribonucleotide binding;ATP binding;binding;catalytic activity;chromatin binding;dynein binding;hydrolase activity;hydrolase activity, acting on acid anhydrides;hydrolase activity, acting on acid anhydrides, in phosphorus-containing anhydrides;microtubule motor activity;motor activity;nucleoside-triphosphatase activity;nucleotide binding;protein binding;protein dim…
26.9004	26.9528	27.2603	27.0599	26.5183	27.2916	27.3555	27.4727	27.616		0.945245		0.695068		0.735331		0.766124	1	-0.0812391	-0.318384	0.0951972	0.176092	-0.524774	-2.17574	0.030484	0.100684	-0.443535	-3.28058	51	51	45	164.88	323.31	1841100000	232	21	25	22	26	14	24	32	34	34	A0A804HJG7;E7ERI8;E7EW49;E3W994;J3KR49;O75122;A0A0U1RQI6	CLIP-associating protein 2	CLASP2	tr|A0A804HJG7|A0A804HJG7_HUMAN CLIP-associating protein 2 OS=Homo sapiens OX=9606 GN=CLASP2 PE=4 SV=1;tr|E7ERI8|E7ERI8_HUMAN CLIP-associating protein 2 OS=Homo sapiens OX=9606 GN=CLASP2 PE=1 SV=1;tr|E7EW49|E7EW49_HUMAN CLIP-associating protein 2 OS=Homo sa	axon guidance;biological regulation;cell cycle;cell cycle phase;cell cycle process;cell division;cell migration;cell motility;cellular component movement;cellular component organization;cellular component organization at cellular level;cellular component organization or biogenesis;cellular component organization or biogenesis at cellular level;cellular process;cellular response to stimulus;chemot…	alpha(1,2)-fucosyltransferase activity;binding;catalytic activity;cytoskeletal protein binding;fucosyltransferase activity;galactoside 2-alpha-L-fucosyltransferase activity;microtubule binding;microtubule plus-end binding;protein binding;transferase activity;transferase activity, transferring glycosyl groups;transferase activity, transferring hexosyl groups;tubulin binding
28.4623	28.7652	28.7999	28.4094	28.4776	28.7261	28.331	28.8664	28.6068		0.908729		0.956835		1.05294		0.39207	1	-0.138078	-0.958544	0.744264	0.854152	-0.0636584	-0.349606	0.712598	0.838933	0.0744197	0.395591	51	51	51	135.65	310.35	4670600000	288	33	36	30	30	29	29	34	33	34	O95347	Structural maintenance of chromosomes protein 2	SMC2	sp|O95347|SMC2_HUMAN Structural maintenance of chromosomes protein 2 OS=Homo sapiens OX=9606 GN=SMC2 PE=1 SV=2	cell cycle;cell cycle process;cell division;cellular component organization;cellular component organization at cellular level;cellular component organization or biogenesis;cellular component organization or biogenesis at cellular level;cellular macromolecular complex subunit organization;cellular macromolecule metabolic process;cellular metabolic process;cellular nitrogen compound metabolic proce…	adenyl nucleotide binding;adenyl ribonucleotide binding;ATP binding;binding;nucleotide binding;protein binding;protein dimerization activity;protein heterodimerization activity;purine nucleotide binding;purine ribonucleoside triphosphate binding;purine ribonucleotide binding;ribonucleotide binding
31.4895	31.0594	31.4033	31.6408	31.2356	31.6759	31.7735	31.358	31.7422		1.14873		0.928441		0.808235		0.358362	1	0.200036	1.03687	0.611003	0.757616	-0.107117	-0.550934	0.176468	0.311183	-0.307154	-1.63943	51	51	51	140.96	323.31	35785000000	607	72	54	64	69	53	68	81	70	76	Q08211	ATP-dependent RNA helicase A	DHX9	sp|Q08211|DHX9_HUMAN ATP-dependent RNA helicase A OS=Homo sapiens OX=9606 GN=DHX9 PE=1 SV=4	biological regulation;cell differentiation;cellular developmental process;cellular macromolecule metabolic process;cellular metabolic process;cellular nitrogen compound metabolic process;cellular process;cellular response to heat;cellular response to stimulus;cellular response to stress;circadian rhythm;CRD-mediated mRNA stabilization;defense response;developmental process;DNA conformation change…	adenyl nucleotide binding;adenyl ribonucleotide binding;ATP binding;ATPase activity;ATPase activity, coupled;ATP-dependent DNA helicase activity;ATP-dependent helicase activity;ATP-dependent RNA helicase activity;binding;catalytic activity;DNA binding;DNA helicase activity;DNA-dependent ATPase activity;helicase activity;hydrolase activity;hydrolase activity, acting on acid anhydrides;hydrolase ac…
27.2626	27.483	27.5068	26.8768	27.3857	27.7818	27.5667	27.6566	27.7606		0.95305		0.804849		0.844498		0.812082	1	-0.0693766	-0.253911	0.30721	0.428253	-0.313211	-1.1693	0.0636859	0.156771	-0.243834	-2.54435	50	50	45	206.44	179.19	1945800000	200	16	19	18	18	16	22	29	35	27	Q92538;A0A669KB10;A0A7P0RGV0;A0A7I2YQM2;A0A669KBG8;A0A7I2V452;A0A7I2V514;A0A7I2V529;A0A7I2V4K2;A0A7I2YQ65;A0A7I2V2L5;A0A7I2V3Y5;A0A7I2V2L4	Golgi-specific brefeldin A-resistance guanine nucleotide exchange factor 1	GBF1	sp|Q92538|GBF1_HUMAN Golgi-specific brefeldin A-resistance guanine nucleotide exchange factor 1 OS=Homo sapiens OX=9606 GN=GBF1 PE=1 SV=2;tr|A0A669KB10|A0A669KB10_HUMAN Golgi-specific brefeldin A-resistance guanine nucleotide exchange factor 1 OS=Homo sapi	biological regulation;cell activation;cell activation involved in immune response;cell chemotaxis;cell migration;cell motility;cellular component disassembly;cellular component disassembly at cellular level;cellular component movement;cellular component organization;cellular component organization at cellular level;cellular component organization or biogenesis;cellular component organization or b…	ARF guanyl-nucleotide exchange factor activity;binding;enzyme regulator activity;GTPase regulator activity;guanyl-nucleotide exchange factor activity;lipid binding;nucleoside-triphosphatase regulator activity;phosphatidylinositol binding;phosphatidylinositol-3,4,5-trisphosphate binding;phosphatidylinositol-3,5-bisphosphate binding;phospholipid binding;small GTPase regulator activity
27.5513	27.2425	27.2785	27.7067	27.2531	27.4802	27.9484	27.3997	27.6904		1.08866		0.870851		0.799931		0.494585	1	0.12255	0.750693	0.386802	0.519078	-0.199503	-0.97039	0.158584	0.289172	-0.322053	-1.73053	50	50	50	217.24	275.88	2278000000	225	19	21	22	22	18	27	34	29	33	A0A6Q8PGB0;P24928	DNA-directed RNA polymerase II subunit RPB1	POLR2A	tr|A0A6Q8PGB0|A0A6Q8PGB0_HUMAN DNA-directed RNA polymerase subunit OS=Homo sapiens OX=9606 GN=POLR2A PE=1 SV=2;sp|P24928|RPB1_HUMAN DNA-directed RNA polymerase II subunit RPB1 OS=Homo sapiens OX=9606 GN=POLR2A PE=1 SV=2	biological regulation;biosynthetic process;cellular biosynthetic process;cellular macromolecule biosynthetic process;cellular macromolecule metabolic process;cellular metabolic process;cellular nitrogen compound metabolic process;cellular process;cellular response to stimulus;cellular response to stress;developmental process;DNA metabolic process;DNA repair;gene expression;macromolecule biosynthe…	binding;catalytic activity;cation binding;DNA binding;DNA-directed RNA polymerase activity;enzyme binding;ion binding;metal ion binding;nucleic acid binding;nucleotidyltransferase activity;protein binding;RNA polymerase activity;RNA-directed RNA polymerase activity;transferase activity;transferase activity, transferring phosphorus-containing groups;ubiquitin protein ligase binding
29.0361	28.9373	28.8287	29.0713	29.1197	28.9945	28.6944	29.0299	29.0478		1.09262		1.10021		1.00695		0.14238	1	0.127792	1.823	0.31689	0.439309	0.137783	1.14276	0.94225	0.972069	0.00999069	0.0770952	50	50	50	140.47	323.31	5848300000	368	38	39	38	44	40	42	44	44	39	P26640;A0A140T936	Valine--tRNA ligase	VARS	sp|P26640|SYVC_HUMAN Valine--tRNA ligase OS=Homo sapiens OX=9606 GN=VARS1 PE=1 SV=4;tr|A0A140T936|A0A140T936_HUMAN Valine--tRNA ligase (Fragment) OS=Homo sapiens OX=9606 GN=VARS1 PE=1 SV=1	amine metabolic process;amino acid activation;carboxylic acid metabolic process;cellular amine metabolic process;cellular amino acid metabolic process;cellular ketone metabolic process;cellular macromolecule metabolic process;cellular metabolic process;cellular nitrogen compound metabolic process;cellular process;gene expression;macromolecule metabolic process;metabolic process;ncRNA metabolic pr…	adenyl nucleotide binding;adenyl ribonucleotide binding;aminoacyl-tRNA editing activity;aminoacyl-tRNA ligase activity;ATP binding;binding;carboxylic ester hydrolase activity;catalytic activity;hydrolase activity;hydrolase activity, acting on ester bonds;ligase activity;ligase activity, forming aminoacyl-tRNA and related compounds;ligase activity, forming carbon-oxygen bonds;nucleotide binding;pu…
26.9949	26.8373	27.5356	27.092	26.9985	27.3949	27.1031	27.1188	27.416		1.02759		0.965389		0.939464		0.879423	1	0.0392717	0.161643	0.762511	0.865657	-0.0508181	-0.323517	0.720598	0.843733	-0.0900898	-0.383883	50	50	50	238.87	263.8	1697400000	240	21	20	27	28	19	26	38	25	36	Q12789	General transcription factor 3C polypeptide 1	GTF3C1	sp|Q12789|TF3C1_HUMAN General transcription factor 3C polypeptide 1 OS=Homo sapiens OX=9606 GN=GTF3C1 PE=1 SV=4	5S class rRNA transcription from RNA polymerase III type 1 promoter;biosynthetic process;cellular biosynthetic process;cellular macromolecule biosynthetic process;cellular macromolecule metabolic process;cellular metabolic process;cellular nitrogen compound metabolic process;cellular process;gene expression;macromolecule biosynthetic process;macromolecule metabolic process;metabolic process;nitro…	binding;DNA binding;nucleic acid binding
27.8265	27.3499	27.7642	27.8562	27.4782	27.7676	27.1122	26.6043	27.3831		1.03796		1.58826		1.53017		0.789275	1	0.0537573	0.285724	0.0590969	0.129105	0.667451	2.61519	0.0877666	0.193374	0.613694	2.24875	50	50	44	304.1	200.07	1897700000	229	30	17	36	30	18	30	25	17	26	Q14573	Inositol 1,4,5-trisphosphate receptor type 3	ITPR3	sp|Q14573|ITPR3_HUMAN Inositol 1,4,5-trisphosphate receptor type 3 OS=Homo sapiens OX=9606 GN=ITPR3 PE=1 SV=2	activation of immune response;activation of innate immune response;activation of phospholipase C activity;behavior;biological regulation;blood coagulation;calcium ion homeostasis;calcium ion transport;calcium ion transport into cytosol;cation homeostasis;cation transport;cell activation;cell surface receptor linked signaling pathway;cellular calcium ion homeostasis;cellular cation homeostasis;cel…	alcohol binding;binding;calcium channel activity;calcium-release channel activity;cation channel activity;cation transmembrane transporter activity;channel activity;gated channel activity;inositol 1,3,4,5 tetrakisphosphate binding;inositol 1,4,5 trisphosphate binding;inositol 1,4,5-trisphosphate-sensitive calcium-release channel activity;inositol hexakisphosphate binding;intracellular ligand-gate…
31.9523	31.6437	31.6045	31.8802	31.8099	31.7919	28.2109	27.6324	28.2807		1.06719	+	13.7941	+	12.9256	GPR30_NES;GPR30-E2_NES	0.453872	1	0.0938187	0.828674	5.27748e-05	0	3.78598	18.2716	9.27306e-05	0.00196364	3.69216	15.8442	50	50	8	106.87	323.31	22294000000	430	57	62	63	62	57	61	24	20	24	Q14697;F5H6X6	Neutral alpha-glucosidase AB	GANAB	sp|Q14697|GANAB_HUMAN Neutral alpha-glucosidase AB OS=Homo sapiens OX=9606 GN=GANAB PE=1 SV=3;tr|F5H6X6|F5H6X6_HUMAN Neutral alpha-glucosidase AB OS=Homo sapiens OX=9606 GN=GANAB PE=1 SV=1	carbohydrate metabolic process;cellular carbohydrate metabolic process;cellular macromolecule metabolic process;cellular metabolic process;cellular process;cellular protein metabolic process;glycosylation;macromolecule glycosylation;macromolecule metabolic process;macromolecule modification;metabolic process;peptidyl-amino acid modification;peptidyl-asparagine modification;post-translational prot…	alpha-glucosidase activity;binding;carbohydrate binding;catalytic activity;glucan 1,3-alpha-glucosidase activity;glucosidase activity;hydrolase activity;hydrolase activity, acting on glycosyl bonds;hydrolase activity, hydrolyzing O-glycosyl compounds
26.2521	26.3504	26.5721	26.3588	26.5992	26.4263	26.5979	26.909	26.6239		1.04962		0.841577		0.801793		0.587647	1	0.0698655	0.588787	0.112425	0.199938	-0.248833	-2.02834	0.0812066	0.182088	-0.318698	-2.31921	50	50	50	186.49	185.47	1151700000	210	15	19	22	20	19	23	30	30	32	Q15058	Kinesin-like protein KIF14	KIF14	sp|Q15058|KIF14_HUMAN Kinesin-like protein KIF14 OS=Homo sapiens OX=9606 GN=KIF14 PE=1 SV=1	activation of protein kinase activity;anatomical structure arrangement;anatomical structure development;anatomical structure morphogenesis;biological adhesion;biological regulation;catabolic process;cell adhesion;cell cycle process;cell morphogenesis;cell morphogenesis involved in differentiation;cell proliferation;cell proliferation in forebrain;cell-substrate adhesion;cellular catabolic process…	adenyl nucleotide binding;adenyl ribonucleotide binding;ATP binding;ATPase activity;binding;catalytic activity;cytoskeletal protein binding;enzyme binding;hydrolase activity;hydrolase activity, acting on acid anhydrides;hydrolase activity, acting on acid anhydrides, in phosphorus-containing anhydrides;kinase binding;microtubule binding;microtubule motor activity;motor activity;nucleoside-triphosp…
31.9997	31.9279	32.4815	31.7955	31.6004	32.2551	32.027	32.1031	32.5051		0.839326		0.796601		0.949096		0.386992	1	-0.252697	-0.96996	0.250359	0.362487	-0.328071	-1.34318	0.758035	0.868769	-0.075374	-0.329892	50	50	47	118.08	323.31	51293000000	633	66	65	80	66	64	72	74	68	78	Q4VCS5;E7ERM3;A6NP16	Angiomotin	AMOT	sp|Q4VCS5|AMOT_HUMAN Angiomotin OS=Homo sapiens OX=9606 GN=AMOT PE=1 SV=1;tr|E7ERM3|E7ERM3_HUMAN Angiomotin OS=Homo sapiens OX=9606 GN=AMOT PE=1 SV=1;tr|A6NP16|A6NP16_HUMAN Angiomotin OS=Homo sapiens OX=9606 GN=AMOT PE=1 SV=1	actin cytoskeleton organization;actin filament-based process;ameboidal cell migration;anatomical structure morphogenesis;biological regulation;blood vessel endothelial cell migration;cell differentiation;cell junction assembly;cell junction organization;cell migration;cell migration involved in gastrulation;cell motility;cell-cell junction assembly;cell-cell junction organization;cellular compone…	angiostatin binding;binding;protein binding;receptor activity
24.9252	24.9656	25.7498	24.7099	24.6228	25.5061	26.218	27.062	27.179		0.830875	+	0.272925		0.328479	GPR30-E2_NES	0.529366	1	-0.267296	-0.687838	0.0105346	0.0422151	-1.87342	-4.53531	0.0165372	0.0648109	-1.60613	-3.97011	50	50	50	402.24	168.92	888900000	165	8	9	18	11	8	12	26	36	37	Q96T58	Msx2-interacting protein	SPEN	sp|Q96T58|MINT_HUMAN Msx2-interacting protein OS=Homo sapiens OX=9606 GN=SPEN PE=1 SV=1	biological regulation;cell surface receptor linked signaling pathway;cellular process;cellular response to stimulus;negative regulation of biological process;negative regulation of biosynthetic process;negative regulation of cellular biosynthetic process;negative regulation of cellular macromolecule biosynthetic process;negative regulation of cellular metabolic process;negative regulation of cell…	binding;DNA binding;nucleic acid binding;nucleic acid binding transcription factor activity;nucleotide binding;protein binding;protein binding transcription factor activity;RNA polymerase II transcription factor binding;RNA polymerase II transcription factor binding transcription factor activity;RNA polymerase II transcription factor binding transcription factor activity involved in negative regu…
NaN	21.5011	21.7121	21.6966	21.8246	23.1817	25.2058	25.3824	25.4174		2.15271	+	0.116556	+	0.054144	GPR30_NES;GPR30-E2_NES	0.177635	1	1.10616	1.63382	0.00294768	0.0216942	-3.1009	-6.46547	0.000985527	0.0170055	-4.20706	-8.64314	50	19	2	198.92	50.661	240850000	47	1	1	4	2	1	6	9	10	13	Q99666	RANBP2-like and GRIP domain-containing protein 5/6	RGPD5	sp|Q99666|RGPD5_HUMAN RANBP2-like and GRIP domain-containing protein 5/6 OS=Homo sapiens OX=9606 GN=RGPD5 PE=1 SV=3	cellular process;establishment of localization;establishment of localization in cell;establishment of protein localization;establishment of protein localization in Golgi;establishment of protein localization to organelle;Golgi vesicle transport;intracellular protein transport;intracellular transport;intra-Golgi vesicle-mediated transport;protein targeting;protein targeting to Golgi;protein transp…
29.1506	29.3256	29.1857	28.9079	29.0805	29.1766	28.9183	29.3766	29.0759		0.89156		0.95357		1.06955		0.156499	1	-0.165597	-1.74185	0.682362	0.814931	-0.0685895	-0.440458	0.539223	0.699799	0.0970071	0.67057	50	50	50	147.18	283.1	6584300000	345	38	40	37	39	33	37	38	46	37	Q9NTJ3;E9PD53	Structural maintenance of chromosomes protein 4;Structural maintenance of chromosomes protein	SMC4	sp|Q9NTJ3|SMC4_HUMAN Structural maintenance of chromosomes protein 4 OS=Homo sapiens OX=9606 GN=SMC4 PE=1 SV=2;tr|E9PD53|E9PD53_HUMAN Structural maintenance of chromosomes protein OS=Homo sapiens OX=9606 GN=SMC4 PE=1 SV=1	cell cycle;cell cycle process;cell division;cellular component organization;cellular component organization at cellular level;cellular component organization or biogenesis;cellular component organization or biogenesis at cellular level;cellular macromolecular complex subunit organization;cellular macromolecule metabolic process;cellular metabolic process;cellular nitrogen compound metabolic proce…	adenyl nucleotide binding;adenyl ribonucleotide binding;ATP binding;binding;nucleotide binding;protein binding;protein dimerization activity;protein heterodimerization activity;purine nucleotide binding;purine ribonucleoside triphosphate binding;purine ribonucleotide binding;ribonucleotide binding
26.2816	27.1008	25.8877	26.055	26.2692	26.1766	25.1906	26.236	24.2446		0.837177		1.92278		2.29674		0.518563	1	-0.256396	-0.707026	0.178321	0.281206	0.943192	1.63054	0.151135	0.278923	1.19959	1.77173	49	37	37	276.54	126.35	699750000	145	18	24	17	11	14	20	14	19	8	O00763	Acetyl-CoA carboxylase 2;Biotin carboxylase	ACACB	sp|O00763|ACACB_HUMAN Acetyl-CoA carboxylase 2 OS=Homo sapiens OX=9606 GN=ACACB PE=1 SV=3	acetyl-CoA metabolic process;amine transport;amino acid transmembrane transport;amino acid transport;betaine transport;biological regulation;biosynthetic process;biotin metabolic process;carboxylic acid biosynthetic process;carboxylic acid metabolic process;carboxylic acid transport;carnitine shuttle;carnitine transport;cation transport;cellular amide metabolic process;cellular biosynthetic proce…	acetyl-CoA carboxylase activity;adenyl nucleotide binding;adenyl ribonucleotide binding;ATP binding;binding;biotin binding;biotin carboxylase activity;carboxylic acid binding;catalytic activity;cation binding;CoA carboxylase activity;ion binding;ligase activity;ligase activity, forming carbon-carbon bonds;ligase activity, forming carbon-nitrogen bonds;metal ion binding;monocarboxylic acid binding…
26.4811	26.2985	26.5411	26.5672	26.5766	26.6105	27.2352	27.2936	27.1773		1.10534	+	0.63701	+	0.576303	GPR30_NES;GPR30-E2_NES	0.123147	1	0.144489	1.94865	5.54435e-05	0	-0.650612	-18.0454	0.00058459	0.0168696	-0.795101	-9.89871	49	49	49	236.83	176.5	1488400000	223	19	14	24	22	21	22	43	31	27	P42356	Phosphatidylinositol 4-kinase alpha	PI4KA	sp|P42356|PI4KA_HUMAN Phosphatidylinositol 4-kinase alpha OS=Homo sapiens OX=9606 GN=PI4KA PE=1 SV=4	actin cytoskeleton organization;actin filament-based process;biological regulation;biosynthetic process;cellular biosynthetic process;cellular component organization;cellular component organization at cellular level;cellular component organization or biogenesis;cellular component organization or biogenesis at cellular level;cellular lipid metabolic process;cellular metabolic process;cellular proc…	1-phosphatidylinositol 4-kinase activity;adenyl nucleotide binding;adenyl ribonucleotide binding;ATP binding;binding;catalytic activity;inositol or phosphatidylinositol kinase activity;kinase activity;lipid kinase activity;nucleotide binding;phosphatidylinositol kinase activity;phosphotransferase activity, alcohol group as acceptor;purine nucleotide binding;purine ribonucleoside triphosphate bind…
26.2127	26.6118	26.4108	25.9493	26.1728	26.3793	26.7667	27.1588	27.1932		0.844045	+	0.546231		0.647158	GPR30-E2_NES	0.222147	1	-0.244608	-1.44433	0.00915199	0.0395808	-0.872417	-4.72289	0.0246504	0.0857741	-0.62781	-3.51096	49	46	46	195.91	323.31	1161100000	204	14	25	27	11	17	21	25	28	36	Q8IWJ2;B8ZZW2	GRIP and coiled-coil domain-containing protein 2	GCC2	sp|Q8IWJ2|GCC2_HUMAN GRIP and coiled-coil domain-containing protein 2 OS=Homo sapiens OX=9606 GN=GCC2 PE=1 SV=4;tr|B8ZZW2|B8ZZW2_HUMAN GRIP and coiled-coil domain-containing protein 2 (Fragment) OS=Homo sapiens OX=9606 GN=GCC2 PE=1 SV=1	biological regulation;cellular component organization;cellular component organization at cellular level;cellular component organization or biogenesis;cellular component organization or biogenesis at cellular level;cellular localization;cellular macromolecule localization;cellular process;cellular protein localization;cytoskeleton organization;endosome transport;establishment of localization;estab…	binding;identical protein binding;protein binding
26.9152	26.8434	27.0784	26.9778	27.0621	27.1487	27.7684	27.8498	27.8347		1.08463	+	0.592655	+	0.546411	GPR30_NES;GPR30-E2_NES	0.241137	1	0.117205	1.37495	0.000166952	0.00454167	-0.754737	-13.6472	0.000294939	0.00663918	-0.871942	-11.8026	49	49	49	196.54	306.39	2072200000	249	26	18	25	23	20	27	35	36	39	Q9ULH0;E9PH70;A0A1W2PPB7;H0Y8E4	Kinase D-interacting substrate of 220 kDa	KIDINS220	sp|Q9ULH0|KDIS_HUMAN Kinase D-interacting substrate of 220 kDa OS=Homo sapiens OX=9606 GN=KIDINS220 PE=1 SV=3;tr|E9PH70|E9PH70_HUMAN Kinase D-interacting substrate of 220 kDa (Fragment) OS=Homo sapiens OX=9606 GN=KIDINS220 PE=1 SV=1;tr|A0A1W2PPB7|A0A1W2PPB	activation of MAPKK activity;activation of protein kinase activity;anatomical structure morphogenesis;biological regulation;cell part morphogenesis;cell projection morphogenesis;cell projection organization;cell surface receptor linked signaling pathway;cellular component morphogenesis;cellular component organization;cellular component organization at cellular level;cellular component organizatio…	binding;enzyme regulator activity;kinase regulator activity;PDZ domain binding;protein binding;protein domain specific binding;protein kinase regulator activity
29.7085	29.6676	30.3528	29.6329	29.3718	30.0996	30.3158	30.2944	30.3819		0.865614		0.646515		0.746887		0.535471	1	-0.208204	-0.677117	0.0426579	0.104428	-0.629243	-2.93366	0.132618	0.253813	-0.421039	-1.88432	49	49	49	299.61	323.31	12462000000	371	40	39	40	37	28	42	49	52	44	Q9UQ35	Serine/arginine repetitive matrix protein 2	SRRM2	sp|Q9UQ35|SRRM2_HUMAN Serine/arginine repetitive matrix protein 2 OS=Homo sapiens OX=9606 GN=SRRM2 PE=1 SV=2	cellular macromolecule metabolic process;cellular metabolic process;cellular nitrogen compound metabolic process;cellular process;macromolecule metabolic process;metabolic process;mRNA metabolic process;mRNA processing;nitrogen compound metabolic process;nuclear mRNA splicing, via spliceosome;nucleic acid metabolic process;nucleobase-containing compound metabolic process;primary metabolic process…	binding;C2H2 zinc finger domain binding;protein binding;protein domain specific binding;protein N-terminus binding
25.5098	25.2624	25.3237	25.4835	25.1397	25.6053	25.363	25.2379	25.2397		1.03109		1.09374		1.06076		0.793683	1	0.0441761	0.279549	0.424311	0.56077	0.129271	0.88884	0.374082	0.529227	0.0850951	0.999579	48	48	48	596.48	112.16	435450000	145	19	10	17	14	13	19	18	22	13	A0A0A0MTC1;A0A0A0MTR7;Q63HN8	E3 ubiquitin-protein ligase RNF213	RNF213	tr|A0A0A0MTC1|A0A0A0MTC1_HUMAN E3 ubiquitin-protein ligase RNF213 OS=Homo sapiens OX=9606 GN=RNF213 PE=1 SV=1;tr|A0A0A0MTR7|A0A0A0MTR7_HUMAN E3 ubiquitin-protein ligase RNF213 OS=Homo sapiens OX=9606 GN=RNF213 PE=1 SV=1;sp|Q63HN8|RN213_HUMAN E3 ubiquitin-p	cellular macromolecule metabolic process;cellular metabolic process;cellular process;cellular protein metabolic process;macromolecule metabolic process;macromolecule modification;metabolic process;primary metabolic process;protein autoubiquitination;protein metabolic process;protein modification by small protein conjugation;protein modification by small protein conjugation or removal;protein modi…	acid-amino acid ligase activity;ATPase activity;binding;catalytic activity;cation binding;hydrolase activity;hydrolase activity, acting on acid anhydrides;hydrolase activity, acting on acid anhydrides, in phosphorus-containing anhydrides;ion binding;ligase activity;ligase activity, forming carbon-nitrogen bonds;metal ion binding;nucleoside-triphosphatase activity;pyrophosphatase activity;small co…
30.1941	29.7039	30.0554	30.1041	29.5842	29.9847	30.1216	29.9704	30.3373		0.937257		0.839662		0.895872		0.685458	1	-0.0934836	-0.435817	0.254994	0.36896	-0.252119	-1.32765	0.429411	0.590512	-0.158635	-0.878223	48	48	42	175.49	323.31	12484000000	390	47	35	45	53	38	37	48	42	45	Q04637;A0A7I2Y1C3;E7EUU4;E9PGM1;E7EX73;C9JF13	Eukaryotic translation initiation factor 4 gamma 1	EIF4G1	sp|Q04637|IF4G1_HUMAN Eukaryotic translation initiation factor 4 gamma 1 OS=Homo sapiens OX=9606 GN=EIF4G1 PE=1 SV=4;tr|A0A7I2Y1C3|A0A7I2Y1C3_HUMAN Eukaryotic translation initiation factor 4 gamma 1 OS=Homo sapiens OX=9606 GN=EIF4G1 PE=1 SV=1;tr|E7EUU4|E7E	biological regulation;biosynthetic process;catabolic process;cell surface receptor linked signaling pathway;cellular biosynthetic process;cellular catabolic process;cellular macromolecule biosynthetic process;cellular macromolecule catabolic process;cellular macromolecule metabolic process;cellular metabolic process;cellular nitrogen compound metabolic process;cellular process;cellular protein me…	binding;nucleic acid binding;RNA binding;translation factor activity, nucleic acid binding;translation initiation factor activity
33.3276	33.3828	33.2548	33.1688	33.0414	33.1395	30.0505	29.3503	29.9365		0.867447	+	10.1083	+	11.6529	GPR30_NES;GPR30-E2_NES	0.0185095	1	-0.205152	-3.83684	0.000110667	0.003	3.33746	15.1498	8.70634e-05	0.00211765	3.54262	16.0993	48	48	46	90.75	323.31	61754000000	812	111	100	112	121	111	116	53	40	48	A0A7P0TAE1;H0YIV0;A0A7P0TAT8;P14625;A0A7P0T823;A0A7P0T917;A0A087WT78;A0A7P0TAY2;A0A7P0TBC2	Endoplasmin	HSP90B1	tr|A0A7P0TAE1|A0A7P0TAE1_HUMAN Endoplasmin OS=Homo sapiens OX=9606 GN=HSP90B1 PE=1 SV=1;tr|H0YIV0|H0YIV0_HUMAN Endoplasmin OS=Homo sapiens OX=9606 GN=HSP90B1 PE=1 SV=2;tr|A0A7P0TAT8|A0A7P0TAT8_HUMAN Endoplasmin OS=Homo sapiens OX=9606 GN=HSP90B1 PE=1 SV=1;	actin cytoskeleton organization;actin filament organization;actin filament-based process;actin rod assembly;activation of immune response;activation of innate immune response;biological regulation;catabolic process;cellular catabolic process;cellular component assembly;cellular component assembly at cellular level;cellular component organization;cellular component organization at cellular level;c…	adenyl nucleotide binding;adenyl ribonucleotide binding;ATP binding;binding;calcium ion binding;cation binding;enzyme binding;ion binding;lipoprotein particle receptor binding;low-density lipoprotein particle receptor binding;metal ion binding;nucleic acid binding;nucleotide binding;phosphatase binding;protein binding;protein phosphatase binding;purine nucleotide binding;purine ribonucleoside tri…
25.1245	26.0478	25.7768	24.9937	25.7479	25.4204	26.3121	27.0247	26.8863		0.833723	+	0.391278		0.469314	GPR30-E2_NES	0.495615	1	-0.26236	-0.748786	0.0118215	0.0445911	-1.35373	-4.38578	0.0356664	0.111263	-1.09137	-3.11594	48	48	48	254.41	181.78	968650000	150	7	11	16	8	10	13	26	27	32	O75165	DnaJ homolog subfamily C member 13	DNAJC13	sp|O75165|DJC13_HUMAN DnaJ homolog subfamily C member 13 OS=Homo sapiens OX=9606 GN=DNAJC13 PE=1 SV=5	biological regulation;cell differentiation;cellular component organization;cellular component organization at cellular level;cellular component organization or biogenesis;cellular component organization or biogenesis at cellular level;cellular developmental process;cellular process;developmental process;endosome organization;establishment of localization;establishment of protein localization;orga…
28.1925	28.1252	28.2735	28.3307	28.1936	28.3315	28.2193	28.2917	28.5122		1.06305		0.962067		0.905005		0.232484	1	0.0882111	1.40586	0.604196	0.751331	-0.0557912	-0.56187	0.215525	0.359452	-0.144002	-1.46993	48	48	48	197.58	308.6	3861400000	263	29	22	30	32	23	28	33	32	34	P52948;A0A3B3ITD8;H7C3P6	Nuclear pore complex protein Nup98-Nup96;Nuclear pore complex protein Nup98;Nuclear pore complex protein Nup96	NUP98	sp|P52948|NUP98_HUMAN Nuclear pore complex protein Nup98-Nup96 OS=Homo sapiens OX=9606 GN=NUP98 PE=1 SV=4;tr|A0A3B3ITD8|A0A3B3ITD8_HUMAN Nuclear pore complex protein Nup98-Nup96 OS=Homo sapiens OX=9606 GN=NUP98 PE=1 SV=1;tr|H7C3P6|H7C3P6_HUMAN Nuclear pore	biological regulation;biosynthetic process;carbohydrate metabolic process;carbohydrate transport;cell cycle;cell cycle process;cell surface receptor linked signaling pathway;cellular biosynthetic process;cellular component assembly;cellular component assembly at cellular level;cellular component disassembly;cellular component disassembly at cellular level;cellular component organization;cellular …	binding;peptide binding;structural constituent of nuclear pore;structural molecule activity;transporter activity
27.2987	27.1817	27.6097	27.4931	27.3783	27.444	27.5589	27.3403	27.8496		1.05344		0.904722		0.858824		0.599724	1	0.0751108	0.569096	0.393538	0.525491	-0.144454	-0.955267	0.323437	0.47733	-0.219565	-1.12524	48	48	48	170.9	306.35	2103200000	284	26	24	30	30	24	37	39	36	38	Q9UIG0	Tyrosine-protein kinase BAZ1B	BAZ1B	sp|Q9UIG0|BAZ1B_HUMAN Tyrosine-protein kinase BAZ1B OS=Homo sapiens OX=9606 GN=BAZ1B PE=1 SV=2	anatomical structure morphogenesis;biological regulation;biosynthetic process;cellular biosynthetic process;cellular component organization;cellular component organization at cellular level;cellular component organization or biogenesis;cellular component organization or biogenesis at cellular level;cellular macromolecule biosynthetic process;cellular macromolecule metabolic process;cellular metab…	acetylcholine receptor regulator activity;adenyl nucleotide binding;adenyl ribonucleotide binding;ATP binding;binding;catalytic activity;cation binding;chromatin binding;histone acetyl-lysine binding;histone binding;histone kinase activity;ion binding;kinase activity;metal ion binding;non-membrane spanning protein tyrosine kinase activity;nucleotide binding;phosphotransferase activity, alcohol gr…
27.3867	27.452	27.3231	27.428	27.6711	27.3674	26.6248	26.5259	26.6751		1.07295	+	1.84069	+	1.71555	GPR30_NES;GPR30-E2_NES	0.367177	1	0.10158	1.01579	0.00101543	0.0109013	0.88025	8.57594	0.000171827	0.00283333	0.778671	13.5476	47	47	47	274.37	322.35	1579200000	226	22	30	26	24	27	29	21	24	23	P11717;A0A7I2V381	Cation-independent mannose-6-phosphate receptor	IGF2R	sp|P11717|MPRI_HUMAN Cation-independent mannose-6-phosphate receptor OS=Homo sapiens OX=9606 GN=IGF2R PE=1 SV=3;tr|A0A7I2V381|A0A7I2V381_HUMAN Cation-independent mannose-6-phosphate receptor OS=Homo sapiens OX=9606 GN=IGF2R PE=1 SV=1	anatomical structure development;anatomical structure morphogenesis;biological regulation;cell surface receptor linked signaling pathway;cellular component organization;cellular component organization or biogenesis;cellular membrane organization;cellular process;cellular response to stimulus;developmental process;endocytosis;enzyme linked receptor protein signaling pathway;establishment of locali…	binding;carbohydrate binding;carboxylic acid binding;catalytic activity;glycoprotein binding;G-protein coupled receptor activity;identical protein binding;insulin-like growth factor-activated receptor activity;isoprenoid binding;kinase activity;lipid binding;mannose binding;molecular transducer activity;monocarboxylic acid binding;monosaccharide binding;phosphoprotein binding;phosphotransferase a…
26.3207	26.1928	26.3274	26.3386	26.3282	26.5878	26.3849	26.2964	26.4943		1.10027		1.01839		0.92558		0.222295	1	0.137857	1.44377	0.809986	0.895339	0.0262871	0.256821	0.19651	0.335576	-0.11157	-1.54812	47	47	47	288.89	239.2	986210000	228	27	18	23	25	21	18	37	32	27	P42345	Serine/threonine-protein kinase mTOR	MTOR	sp|P42345|MTOR_HUMAN Serine/threonine-protein kinase mTOR OS=Homo sapiens OX=9606 GN=MTOR PE=1 SV=1	anatomical structure development;biological regulation;biosynthetic process;catabolic process;cell communication;cell cycle arrest;cell cycle process;cell development;cell growth;cell projection organization;cell surface receptor linked signaling pathway;cellular biosynthetic process;cellular component organization;cellular component organization at cellular level;cellular component organization …	5S rDNA binding;adenyl nucleotide binding;adenyl ribonucleotide binding;ATP binding;binding;catalytic activity;DNA binding;drug binding;kinase activity;nucleic acid binding;nucleotide binding;phosphoprotein binding;phosphotransferase activity, alcohol group as acceptor;protein binding;protein dimerization activity;protein kinase activity;protein serine/threonine kinase activity;purine nucleotide …
26.9567	27.1787	27.3598	27.2181	26.7979	27.1839	27.3865	27.3363	27.9653		0.934005		0.709021		0.75912		0.609807	1	-0.098498	-0.55285	0.1104	0.197204	-0.496099	-2.04432	0.163232	0.295239	-0.397601	-1.70585	47	47	47	274.46	323.31	1791400000	210	15	18	28	17	13	21	28	27	43	Q5UIP0	Telomere-associated protein RIF1	RIF1	sp|Q5UIP0|RIF1_HUMAN Telomere-associated protein RIF1 OS=Homo sapiens OX=9606 GN=RIF1 PE=1 SV=2	biological regulation;cell cycle;cellular process;cellular response to stimulus;cellular response to stress;developmental process;negative regulation of biological process;negative regulation of cell differentiation;negative regulation of cellular process;negative regulation of developmental process;regulation of biological process;regulation of cell differentiation;regulation of cellular process…
27.7506	27.5771	27.6123	27.5482	27.6982	27.5733	27.6067	27.8461	27.6521		0.972584		0.936246		0.962638		0.599403	1	-0.0401052	-0.569616	0.335293	0.459671	-0.0950406	-1.09431	0.57668	0.733568	-0.0549355	-0.606898	47	47	15	194.1	243.18	2485500000	262	27	21	28	27	24	33	33	33	36	Q8IZH2	5-3 exoribonuclease 1	XRN1	sp|Q8IZH2|XRN1_HUMAN 5-3 exoribonuclease 1 OS=Homo sapiens OX=9606 GN=XRN1 PE=1 SV=1	catabolic process;cellular catabolic process;cellular macromolecule catabolic process;cellular macromolecule metabolic process;cellular metabolic process;cellular nitrogen compound metabolic process;cellular process;exonucleolytic nuclear-transcribed mRNA catabolic process involved in deadenylation-dependent decay;gene expression;histone mRNA catabolic process;histone mRNA metabolic process;macro…	5'-3' exonuclease activity;binding;catalytic activity;DNA binding;exonuclease activity;hydrolase activity;hydrolase activity, acting on ester bonds;nuclease activity;nucleic acid binding
27.3378	27.4575	27.1014	27.2303	27.551	27.2594	27.1643	27.7239	27.3924		1.03384		0.946082		0.915114		0.759351	1	0.048015	0.328016	0.698477	0.825859	-0.0799624	-0.41642	0.54398	0.704321	-0.127977	-0.662318	47	47	47	218.68	323.31	1979300000	199	20	22	25	20	18	18	21	31	24	Q9UPY3;A0A7I2YBM0;H0YJZ6	Endoribonuclease Dicer	DICER1	sp|Q9UPY3|DICER_HUMAN Endoribonuclease Dicer OS=Homo sapiens OX=9606 GN=DICER1 PE=1 SV=3;tr|A0A7I2YBM0|A0A7I2YBM0_HUMAN Endoribonuclease Dicer OS=Homo sapiens OX=9606 GN=DICER1 PE=1 SV=1;tr|H0YJZ6|H0YJZ6_HUMAN Endoribonuclease Dicer OS=Homo sapiens OX=9606	anatomical structure development;anatomical structure formation involved in morphogenesis;anatomical structure morphogenesis;angiogenesis;appendage morphogenesis;asymmetric cell division;biological regulation;branching morphogenesis of a tube;cardiac cell development;cardiac muscle cell development;cardiac neural crest cell development involved in heart development;cardiac neural crest cell devel…	adenyl nucleotide binding;adenyl ribonucleotide binding;ATP binding;binding;catalytic activity;cation binding;deoxyribonuclease activity;deoxyribonuclease I activity;double-stranded RNA binding;endodeoxyribonuclease activity;endodeoxyribonuclease activity, producing 5'-phosphomonoesters;endonuclease activity;endonuclease activity, active with either ribo- or deoxyribonucleic acids and producing 5…
27.3743	27.2924	27.2537	27.3508	27.1192	27.4159	27.1455	27.5266	27.3842		0.992071		0.961397		0.969081		0.911255	1	-0.0114854	-0.118673	0.711605	0.834453	-0.0567958	-0.397049	0.717632	0.842718	-0.0453103	-0.388216	46	46	46	203.99	263.47	1879500000	215	27	19	20	27	21	23	29	23	26	A0A804HJA4;J3KN16;Q5VYK3	Proteasome-associated protein ECM29 homolog	KIAA0368;ECM29	tr|A0A804HJA4|A0A804HJA4_HUMAN Proteasome adapter and scaffold protein ECM29 OS=Homo sapiens OX=9606 GN=ECPAS PE=4 SV=1;tr|J3KN16|J3KN16_HUMAN Proteasome adapter and scaffold protein ECM29 OS=Homo sapiens OX=9606 GN=ECPAS PE=1 SV=1;sp|Q5VYK3|ECM29_HUMAN Pr	catabolic process;cellular catabolic process;cellular macromolecule catabolic process;cellular macromolecule metabolic process;cellular metabolic process;cellular process;ER-associated protein catabolic process;macromolecule catabolic process;macromolecule metabolic process;metabolic process;modification-dependent macromolecule catabolic process;modification-dependent protein catabolic process;pr…
28.8823	28.8243	28.655	28.8245	29.0082	28.7156	28.8218	28.7645	28.6536		1.04406		1.07386		1.02855		0.599658	1	0.0622018	0.569202	0.356094	0.481805	0.102809	1.04237	0.654717	0.797615	0.0406075	0.482423	46	46	46	148.09	321.72	5190000000	374	40	35	43	49	39	37	47	42	42	E9PF10;O75694	Nuclear pore complex protein Nup155	NUP155	tr|E9PF10|E9PF10_HUMAN Nuclear pore complex protein Nup155 OS=Homo sapiens OX=9606 GN=NUP155 PE=1 SV=1;sp|O75694|NU155_HUMAN Nuclear pore complex protein Nup155 OS=Homo sapiens OX=9606 GN=NUP155 PE=1 SV=1	biological regulation;biosynthetic process;carbohydrate metabolic process;carbohydrate transport;cell cycle;cell cycle process;cell surface receptor linked signaling pathway;cellular biosynthetic process;cellular component disassembly;cellular component disassembly at cellular level;cellular component organization;cellular component organization at cellular level;cellular component organization o…	structural constituent of nuclear pore;structural molecule activity;transporter activity
28.8893	28.7456	29.2912	29.0072	28.9332	29.3571	29.0915	28.8323	29.3623		1.08956		1.00263		0.92021		0.585896	1	0.123752	0.591664	0.985889	0.992531	0.00378672	0.0188166	0.620293	0.771429	-0.119965	-0.536132	46	46	32	121.9	323.31	6319400000	377	40	34	45	40	39	44	44	40	51	O60264	SWI/SNF-related matrix-associated actin-dependent regulator of chromatin subfamily A member 5	SMARCA5	sp|O60264|SMCA5_HUMAN SWI/SNF-related matrix-associated actin-dependent regulator of chromatin subfamily A member 5 OS=Homo sapiens OX=9606 GN=SMARCA5 PE=1 SV=1	ATP-dependent chromatin remodeling;biological regulation;biosynthetic process;cellular biosynthetic process;cellular component assembly;cellular component assembly at cellular level;cellular component organization;cellular component organization at cellular level;cellular component organization or biogenesis;cellular component organization or biogenesis at cellular level;cellular macromolecular c…	adenyl nucleotide binding;adenyl ribonucleotide binding;ATP binding;ATPase activity;binding;catalytic activity;chromatin binding;DNA binding;helicase activity;hydrolase activity;hydrolase activity, acting on acid anhydrides;hydrolase activity, acting on acid anhydrides, in phosphorus-containing anhydrides;nucleic acid binding;nucleoside-triphosphatase activity;nucleotide binding;purine nucleotide…
26.4616	25.9654	26.7936	26.6078	26.6371	26.8605	26.4569	26.3019	27.0744		1.22684		1.06494		0.868031		0.309358	1	0.29495	1.16334	0.733996	0.847502	0.0907688	0.364414	0.577319	0.734289	-0.204182	-0.605837	46	46	46	254.39	200.28	1086300000	186	24	11	20	25	17	23	27	17	22	O60287	Nucleolar pre-ribosomal-associated protein 1	URB1	sp|O60287|NPA1P_HUMAN Nucleolar pre-ribosomal-associated protein 1 OS=Homo sapiens OX=9606 GN=URB1 PE=1 SV=4
32.2662	32.3492	32.2967	32.3693	32.561	32.382	32.6073	32.7027	32.4979		1.0969		0.891817	+	0.813036	GPR30_NES	0.115148	1	0.133429	2.00734	0.12598	0.216348	-0.16518	-1.92886	0.00952679	0.0482925	-0.298609	-4.66881	46	46	45	95.337	323.31	67910000000	608	67	62	65	67	59	67	74	80	67	P13639	Elongation factor 2	EEF2	sp|P13639|EF2_HUMAN Elongation factor 2 OS=Homo sapiens OX=9606 GN=EEF2 PE=1 SV=4	biological regulation;biosynthetic process;cell differentiation;cellular biosynthetic process;cellular developmental process;cellular macromolecule biosynthetic process;cellular macromolecule metabolic process;cellular metabolic process;cellular process;cellular protein metabolic process;developmental process;gene expression;hemopoietic progenitor cell differentiation;macromolecule biosynthetic p…	binding;catalytic activity;enzyme binding;GTP binding;GTPase activity;guanyl nucleotide binding;guanyl ribonucleotide binding;hydrolase activity;hydrolase activity, acting on acid anhydrides;hydrolase activity, acting on acid anhydrides, in phosphorus-containing anhydrides;kinase binding;nucleic acid binding;nucleoside-triphosphatase activity;nucleotide binding;protein binding;protein kinase bind…
27.5592	27.7011	28.0556	27.3016	27.0685	27.9508	28.5174	28.7988	28.8994		0.794609	+	0.406628	+	0.511734	GPR30_NES;GPR30-E2_NES	0.334373	1	-0.331683	-1.09668	0.0107173	0.0427713	-1.29822	-4.51278	0.00661914	0.0351245	-0.966534	-5.17718	46	45	45	228.86	322.31	3761800000	251	17	22	28	18	18	26	34	44	44	P48634	Protein PRRC2A	PRRC2A	sp|P48634|PRC2A_HUMAN Protein PRRC2A OS=Homo sapiens OX=9606 GN=PRRC2A PE=1 SV=3
25.6972	25.8073	26.0143	25.6971	25.6207	25.8953	27.0147	27.4412	27.4417		0.931804	+	0.338797	+	0.363592	GPR30_NES;GPR30-E2_NES	0.456744	1	-0.101901	-0.822997	0.000681084	0.0117189	-1.56151	-9.51497	0.00100929	0.0165532	-1.45961	-8.58953	46	46	46	162.46	323.31	1237300000	174	16	9	14	14	12	16	30	30	33	Q15075	Early endosome antigen 1	EEA1	sp|Q15075|EEA1_HUMAN Early endosome antigen 1 OS=Homo sapiens OX=9606 GN=EEA1 PE=1 SV=2	cellular component organization;cellular component organization at cellular level;cellular component organization or biogenesis;cellular component organization or biogenesis at cellular level;cellular membrane fusion;cellular membrane organization;cellular process;early endosome to late endosome transport;endocytosis;endosome transport;establishment of localization;establishment of localization i…	1-phosphatidylinositol binding;binding;calmodulin binding;cation binding;GTP-dependent protein binding;identical protein binding;ion binding;lipid binding;metal ion binding;phosphatidylinositol binding;phospholipid binding;protein binding;protein dimerization activity;protein homodimerization activity;transition metal ion binding;zinc ion binding
29.0557	28.6925	28.8302	29.1801	29.166	28.9834	28.9722	28.5575	29.0376		1.18952		1.19258		1.00257		0.112253	1	0.250383	2.02969	0.194327	0.297874	0.254092	1.55759	0.984873	0.993507	0.00370852	0.0201705	46	46	46	148.85	322.03	5786400000	337	34	30	40	46	31	36	42	33	45	Q9BQG0;I3L1L3	Myb-binding protein 1A	MYBBP1A	sp|Q9BQG0|MBB1A_HUMAN Myb-binding protein 1A OS=Homo sapiens OX=9606 GN=MYBBP1A PE=1 SV=2;tr|I3L1L3|I3L1L3_HUMAN Myb-binding protein 1A (Fragment) OS=Homo sapiens OX=9606 GN=MYBBP1A PE=1 SV=1	biological regulation;biosynthetic process;cell communication;cell differentiation;cellular biosynthetic process;cellular developmental process;cellular macromolecule biosynthetic process;cellular macromolecule metabolic process;cellular metabolic process;cellular nitrogen compound metabolic process;cellular process;cellular response to external stimulus;cellular response to extracellular stimulu…	binding;catalytic activity;core promoter binding;DNA binding;DNA polymerase activity;DNA-directed DNA polymerase activity;nucleic acid binding;nucleotidyltransferase activity;protein binding;protein binding transcription factor activity;regulatory region DNA binding;regulatory region nucleic acid binding;sequence-specific DNA binding;transcription cofactor activity;transcription corepressor activ…
29.4761	29.6528	29.3347	29.5453	29.5774	29.4916	29.7272	29.9397	29.8684		1.03542	+	0.808315		0.780661	GPR30-E2_NES	0.626232	1	0.0502211	0.526741	0.0103	0.0411771	-0.307011	-4.56497	0.0324979	0.104856	-0.357232	-3.21294	45	45	7	123.38	323.31	9687200000	400	43	39	34	51	41	38	50	52	52	O14980;A0A7I2V461;A0A7I2V2Y6;A0A7I2V2H0;A0A7I2V3W6;A0A7I2V6B9;A0A7I2V2S3;A0A7I2V488;A0A7I2YQX3	Exportin-1	XPO1	sp|O14980|XPO1_HUMAN Exportin-1 OS=Homo sapiens OX=9606 GN=XPO1 PE=1 SV=1;tr|A0A7I2V461|A0A7I2V461_HUMAN Exportin-1 OS=Homo sapiens OX=9606 GN=XPO1 PE=1 SV=1;tr|A0A7I2V2Y6|A0A7I2V2Y6_HUMAN Exportin-1 OS=Homo sapiens OX=9606 GN=XPO1 PE=1 SV=1;tr|A0A7I2V2H0|	biological regulation;cell cycle;cell surface receptor linked signaling pathway;cellular localization;cellular macromolecule localization;cellular process;cellular protein localization;cellular response to stimulus;enzyme linked receptor protein signaling pathway;establishment of localization;establishment of localization in cell;establishment of organelle localization;establishment of protein lo…	binding;nucleic acid binding;nucleocytoplasmic transporter activity;protein transporter activity;RNA binding;substrate-specific transporter activity;transporter activity
28.2671	28.3888	28.5739	28.305	28.6376	28.2898	29.9773	29.7895	29.7857		1.0006	+	0.368562	+	0.368341	GPR30_NES;GPR30-E2_NES	0.995504	0.999928	0.0008653	0.00599434	0.000377111	0.00616794	-1.44002	-11.082	0.000191565	0.00258228	-1.44089	-13.1776	45	45	2	112.59	323.31	7458300000	274	21	25	30	26	20	27	42	41	42	O43491	Band 4.1-like protein 2	EPB41L2	sp|O43491|E41L2_HUMAN Band 4.1-like protein 2 OS=Homo sapiens OX=9606 GN=EPB41L2 PE=1 SV=1	actin cytoskeleton organization;actin filament-based process;cellular component organization;cellular component organization at cellular level;cellular component organization or biogenesis;cellular component organization or biogenesis at cellular level;cellular process;cortical actin cytoskeleton organization;cortical cytoskeleton organization;cytoskeleton organization;organelle organization	structural molecule activity
34.161	34.2952	34.2349	34.0429	33.9721	34.194	33.9191	33.7208	33.7096		0.894603		1.21967	+	1.36337	GPR30_NES	0.102195	1	-0.16068	-2.11256	0.0385767	0.0991511	0.286495	3.03537	0.00465336	0.0294667	0.447175	5.70955	45	45	40	53.651	323.31	189250000000	789	75	76	91	89	67	91	97	91	112	P08670;B0YJC4;B0YJC5	Vimentin	VIM	sp|P08670|VIME_HUMAN Vimentin OS=Homo sapiens OX=9606 GN=VIM PE=1 SV=4;tr|B0YJC4|B0YJC4_HUMAN Vimentin OS=Homo sapiens OX=9606 GN=VIM PE=1 SV=1;tr|B0YJC5|B0YJC5_HUMAN Vimentin OS=Homo sapiens OX=9606 GN=VIM PE=1 SV=1	actin filament-based movement;actin filament-based process;actin-mediated cell contraction;actin-myosin filament sliding;anatomical structure development;apoptosis;astrocyte development;astrocyte differentiation;Bergmann glial cell differentiation;biological regulation;cell death;cell development;cell differentiation;cellular component disassembly;cellular component disassembly at cellular level;…	binding;double-stranded RNA binding;glycoprotein binding;identical protein binding;nucleic acid binding;protein binding;protein C-terminus binding;RNA binding;scaffold protein binding;structural constituent of cytoskeleton;structural constituent of eye lens;structural molecule activity
27.8972	28.072	27.7709	28.0066	28.4464	27.734	27.8873	28.1296	27.7553		1.10874		1.10056		0.992623		0.544459	1	0.148924	0.66149	0.587471	0.73432	0.138241	0.589075	0.942889	0.97264	-0.0106824	-0.0762407	45	45	45	152.78	323.31	3003900000	235	23	23	28	24	29	29	26	30	23	P52701;A0A494C0M1;A0A087WWJ1	DNA mismatch repair protein Msh6	MSH6	sp|P52701|MSH6_HUMAN DNA mismatch repair protein Msh6 OS=Homo sapiens OX=9606 GN=MSH6 PE=1 SV=2;tr|A0A494C0M1|A0A494C0M1_HUMAN DNA mismatch repair protein OS=Homo sapiens OX=9606 GN=MSH6 PE=1 SV=1;tr|A0A087WWJ1|A0A087WWJ1_HUMAN DNA mismatch repair protein	B cell activation;B cell activation involved in immune response;biological regulation;cell activation;cell activation involved in immune response;cell cycle process;cellular macromolecule metabolic process;cellular metabolic process;cellular nitrogen compound metabolic process;cellular process;cellular response to stimulus;cellular response to stress;determination of adult lifespan;DNA damage res…	adenyl nucleotide binding;adenyl ribonucleotide binding;ATP binding;ATPase activity;ATPase activity, coupled;binding;catalytic activity;chromatin binding;damaged DNA binding;DNA binding;DNA-dependent ATPase activity;double-stranded DNA binding;guanine/thymine mispair binding;histone binding;hydrolase activity;hydrolase activity, acting on acid anhydrides;hydrolase activity, acting on acid anhydri…
25.8815	26.1775	26.6274	25.2296	25.4643	26.3166	27.8471	28.0392	28.4319		0.678923	+	0.184804	+	0.272202	GPR30_NES;GPR30-E2_NES	0.23023	1	-0.558681	-1.4141	0.00282333	0.0210537	-2.43593	-6.541	0.00246886	0.021738	-1.87725	-6.78099	45	45	1	116.53	323.31	1869600000	150	7	10	14	5	8	12	30	28	36	Q6WCQ1;J3KSW8	Myosin phosphatase Rho-interacting protein	MPRIP	sp|Q6WCQ1|MPRIP_HUMAN Myosin phosphatase Rho-interacting protein OS=Homo sapiens OX=9606 GN=MPRIP PE=1 SV=3;tr|J3KSW8|J3KSW8_HUMAN Myosin phosphatase Rho-interacting protein (Fragment) OS=Homo sapiens OX=9606 GN=MPRIP PE=1 SV=1
29.717	29.7115	29.1963	29.8378	29.6833	29.1585	29.9441	30.0965	29.5257		1.01274		0.814764		0.804513		0.94902	1	0.0182667	0.0680389	0.330675	0.454606	-0.295546	-1.10624	0.265701	0.416384	-0.313813	-1.29279	45	45	44	136.37	323.31	10458000000	343	36	31	26	44	36	30	50	52	38	Q86VP6;A0A0C4DGH5	Cullin-associated NEDD8-dissociated protein 1	CAND1	sp|Q86VP6|CAND1_HUMAN Cullin-associated NEDD8-dissociated protein 1 OS=Homo sapiens OX=9606 GN=CAND1 PE=1 SV=2;tr|A0A0C4DGH5|A0A0C4DGH5_HUMAN Cullin-associated NEDD8-dissociated protein 1 (Fragment) OS=Homo sapiens OX=9606 GN=CAND1 PE=1 SV=1	biological regulation;cell differentiation;cellular component assembly;cellular component assembly at cellular level;cellular component organization;cellular component organization at cellular level;cellular component organization or biogenesis;cellular component organization or biogenesis at cellular level;cellular developmental process;cellular macromolecular complex assembly;cellular macromole…
27.6962	27.6568	27.4104	27.7019	27.6596	27.5454	27.4019	27.4536	27.3801		1.03371	+	1.16779		1.1297	GPR30-E2_NES	0.660219	1	0.0478338	0.473993	0.0122598	0.0453434	0.223775	4.33929	0.128543	0.2483	0.175941	1.91137	45	45	45	155.98	197.36	2198900000	263	29	27	28	29	32	26	30	35	27	Q9H2M9	Rab3 GTPase-activating protein non-catalytic subunit	RAB3GAP2	sp|Q9H2M9|RBGPR_HUMAN Rab3 GTPase-activating protein non-catalytic subunit OS=Homo sapiens OX=9606 GN=RAB3GAP2 PE=1 SV=1	biological regulation;establishment of localization;establishment of localization in cell;establishment of protein localization;establishment of protein localization in endoplasmic reticulum membrane;establishment of protein localization in membrane;intracellular protein transport;intracellular transport;positive regulation of catalytic activity;positive regulation of GTPase activity;positive reg…	binding;enzyme activator activity;enzyme binding;enzyme regulator activity;GTPase activator activity;GTPase binding;GTPase regulator activity;nucleoside-triphosphatase regulator activity;protein binding;protein dimerization activity;protein heterodimerization activity;Rab GTPase binding;Ras GTPase binding;small GTPase binding
27.6429	27.1518	27.3913	27.4401	27.3724	27.5383	27.3688	27.2701	27.5794		1.0388		1.0311		0.992589		0.732365	1	0.0549221	0.366776	0.690401	0.82126	0.0441907	0.42843	0.952302	0.977797	-0.0107314	-0.0636515	45	45	45	160.25	320.11	1994300000	231	22	19	24	25	21	24	30	31	35	Q9H6S0	Probable ATP-dependent RNA helicase YTHDC2	YTHDC2	sp|Q9H6S0|YTDC2_HUMAN 3-5 RNA helicase YTHDC2 OS=Homo sapiens OX=9606 GN=YTHDC2 PE=1 SV=2	cellular macromolecule metabolic process;cellular metabolic process;cellular nitrogen compound metabolic process;cellular process;macromolecule metabolic process;metabolic process;nitrogen compound metabolic process;nucleic acid metabolic process;nucleobase-containing compound metabolic process;primary metabolic process;response to chemical stimulus;response to cytokine stimulus;response to inter…	adenyl nucleotide binding;adenyl ribonucleotide binding;ATP binding;ATPase activity;ATPase activity, coupled;ATP-dependent helicase activity;ATP-dependent RNA helicase activity;binding;catalytic activity;enzyme binding;helicase activity;hydrolase activity;hydrolase activity, acting on acid anhydrides;hydrolase activity, acting on acid anhydrides, in phosphorus-containing anhydrides;nucleoside-tri…
27.0152	27.3616	27.4495	26.9149	26.9278	27.2494	27.316	27.8683	27.9778		0.843991		0.619869		0.734449		0.227649	1	-0.244701	-1.42364	0.0410732	0.102153	-0.689966	-2.97175	0.141996	0.265594	-0.445265	-1.82532	44	44	38	160.9	282.33	2109900000	221	25	23	26	20	15	25	27	32	28	O75116;E9PF63;Q14DU5	Rho-associated protein kinase 2	ROCK2	sp|O75116|ROCK2_HUMAN Rho-associated protein kinase 2 OS=Homo sapiens OX=9606 GN=ROCK2 PE=1 SV=4;tr|E9PF63|E9PF63_HUMAN Rho-associated protein kinase 2 OS=Homo sapiens OX=9606 GN=ROCK2 PE=1 SV=1;tr|Q14DU5|Q14DU5_HUMAN Non-specific serine/threonine protein	actin cytoskeleton organization;actin filament-based process;anatomical structure formation involved in morphogenesis;anatomical structure morphogenesis;axon guidance;biological regulation;cell part morphogenesis;cell projection morphogenesis;cell projection organization;cell surface receptor linked signaling pathway;cellular component morphogenesis;cellular component organization;cellular compon…	adenyl nucleotide binding;adenyl ribonucleotide binding;ATP binding;binding;catalytic activity;cation binding;ion binding;kinase activity;metal ion binding;nucleotide binding;phosphotransferase activity, alcohol group as acceptor;protein kinase activity;protein serine/threonine kinase activity;purine nucleotide binding;purine ribonucleoside triphosphate binding;purine ribonucleotide binding;ribon…
32.9201	33.2344	32.7996	32.8725	33.1792	32.817	33.0097	33.4188	32.8767		0.980452		0.904059		0.922084		0.876281	1	-0.0284818	-0.165904	0.503568	0.647142	-0.145512	-0.734154	0.604231	0.757911	-0.11703	-0.561812	44	42	24	83.263	323.31	98932000000	665	67	77	66	70	55	69	80	92	89	P08238	Heat shock protein HSP 90-beta	HSP90AB1	sp|P08238|HS90B_HUMAN Heat shock protein HSP 90-beta OS=Homo sapiens OX=9606 GN=HSP90AB1 PE=1 SV=4	anatomical structure development;axon guidance;biological regulation;cellular macromolecule metabolic process;cellular metabolic process;cellular process;cellular protein metabolic process;cellular response to chemical stimulus;cellular response to cytokine stimulus;cellular response to heat;cellular response to interleukin-4;cellular response to organic substance;cellular response to stimulus;ce…	adenyl nucleotide binding;adenyl ribonucleotide binding;antigen binding;ATP binding;binding;double-stranded RNA binding;enzyme binding;enzyme regulator activity;kinase binding;MHC class II protein complex binding;MHC protein complex binding;nitric-oxide synthase regulator activity;nucleic acid binding;nucleotide binding;protein binding;protein domain specific binding;purine nucleotide binding;pur…
29.1246	29.3871	28.9521	29.095	28.9206	28.9052	29.6761	29.7705	29.3174		0.882093		0.653203		0.740514		0.266722	1	-0.180997	-1.28954	0.0151891	0.0510913	-0.614398	-4.07271	0.0815713	0.182621	-0.433401	-2.31513	44	44	44	123.8	289.96	7499400000	319	32	33	35	22	27	31	50	48	41	P18206	Vinculin	VCL	sp|P18206|VINC_HUMAN Vinculin OS=Homo sapiens OX=9606 GN=VCL PE=1 SV=4	adherens junction assembly;adherens junction organization;anatomical structure morphogenesis;apical junction assembly;axon extension;biological adhesion;biological regulation;blood coagulation;cell activation;cell adhesion;cell growth;cell junction assembly;cell junction organization;cell projection assembly;cell projection organization;cell-cell adhesion;cell-cell junction assembly;cell-cell jun…	actin binding;alpha-catenin binding;beta-catenin binding;binding;cadherin binding;cell adhesion molecule binding;cytoskeletal protein binding;dystroglycan binding;enzyme binding;glycoprotein binding;protein binding;structural molecule activity;ubiquitin protein ligase binding
28.169	28.276	28.5803	28.1758	28.038	28.5306	29.0094	29.3613	29.2548		0.937185	+	0.513946	+	0.548393	GPR30_NES;GPR30-E2_NES	0.65079	1	-0.0935942	-0.488465	0.00594029	0.0289857	-0.960313	-5.33624	0.00580257	0.033632	-0.866718	-5.37122	44	44	34	109.68	323.31	5375300000	239	21	22	22	22	23	22	36	37	34	P33176	Kinesin-1 heavy chain	KIF5B	sp|P33176|KINH_HUMAN Kinesin-1 heavy chain OS=Homo sapiens OX=9606 GN=KIF5B PE=1 SV=1	axon guidance;biological regulation;cellular chemical homeostasis;cellular component disassembly;cellular component disassembly at cellular level;cellular component movement;cellular component organization;cellular component organization at cellular level;cellular component organization or biogenesis;cellular component organization or biogenesis at cellular level;cellular homeostasis;cellular ion…	adenyl nucleotide binding;adenyl ribonucleotide binding;ATP binding;ATPase activity;binding;catalytic activity;cytoskeletal protein binding;hydrolase activity;hydrolase activity, acting on acid anhydrides;hydrolase activity, acting on acid anhydrides, in phosphorus-containing anhydrides;microtubule binding;microtubule motor activity;motor activity;nucleoside-triphosphatase activity;nucleotide bin…
28.1006	28.1006	28.1699	28.2422	28.1323	28.3407	28.1263	28.4096	28.4355		1.08276		0.942543		0.8705		0.1498	1	0.114714	1.77934	0.502218	0.645486	-0.0853691	-0.736626	0.120529	0.238127	-0.200083	-1.9674	44	44	44	157.18	231.34	3718800000	298	27	26	34	35	30	32	39	42	33	Q15021;E7EN77	Condensin complex subunit 1	NCAPD2	sp|Q15021|CND1_HUMAN Condensin complex subunit 1 OS=Homo sapiens OX=9606 GN=NCAPD2 PE=1 SV=3;tr|E7EN77|E7EN77_HUMAN Condensin complex subunit 1 (Fragment) OS=Homo sapiens OX=9606 GN=NCAPD2 PE=1 SV=2	cell cycle;cell cycle process;cell division;cellular component organization;cellular component organization at cellular level;cellular component organization or biogenesis;cellular component organization or biogenesis at cellular level;cellular macromolecule metabolic process;cellular metabolic process;cellular nitrogen compound metabolic process;cellular process;chromosome condensation;chromosom…	binding;histone binding;protein binding
28.0406	28.0991	28.0906	27.9843	27.8173	28.1004	28.5277	28.8355	28.8863		0.926946	+	0.58135	+	0.627167	GPR30_NES;GPR30-E2_NES	0.263401	1	-0.109443	-1.30016	0.00488889	0.0264327	-0.782522	-5.6324	0.00405322	0.0279317	-0.673079	-5.92991	44	44	44	113.67	268.76	3999400000	273	27	27	32	27	24	31	34	35	36	Q9HCE1;Q5JR04	Putative helicase MOV-10	MOV10	sp|Q9HCE1|MOV10_HUMAN Helicase MOV-10 OS=Homo sapiens OX=9606 GN=MOV10 PE=1 SV=2;tr|Q5JR04|Q5JR04_HUMAN RNA helicase OS=Homo sapiens OX=9606 GN=MOV10 PE=1 SV=1	biological regulation;biosynthetic process;cell surface receptor linked signaling pathway;cellular biosynthetic process;cellular macromolecule biosynthetic process;cellular macromolecule metabolic process;cellular metabolic process;cellular nitrogen compound metabolic process;cellular process;cellular response to chemical stimulus;cellular response to fibroblast growth factor stimulus;cellular re…	adenyl nucleotide binding;adenyl ribonucleotide binding;ATP binding;binding;catalytic activity;helicase activity;hydrolase activity;hydrolase activity, acting on acid anhydrides;hydrolase activity, acting on acid anhydrides, in phosphorus-containing anhydrides;nucleoside-triphosphatase activity;nucleotide binding;purine nucleotide binding;purine ribonucleoside triphosphate binding;purine ribonucl…
26.7025	26.58	26.6461	26.8483	26.7142	26.5388	26.6259	26.4814	26.5176		1.04071		1.11637		1.0727		0.582338	1	0.0575644	0.597526	0.185896	0.288024	0.158817	1.59521	0.14492	0.27046	0.101253	1.80779	43	43	43	268.57	219.43	1096500000	197	19	20	24	28	18	22	24	23	19	A2RRP1;H0Y5G7	Neuroblastoma-amplified sequence	NBAS	sp|A2RRP1|NBAS_HUMAN Neuroblastoma-amplified sequence OS=Homo sapiens OX=9606 GN=NBAS PE=1 SV=2;tr|H0Y5G7|H0Y5G7_HUMAN Neuroblastoma-amplified sequence (Fragment) OS=Homo sapiens OX=9606 GN=NBAS PE=1 SV=1	biological regulation;catabolic process;cellular catabolic process;cellular macromolecule catabolic process;cellular macromolecule metabolic process;cellular metabolic process;cellular nitrogen compound metabolic process;cellular process;establishment of localization;establishment of localization in cell;Golgi vesicle transport;intracellular transport;macromolecule catabolic process;macromolecule…
28.9625	28.5583	28.5263	28.8089	28.6501	28.4307	28.7104	28.7351	28.3746		0.964301		1.01623		1.05385		0.783087	1	-0.0524438	-0.294416	0.891504	0.945714	0.0232207	0.145297	0.699362	0.830732	0.0756645	0.415108	43	43	42	123.63	323.31	4881700000	312	36	30	27	38	32	20	42	46	41	O00410;H0Y8C6	Importin-5	IPO5	sp|O00410|IPO5_HUMAN Importin-5 OS=Homo sapiens OX=9606 GN=IPO5 PE=1 SV=4;tr|H0Y8C6|H0Y8C6_HUMAN Importin-5 (Fragment) OS=Homo sapiens OX=9606 GN=IPO5 PE=1 SV=1	biological regulation;cellular process;cellular response to acid;cellular response to amine stimulus;cellular response to amino acid stimulus;cellular response to chemical stimulus;cellular response to endogenous stimulus;cellular response to organic nitrogen;cellular response to organic substance;cellular response to stimulus;establishment of localization;establishment of localization in cell;es…	binding;enzyme binding;enzyme inhibitor activity;enzyme regulator activity;GTPase binding;GTPase inhibitor activity;GTPase regulator activity;nucleoside-triphosphatase regulator activity;protein binding;protein transporter activity;Ran GTPase binding;Ras GTPase binding;small GTPase binding;substrate-specific transporter activity;transporter activity
31.3494	31.3944	30.9647	31.3831	31.5505	31.0782	31.708	31.7052	31.5126		1.0726		0.809633		0.754833		0.630063	1	0.101111	0.520712	0.116658	0.204531	-0.30466	-1.99593	0.0547272	0.142156	-0.405771	-2.68878	43	27	25	84.659	323.31	32656000000	313	33	33	33	38	27	30	43	37	39	P07900	Heat shock protein HSP 90-alpha	HSP90AA1	sp|P07900|HS90A_HUMAN Heat shock protein HSP 90-alpha OS=Homo sapiens OX=9606 GN=HSP90AA1 PE=1 SV=5	apoptosis;axon guidance;biological regulation;cardiac muscle cell apoptosis;cell cycle;cell cycle process;cell death;cell migration;cell motility;cell surface receptor linked signaling pathway;cellular component assembly;cellular component assembly at cellular level;cellular component movement;cellular component organization;cellular component organization at cellular level;cellular component org…	adenyl deoxyribonucleotide binding;adenyl nucleotide binding;adenyl ribonucleotide binding;antigen binding;ATP binding;ATPase activity;binding;catalytic activity;CTP binding;dATP binding;deoxyribonucleotide binding;enzyme binding;enzyme regulator activity;GTP binding;GTPase binding;guanyl nucleotide binding;guanyl ribonucleotide binding;hydrolase activity;hydrolase activity, acting on acid anhydr…
27.4849	28.9156	28.5425	28.8323	28.8509	28.5805	18.9035	NaN	NaN		1.35683	+	298.014	+	219.641	GPR30_NES;GPR30-E2_NES	0.371013	1	0.440236	1.00675	0.00059265	0.00988636	8.21924	9.86374	0.00113062	0.01782	7.779	8.33825	43	43	43	198.04	225.83	2238200000	191	31	37	33	33	27	29	1	0	0	P07942;A0A7I2V4J9;G3XAI2;A0A7I2V5X5;A0A7I2V2T9;A0A7I2V3I5;A0A7I2V682;A0A7I2V3J7;A0A7I2V2J0;A0A7I2V5R0	Laminin subunit beta-1	LAMB1	sp|P07942|LAMB1_HUMAN Laminin subunit beta-1 OS=Homo sapiens OX=9606 GN=LAMB1 PE=1 SV=2;tr|A0A7I2V4J9|A0A7I2V4J9_HUMAN Laminin subunit beta-1 OS=Homo sapiens OX=9606 GN=LAMB1 PE=1 SV=1;tr|G3XAI2|G3XAI2_HUMAN Laminin subunit beta-1 OS=Homo sapiens OX=9606 G	anatomical structure morphogenesis;axon guidance;biological adhesion;biological regulation;cell adhesion;cell differentiation;cell morphogenesis;cell morphogenesis involved in differentiation;cell projection organization;cell-cell adhesion;cell-substrate adhesion;cellular component disassembly;cellular component disassembly at cellular level;cellular component morphogenesis;cellular component org…	binding;extracellular matrix structural constituent;glycolipid binding;glycosphingolipid binding;lipid binding;sphingolipid binding;structural molecule activity
28.9775	28.7726	29.1462	29.1286	28.7519	29.0513	29.2022	29.063	29.1749		1.00824		0.889197		0.881932		0.94376	1	0.0118364	0.075075	0.238842	0.350044	-0.169425	-1.38304	0.193456	0.332278	-0.181261	-1.56139	43	43	4	136.06	268.13	6216400000	328	36	34	32	35	36	32	40	43	40	P55265;A0A7P0Z4F9;A0A7P0Z4K3;A0A3B3ISU1;A0A3B3ISX1	Double-stranded RNA-specific adenosine deaminase	ADAR	sp|P55265|DSRAD_HUMAN Double-stranded RNA-specific adenosine deaminase OS=Homo sapiens OX=9606 GN=ADAR PE=1 SV=4;tr|A0A7P0Z4F9|A0A7P0Z4F9_HUMAN Double-stranded RNA-specific adenosine deaminase OS=Homo sapiens OX=9606 GN=ADAR PE=1 SV=1;tr|A0A7P0Z4K3|A0A7P0Z	adenosine to inosine editing;anatomical structure development;base conversion or substitution editing;biological regulation;cell differentiation;cell surface receptor linked signaling pathway;cellular component assembly;cellular component assembly at cellular level;cellular component organization;cellular component organization at cellular level;cellular component organization or biogenesis;cellu…	adenosine deaminase activity;binding;catalytic activity;cation binding;deaminase activity;DNA binding;double-stranded RNA adenosine deaminase activity;hydrolase activity;hydrolase activity, acting on carbon-nitrogen (but not peptide) bonds;hydrolase activity, acting on carbon-nitrogen (but not peptide) bonds, in cyclic amidines;ion binding;metal ion binding;nucleic acid binding
26.5928	26.5909	26.8663	26.4384	26.4086	26.9855	26.0578	25.9885	26.2954		0.95099		1.41125		1.48398		0.745786	1	-0.0724983	-0.347419	0.0764571	0.151253	0.496973	2.37436	0.011997	0.0535354	0.569471	4.36692	43	38	34	308.06	133.25	951590000	178	15	16	23	24	17	22	19	16	26	Q14571	Inositol 1,4,5-trisphosphate receptor type 2	ITPR2	sp|Q14571|ITPR2_HUMAN Inositol 1,4,5-trisphosphate receptor type 2 OS=Homo sapiens OX=9606 GN=ITPR2 PE=1 SV=2	activation of immune response;activation of innate immune response;activation of phospholipase C activity;biological regulation;blood coagulation;cell activation;cell surface receptor linked signaling pathway;cellular metabolic process;cellular process;cellular response to cAMP;cellular response to chemical stimulus;cellular response to ethanol;cellular response to fibroblast growth factor stimul…	binding;calcium channel activity;calcium ion transmembrane transporter activity;calcium-release channel activity;cation channel activity;cation transmembrane transporter activity;channel activity;divalent inorganic cation transmembrane transporter activity;gated channel activity;inorganic cation transmembrane transporter activity;inositol 1,4,5-trisphosphate-sensitive calcium-release channel acti…
30.308	30.1421	29.6508	30.2047	30.3009	30.004	26.7008	26.1773	25.9485		1.09901	+	14.87	+	13.5303	GPR30_NES;GPR30-E2_NES	0.562269	1	0.136202	0.63105	8.33314e-05	0.00148387	3.89433	16.2789	0.000226102	0.00348837	3.75813	12.6322	43	43	3	139.44	298.54	7085000000	274	42	41	34	46	40	34	16	11	10	Q5JPE7;J3KN36;P69849;A0A7I2V3P4;A0A7I2V4T6;A0A7I2V6B0;A0A7I2V2Z5;A0A7I2V4D7	Nodal modulator 2;Nodal modulator 3	NOMO2;NOMO3	sp|Q5JPE7|NOMO2_HUMAN Nodal modulator 2 OS=Homo sapiens OX=9606 GN=NOMO2 PE=1 SV=1;tr|J3KN36|J3KN36_HUMAN Nodal modulator 3 OS=Homo sapiens OX=9606 GN=NOMO3 PE=1 SV=1;sp|P69849|NOMO3_HUMAN Nodal modulator 3 OS=Homo sapiens OX=9606 GN=NOMO3 PE=1 SV=2;tr|A0A	biological regulation;posttranscriptional regulation of gene expression;protein destabilization;regulation of biological process;regulation of biological quality;regulation of gene expression;regulation of macromolecule metabolic process;regulation of metabolic process;regulation of protein stability	binding;carbohydrate binding
26.9226	27.1114	27.1699	27.1834	27.3428	27.2996	27.1364	27.0996	27.258		1.15454		1.07968		0.935164		0.0791525	1	0.207318	2.34261	0.176668	0.279277	0.110609	1.63846	0.336539	0.491568	-0.0967089	-1.09112	43	43	43	196.04	223.62	1762400000	245	22	21	24	24	31	25	29	36	33	Q5SRE5	Nucleoporin NUP188 homolog	NUP188	sp|Q5SRE5|NU188_HUMAN Nucleoporin NUP188 OS=Homo sapiens OX=9606 GN=NUP188 PE=1 SV=1	biological regulation;biosynthetic process;carbohydrate metabolic process;carbohydrate transport;cell cycle;cell cycle process;cell surface receptor linked signaling pathway;cellular biosynthetic process;cellular component disassembly;cellular component disassembly at cellular level;cellular component organization;cellular component organization at cellular level;cellular component organization o…
30.5131	30.7307	30.3306	30.4901	30.765	30.3358	30.7733	31.0911	30.6134		1.00381		0.81471		0.811614		0.97587	1	0.00549253	0.0321808	0.191523	0.294755	-0.295641	-1.56991	0.173106	0.307601	-0.301133	-1.65579	43	43	43	102	323.31	19027000000	388	42	40	46	42	38	46	47	40	47	Q7KZF4	Staphylococcal nuclease domain-containing protein 1	SND1	sp|Q7KZF4|SND1_HUMAN Staphylococcal nuclease domain-containing protein 1 OS=Homo sapiens OX=9606 GN=SND1 PE=1 SV=1	biological regulation;biosynthetic process;cell differentiation;cellular biosynthetic process;cellular developmental process;cellular macromolecule biosynthetic process;cellular macromolecule metabolic process;cellular metabolic process;cellular nitrogen compound metabolic process;cellular process;developmental process;gene silencing;gene silencing by RNA;macromolecule biosynthetic process;macrom…	catalytic activity;hydrolase activity;hydrolase activity, acting on ester bonds;nuclease activity;protein binding transcription factor activity;transcription cofactor activity;transcription factor binding transcription factor activity
26.6557	26.5628	26.6913	26.7651	26.5319	26.5464	26.6764	26.6122	26.957		0.98479		0.911249		0.925323		0.806714	1	-0.0221119	-0.261369	0.360657	0.485703	-0.134083	-1.03134	0.376308	0.531727	-0.111971	-0.994409	43	43	43	252.5	174.89	1231400000	190	15	17	21	16	14	26	24	27	30	Q8WYP5	Protein ELYS	AHCTF1	sp|Q8WYP5|ELYS_HUMAN Protein ELYS OS=Homo sapiens OX=9606 GN=AHCTF1 PE=1 SV=3	biological regulation;cell cycle;cellular component assembly;cellular component assembly at cellular level;cellular component organization;cellular component organization at cellular level;cellular component organization or biogenesis;cellular component organization or biogenesis at cellular level;cellular macromolecular complex assembly;cellular macromolecular complex subunit organization;cellul…	binding;DNA binding;nucleic acid binding;nucleic acid binding transcription factor activity;sequence-specific DNA binding transcription factor activity
26.0451	26.0748	26.0517	25.9563	25.8226	26.4736	26.0334	26.0571	26.3352		1.01889		0.960777		0.942962		0.898477	1	0.0270017	0.135884	0.806734	0.893078	-0.0577272	-0.261341	0.433012	0.594159	-0.0847289	-0.870788	43	43	43	360.27	112.05	787690000	183	15	20	20	18	22	17	20	19	32	Q96RL7	Vacuolar protein sorting-associated protein 13A	VPS13A	sp|Q96RL7|VP13A_HUMAN Vacuolar protein sorting-associated protein 13A OS=Homo sapiens OX=9606 GN=VPS13A PE=1 SV=2	anatomical structure development;behavior;behavioral interaction between organisms;biological regulation;cellular process;developmental process;endosome transport;establishment of localization;establishment of localization in cell;establishment of protein localization;establishment of protein localization to organelle;establishment of protein localization to vacuole;Golgi to endosome transport;Go…
30.3367	30.325	30.5906	30.4942	30.6968	30.6954	30.3349	30.1057	30.4136		1.1578		1.26933		1.09633		0.126308	1	0.211385	1.9266	0.0395031	0.100079	0.344064	3.01122	0.353858	0.509528	0.132679	1.04782	43	43	41	87.343	323.31	16050000000	333	35	32	40	35	34	39	38	34	46	Q9NR30	Nucleolar RNA helicase 2	DDX21	sp|Q9NR30|DDX21_HUMAN Nucleolar RNA helicase 2 OS=Homo sapiens OX=9606 GN=DDX21 PE=1 SV=5	biosynthetic process;cell differentiation;cellular biosynthetic process;cellular developmental process;cellular macromolecule biosynthetic process;cellular macromolecule metabolic process;cellular metabolic process;cellular nitrogen compound metabolic process;cellular process;developmental process;macromolecule biosynthetic process;macromolecule metabolic process;metabolic process;multi-organism …	adenyl nucleotide binding;adenyl ribonucleotide binding;ATP binding;ATPase activity;ATPase activity, coupled;ATP-dependent helicase activity;ATP-dependent RNA helicase activity;binding;catalytic activity;double-stranded RNA binding;helicase activity;hydrolase activity;hydrolase activity, acting on acid anhydrides;hydrolase activity, acting on acid anhydrides, in phosphorus-containing anhydrides;n…
27.2207	28.0865	27.4661	27.3048	27.6716	27.4473	27.6494	28.2338	27.8247		0.922412		0.743271		0.805791		0.697545	1	-0.116517	-0.417803	0.103162	0.187037	-0.42804	-2.10421	0.372365	0.528036	-0.311523	-1.00358	42	42	41	141.36	193.64	2584400000	234	20	23	23	23	17	25	29	36	38	A0A0G2JH68;O60610;A0A140T8Z0;H9KV28;A0A2R8Y5N1	Protein diaphanous homolog 1	DIAPH1	tr|A0A0G2JH68|A0A0G2JH68_HUMAN Protein diaphanous homolog 1 OS=Homo sapiens OX=9606 GN=DIAPH1 PE=1 SV=1;sp|O60610|DIAP1_HUMAN Protein diaphanous homolog 1 OS=Homo sapiens OX=9606 GN=DIAPH1 PE=1 SV=2;tr|A0A140T8Z0|A0A140T8Z0_HUMAN Protein diaphanous homolog	actin cytoskeleton organization;actin filament organization;actin filament polymerization;actin filament-based process;actin polymerization or depolymerization;biological regulation;cell projection organization;cellular component assembly;cellular component assembly at cellular level;cellular component organization;cellular component organization at cellular level;cellular component organization …	binding;ion channel binding;protein binding;receptor binding
27.5449	27.5665	27.4649	27.2717	27.1212	27.3486	28.3752	28.3696	28.4297		0.824573	+	0.452396	+	0.548643	GPR30_NES;GPR30-E2_NES	0.019403	1	-0.278282	-3.78195	7.95177e-05	0.0015082	-1.14434	-16.473	1.84189e-05	0	-0.866062	-23.8205	42	42	32	174.91	195.82	3112600000	223	23	20	19	16	19	22	34	36	34	A0A0G2JNZ2;A0A0G2JPP5;A0A669KB89;Q14160;A0A0G2JMS7	Protein scribble homolog	SCRIB	tr|A0A0G2JNZ2|A0A0G2JNZ2_HUMAN Protein scribble homolog OS=Homo sapiens OX=9606 GN=SCRIB PE=1 SV=1;tr|A0A0G2JPP5|A0A0G2JPP5_HUMAN Protein scribble homolog OS=Homo sapiens OX=9606 GN=SCRIB PE=1 SV=1;tr|A0A669KB89|A0A669KB89_HUMAN Protein scribble homolog OS	anatomical structure development;anatomical structure formation involved in morphogenesis;anatomical structure morphogenesis;apoptosis;apoptosis involved in morphogenesis;astrocyte cell migration;asymmetric protein localization;auditory receptor cell stereocilium organization;biological adhesion;biological regulation;cell adhesion;cell death;cell migration;cell motility;cell projection organizati…
27.6907	27.6834	27.7024	27.6568	27.7434	27.7142	27.5187	27.9051	27.7958		1.00876		0.97598		0.967509		0.654227	1	0.0125764	0.483176	0.780639	0.875781	-0.0350768	-0.297862	0.700134	0.831212	-0.0476532	-0.413965	42	42	3	150.46	229.53	2424800000	237	23	28	28	24	27	26	24	27	30	A0A494C0R8;K7EIG1;I3L2B0		CLUH	tr|A0A494C0R8|A0A494C0R8_HUMAN Clustered mitochondria protein homolog OS=Homo sapiens OX=9606 GN=CLUH PE=1 SV=1;tr|K7EIG1|K7EIG1_HUMAN Clustered mitochondria protein homolog (Fragment) OS=Homo sapiens OX=9606 GN=CLUH PE=1 SV=2;tr|I3L2B0|I3L2B0_HUMAN Cluste	cellular component organization;cellular component organization at cellular level;cellular component organization or biogenesis;cellular component organization or biogenesis at cellular level;cellular localization;cellular process;intracellular distribution of mitochondria;localization;mitochondrion distribution;mitochondrion localization;mitochondrion organization;organelle localization;organell…
27.2734	27.3938	27.224	27.1999	27.2407	27.4229	27.1022	27.2212	27.1985		0.993638		1.08212		1.08904		0.919068	1	-0.00920741	-0.108172	0.216585	0.327651	0.113856	1.46578	0.11919	0.235977	0.123063	1.97715	42	42	42	228.48	272.45	1684800000	226	25	25	26	29	19	26	24	26	26	A0A6Q8PHK0;A0A6Q8PGG9;Q14669	E3 ubiquitin-protein ligase TRIP12	TRIP12	tr|A0A6Q8PHK0|A0A6Q8PHK0_HUMAN E3 ubiquitin-protein ligase TRIP12 OS=Homo sapiens OX=9606 GN=TRIP12 PE=1 SV=1;tr|A0A6Q8PGG9|A0A6Q8PGG9_HUMAN E3 ubiquitin-protein ligase TRIP12 OS=Homo sapiens OX=9606 GN=TRIP12 PE=1 SV=1;sp|Q14669|TRIPC_HUMAN E3 ubiquitin-p	biological regulation;cellular macromolecule metabolic process;cellular metabolic process;cellular nitrogen compound metabolic process;cellular process;cellular protein metabolic process;cellular response to stimulus;cellular response to stress;developmental process;DNA metabolic process;DNA repair;embryo development;macromolecule metabolic process;macromolecule modification;metabolic process;neg…	acid-amino acid ligase activity;binding;catalytic activity;hormone receptor binding;ligase activity;ligase activity, forming carbon-nitrogen bonds;nuclear hormone receptor binding;protein binding;receptor binding;small conjugating protein ligase activity;thyroid hormone receptor binding;transcription factor binding;ubiquitin-protein ligase activity
22.5208	23.3668	23.3968	21.9393	22.6458	23.8181	25.849	25.2455	25.5223		0.815818	+	0.149909	+	0.183753	GPR30_NES;GPR30-E2_NES	0.659708	1	-0.29368	-0.474774	0.00889455	0.0384071	-2.73784	-4.76163	0.0018966	0.0169606	-2.44416	-7.27512	42	40	20	888.37	99.84	307480000	92	4	8	7	3	4	6	17	23	20	A0A7P0T890;F8W9J4;Q03001;E9PHM6;F6QMI7	Dystonin	DST	tr|A0A7P0T890|A0A7P0T890_HUMAN Dystonin OS=Homo sapiens OX=9606 GN=DST PE=1 SV=1;tr|F8W9J4|F8W9J4_HUMAN Dystonin OS=Homo sapiens OX=9606 GN=DST PE=1 SV=1;sp|Q03001|DYST_HUMAN Dystonin OS=Homo sapiens OX=9606 GN=DST PE=1 SV=4;tr|E9PHM6|E9PHM6_HUMAN Dystonin	biological adhesion;biological regulation;cell adhesion;cell cycle arrest;cell cycle process;cell junction assembly;cell junction organization;cell motility;cell surface receptor linked signaling pathway;cell-substrate junction assembly;cellular component assembly;cellular component assembly at cellular level;cellular component movement;cellular component organization;cellular component organizat…	binding;calcium ion binding;cation binding;cytoskeletal protein binding;identical protein binding;integrin binding;ion binding;metal ion binding;microtubule binding;microtubule plus-end binding;protein binding;protein complex binding;protein C-terminus binding;protein dimerization activity;protein homodimerization activity;receptor binding;tubulin binding
27.0436	27.2025	27.2693	26.7283	26.6029	27.2852	27.406	27.6808	27.7407		0.81243		0.599973		0.738492		0.244961	1	-0.299685	-1.36163	0.0343542	0.0921953	-0.737031	-3.15483	0.0235888	0.08424	-0.437346	-3.55987	42	42	41	221.62	263.02	1977000000	213	15	23	26	16	14	24	27	34	34	O75970;F5H1U9;H0YGQ3	Multiple PDZ domain protein	MPDZ	sp|O75970|MPDZ_HUMAN Multiple PDZ domain protein OS=Homo sapiens OX=9606 GN=MPDZ PE=1 SV=2;tr|F5H1U9|F5H1U9_HUMAN Multiple PDZ domain protein OS=Homo sapiens OX=9606 GN=MPDZ PE=1 SV=1;tr|H0YGQ3|H0YGQ3_HUMAN Multiple PDZ domain protein (Fragment) OS=Homo sa	axon ensheathment;biological adhesion;cell adhesion;cellular process;ensheathment of neurons;myelination;viral reproduction	binding;protein binding;protein C-terminus binding
32.6885	32.909	32.1017	32.7796	33.0283	31.8575	32.0678	31.6887	30.8754		0.992207		2.01555		2.03138		0.980315	1	-0.0112864	-0.0262498	0.113482	0.201413	1.01118	2.02012	0.0744856	0.174445	1.02246	2.3984	42	42	42	80.058	323.31	56016000000	497	55	60	58	55	54	60	57	47	51	P05165;A0A1B0GU58;A0A1B0GUX9;A0A1B0GWI4;A0A1B0GWA1	Propionyl-CoA carboxylase alpha chain, mitochondrial	PCCA	sp|P05165|PCCA_HUMAN Propionyl-CoA carboxylase alpha chain, mitochondrial OS=Homo sapiens OX=9606 GN=PCCA PE=1 SV=4;tr|A0A1B0GU58|A0A1B0GU58_HUMAN Propanoyl-CoA:carbon dioxide ligase subunit alpha (Fragment) OS=Homo sapiens OX=9606 GN=PCCA PE=1 SV=1;tr|A0A	biotin metabolic process;carboxylic acid catabolic process;carboxylic acid metabolic process;catabolic process;cellular amide metabolic process;cellular catabolic process;cellular ketone metabolic process;cellular lipid catabolic process;cellular lipid metabolic process;cellular metabolic process;cellular nitrogen compound metabolic process;cellular process;cofactor metabolic process;fatty acid b…	adenyl nucleotide binding;adenyl ribonucleotide binding;ATP binding;binding;biotin binding;biotin carboxylase activity;carboxylic acid binding;catalytic activity;cation binding;CoA carboxylase activity;enzyme binding;ion binding;ligase activity;ligase activity, forming carbon-carbon bonds;ligase activity, forming carbon-nitrogen bonds;metal ion binding;monocarboxylic acid binding;nucleotide bindi…
27.2805	26.8516	28.3427	27.0633	26.2088	27.6653	27.9171	27.3974	28.0978		0.701043		0.564515		0.805249		0.44977	1	-0.512424	-0.83683	0.15532	0.252906	-0.824917	-1.74833	0.558617	0.717708	-0.312492	-0.637237	42	42	11	263.83	222.22	2271700000	206	23	13	30	20	8	25	31	21	35	P18583	Protein SON	SON	sp|P18583|SON_HUMAN Protein SON OS=Homo sapiens OX=9606 GN=SON PE=1 SV=4	biological regulation;cellular component organization;cellular component organization at cellular level;cellular component organization or biogenesis;cellular component organization or biogenesis at cellular level;cellular macromolecule metabolic process;cellular metabolic process;cellular nitrogen compound metabolic process;cellular process;cytokinesis;cytoskeleton organization;macromolecule met…	binding;DNA binding;nucleic acid binding;RNA binding
29.4606	29.9191	29.5889	29.3098	29.771	29.5223	28.9051	29.5108	29.138		0.919006		1.27433		1.38663		0.557792	1	-0.121854	-0.638639	0.188835	0.2917	0.349733	1.5819	0.10205	0.2141	0.471587	2.11382	42	42	42	120.84	221.29	8066800000	302	28	36	28	32	39	31	34	37	37	P53396	ATP-citrate synthase	ACLY	sp|P53396|ACLY_HUMAN ATP-citrate synthase OS=Homo sapiens OX=9606 GN=ACLY PE=1 SV=3	acyl-CoA biosynthetic process;acyl-CoA metabolic process;acylglycerol biosynthetic process;acylglycerol metabolic process;biological regulation;biosynthetic process;carbohydrate metabolic process;carboxylic acid metabolic process;cellular biosynthetic process;cellular carbohydrate metabolic process;cellular ketone metabolic process;cellular lipid metabolic process;cellular metabolic process;cellu…	acid-thiol ligase activity;adenyl nucleotide binding;adenyl ribonucleotide binding;ATP binding;ATP citrate synthase activity;binding;catalytic activity;cation binding;CoA-ligase activity;cofactor binding;ion binding;ligase activity;ligase activity, forming carbon-sulfur bonds;metal ion binding;nucleotide binding;purine nucleotide binding;purine ribonucleoside triphosphate binding;purine ribonucle…
30.2224	30.1343	29.7904	30.1272	30.0747	29.9185	30.3602	30.4609	30.1449		0.993857		0.822521		0.827605		0.954347	1	-0.00888952	-0.0609173	0.0660591	0.140042	-0.281876	-2.50998	0.166057	0.298935	-0.272986	-1.69121	42	42	42	75.378	237.9	14026000000	294	26	33	33	29	31	30	34	37	41	P54136	Arginine--tRNA ligase, cytoplasmic	RARS	sp|P54136|SYRC_HUMAN Arginine--tRNA ligase, cytoplasmic OS=Homo sapiens OX=9606 GN=RARS1 PE=1 SV=2	amine metabolic process;amino acid activation;arginyl-tRNA aminoacylation;carboxylic acid metabolic process;cellular amine metabolic process;cellular amino acid metabolic process;cellular ketone metabolic process;cellular macromolecule metabolic process;cellular metabolic process;cellular nitrogen compound metabolic process;cellular process;gene expression;macromolecule metabolic process;metaboli…	adenyl nucleotide binding;adenyl ribonucleotide binding;amine binding;amino acid binding;aminoacyl-tRNA ligase activity;arginine binding;arginine-tRNA ligase activity;ATP binding;binding;carboxylic acid binding;catalytic activity;ligase activity;ligase activity, forming aminoacyl-tRNA and related compounds;ligase activity, forming carbon-oxygen bonds;nucleic acid binding;nucleotide binding;purine…
25.2589	25.6639	26.1261	24.3888	25.2617	25.4585	27.4277	27.313	27.608		0.638765	+	0.187734	+	0.293902	GPR30_NES;GPR30-E2_NES	0.192723	1	-0.646644	-1.56461	0.00207501	0.0160944	-2.41324	-7.10322	0.00262429	0.0222945	-1.76659	-6.67085	42	42	37	480.4	222.61	1234800000	140	8	10	15	4	7	9	28	26	33	Q12955;A0A087WTF3;A0A087WZ65	Ankyrin-3	ANK3	sp|Q12955|ANK3_HUMAN Ankyrin-3 OS=Homo sapiens OX=9606 GN=ANK3 PE=1 SV=3;tr|A0A087WTF3|A0A087WTF3_HUMAN Ankyrin-3 (Fragment) OS=Homo sapiens OX=9606 GN=ANK3 PE=1 SV=1;tr|A0A087WZ65|A0A087WZ65_HUMAN Ankyrin-3 (Fragment) OS=Homo sapiens OX=9606 GN=ANK3 PE=1	anatomical structure morphogenesis;axon guidance;axonogenesis;biological regulation;cation homeostasis;cell cycle cytokinesis;cell cycle process;cell part morphogenesis;cell projection morphogenesis;cell projection organization;cellular chemical homeostasis;cellular component assembly;cellular component assembly at cellular level;cellular component morphogenesis;cellular component organization;ce…	binding;binding, bridging;cadherin binding;cell adhesion molecule binding;cytoskeletal protein binding;ion channel binding;protein binding;protein binding, bridging;spectrin binding;structural constituent of cytoskeleton;structural molecule activity
29.1128	28.9632	28.8424	29.2301	28.9256	28.8114	29.4188	29.2899	29.2067		1.01132		0.803216		0.794226		0.917584	1	0.0162398	0.110166	0.0858562	0.165541	-0.316139	-2.26864	0.0289383	0.0972814	-0.332379	-3.33619	42	41	41	109.43	274.87	6660200000	287	27	30	26	32	32	28	37	42	33	Q15029	116 kDa U5 small nuclear ribonucleoprotein component	EFTUD2	sp|Q15029|U5S1_HUMAN 116 kDa U5 small nuclear ribonucleoprotein component OS=Homo sapiens OX=9606 GN=EFTUD2 PE=1 SV=1	cellular macromolecule metabolic process;cellular metabolic process;cellular nitrogen compound metabolic process;cellular process;gene expression;macromolecule metabolic process;metabolic process;mRNA metabolic process;mRNA processing;nitrogen compound metabolic process;nuclear mRNA splicing, via spliceosome;nucleic acid metabolic process;nucleobase-containing compound metabolic process;primary m…	binding;catalytic activity;GTP binding;GTPase activity;guanyl nucleotide binding;guanyl ribonucleotide binding;hydrolase activity;hydrolase activity, acting on acid anhydrides;hydrolase activity, acting on acid anhydrides, in phosphorus-containing anhydrides;nucleoside-triphosphatase activity;nucleotide binding;purine nucleotide binding;purine ribonucleoside triphosphate binding;purine ribonucleo…
29.1178	29.359	29.3364	28.9658	29.0696	29.247	29.5953	29.7888	29.4779		0.884592	+	0.694229		0.784801	GPR30-E2_NES	0.190872	1	-0.176915	-1.5728	0.0125872	0.0464229	-0.526516	-4.30585	0.042332	0.123426	-0.3496	-2.94135	42	42	30	123.51	323.31	8432100000	302	32	33	30	30	29	31	38	45	34	Q6PKG0;A0A0B4J210;E5RH50	La-related protein 1	LARP1	sp|Q6PKG0|LARP1_HUMAN La-related protein 1 OS=Homo sapiens OX=9606 GN=LARP1 PE=1 SV=2;tr|A0A0B4J210|A0A0B4J210_HUMAN La-related protein 1 (Fragment) OS=Homo sapiens OX=9606 GN=LARP1 PE=1 SV=5;tr|E5RH50|E5RH50_HUMAN La-related protein 1 (Fragment) OS=Homo s	biological regulation;cell proliferation;cellular process;cellular response to stimulus;intracellular signal transduction;positive regulation of autophagy;positive regulation of biological process;positive regulation of biosynthetic process;positive regulation of catabolic process;positive regulation of cell communication;positive regulation of cellular biosynthetic process;positive regulation of…	binding;eukaryotic initiation factor 4E binding;mRNA 3'-UTR binding;mRNA 5'-UTR binding;mRNA binding;nucleic acid binding;protein binding;RNA binding;RNA cap binding;translation activator activity;translation initiation factor binding;translation regulator activity;translation regulator activity, nucleic acid binding
26.0305	25.8646	25.6835	25.8335	26.1981	25.9595	25.6419	25.7728	25.7163		1.09999		1.21985		1.10896		0.401214	1	0.137493	0.9383	0.0648463	0.13709	0.286707	2.52736	0.236077	0.382426	0.149214	1.39289	42	42	42	422.39	117.06	600020000	144	15	12	17	19	17	17	15	16	16	Q709C8	Vacuolar protein sorting-associated protein 13C	VPS13C	sp|Q709C8|VP13C_HUMAN Vacuolar protein sorting-associated protein 13C OS=Homo sapiens OX=9606 GN=VPS13C PE=1 SV=1	biological regulation;cellular process;establishment of localization;establishment of localization in cell;establishment of protein localization;establishment of protein localization to organelle;establishment of protein localization to vacuole;intracellular protein transport;intracellular transport;maintenance of location;maintenance of location in cell;maintenance of protein location;maintenanc…
26.6917	26.6857	26.5491	26.6109	26.6009	26.473	26.7791	26.8769	26.8825		0.945714	+	0.820997		0.868124	GPR30-E2_NES	0.278846	1	-0.0805244	-1.25181	0.00692281	0.0324967	-0.284552	-5.11236	0.023714	0.0847086	-0.204027	-3.55397	42	36	36	169.45	224.23	1215400000	187	20	18	20	17	15	21	20	27	29	Q7Z460;F8WA11;H0Y5T1	CLIP-associating protein 1	CLASP1	sp|Q7Z460|CLAP1_HUMAN CLIP-associating protein 1 OS=Homo sapiens OX=9606 GN=CLASP1 PE=1 SV=1;tr|F8WA11|F8WA11_HUMAN CLIP-associating protein 1 OS=Homo sapiens OX=9606 GN=CLASP1 PE=1 SV=2;tr|H0Y5T1|H0Y5T1_HUMAN CLIP-associating protein 1 (Fragment) OS=Homo	axon guidance;biological regulation;cell cycle;cell cycle process;cell division;cellular component organization;cellular component organization at cellular level;cellular component organization or biogenesis;cellular component organization or biogenesis at cellular level;cellular process;cellular response to stimulus;chemotaxis;cytoskeleton organization;establishment of localization;establishment…	binding;cytoskeletal protein binding;kinetochore binding;microtubule binding;microtubule plus-end binding;protein binding;tubulin binding
29.9369	29.9452	29.8814	30.1112	30.0274	29.8815	29.7372	29.5992	29.5466		1.06109	+	1.3005	+	1.22563	GPR30_NES;GPR30-E2_NES	0.28894	1	0.0855414	1.22157	0.0125377	0.0461523	0.379065	4.31085	0.00820801	0.0431715	0.293523	4.87197	42	42	42	93.487	285.42	10346000000	324	37	38	30	38	33	31	38	40	39	Q8N1F7;H3BVG0	Nuclear pore complex protein Nup93	NUP93	sp|Q8N1F7|NUP93_HUMAN Nuclear pore complex protein Nup93 OS=Homo sapiens OX=9606 GN=NUP93 PE=1 SV=2;tr|H3BVG0|H3BVG0_HUMAN Nuclear pore complex protein Nup93 OS=Homo sapiens OX=9606 GN=NUP93 PE=1 SV=1	biological regulation;biosynthetic process;carbohydrate metabolic process;carbohydrate transport;cell cycle;cell cycle process;cell surface receptor linked signaling pathway;cellular biosynthetic process;cellular component assembly;cellular component assembly at cellular level;cellular component disassembly;cellular component disassembly at cellular level;cellular component organization;cellular …	structural constituent of nuclear pore;structural molecule activity
29.3789	29.209	29.4751	29.2277	29.2872	29.5096	28.7851	28.6479	29.1136		0.991154		1.407		1.41956		0.917181	1	-0.0128193	-0.110707	0.0388052	0.0995265	0.492622	3.02935	0.0332882	0.107038	0.505441	3.18773	42	42	42	122.85	323.31	6216300000	289	29	31	34	31	27	33	37	32	35	Q9BSJ8	Extended synaptotagmin-1	ESYT1	sp|Q9BSJ8|ESYT1_HUMAN Extended synaptotagmin-1 OS=Homo sapiens OX=9606 GN=ESYT1 PE=1 SV=1	establishment of localization;lipid transport;organic substance transport;transport	binding;cation binding;ion binding;lipid binding;metal ion binding;phospholipid binding
26.8819	26.6855	27.3851	27.0175	27.0237	27.2921	27.0598	26.9918	27.4401		1.09197		0.964067		0.882865		0.606053	1	0.12694	0.558878	0.766727	0.867476	-0.0527948	-0.317528	0.513046	0.674035	-0.179735	-0.716939	42	42	42	178.7	236.12	1596200000	211	22	17	29	21	20	26	25	22	29	Q9NRL2	Bromodomain adjacent to zinc finger domain protein 1A	BAZ1A	sp|Q9NRL2|BAZ1A_HUMAN Bromodomain adjacent to zinc finger domain protein 1A OS=Homo sapiens OX=9606 GN=BAZ1A PE=1 SV=2	biological regulation;biosynthetic process;cellular biosynthetic process;cellular component organization;cellular component organization at cellular level;cellular component organization or biogenesis;cellular component organization or biogenesis at cellular level;cellular macromolecule biosynthetic process;cellular macromolecule metabolic process;cellular metabolic process;cellular nitrogen comp…	binding;cation binding;ion binding;metal ion binding;transition metal ion binding;zinc ion binding
27.1656	26.8724	27.1845	27.2584	26.7841	27.2399	27.7686	28.1712	28.0596		1.01393	+	0.533788	+	0.526452	GPR30_NES;GPR30-E2_NES	0.919309	1	0.0199649	0.107848	0.00989726	0.0418936	-0.905661	-4.61782	0.00412587	0.0279904	-0.925626	-5.90117	42	42	42	128.79	165.33	2419800000	187	14	19	17	17	11	17	29	32	31	Q9Y2A7	Nck-associated protein 1	NCKAP1	sp|Q9Y2A7|NCKP1_HUMAN Nck-associated protein 1 OS=Homo sapiens OX=9606 GN=NCKAP1 PE=1 SV=1	actin cytoskeleton organization;actin filament-based process;ameboidal cell migration;anatomical structure development;anatomical structure formation involved in morphogenesis;anatomical structure morphogenesis;anterior/posterior axis specification;anterior/posterior axis specification, embryo;anterior/posterior pattern specification;apical protein localization;apoptosis;asymmetric protein locali…	binding;protein binding;protein complex binding
26.1366	25.8445	26.6885	25.9715	26.1563	26.5256	25.647	25.8896	26.3322		0.996287		1.19875		1.20322		0.986414	0.998968	-0.00536664	-0.0181154	0.368719	0.495876	0.261531	1.01214	0.449265	0.611567	0.266897	0.837839	41	27	3	124.33	139.52	791660000	127	14	9	18	15	9	17	16	10	19	B7ZLQ5;P28370	Probable global transcription activator SNF2L1	SMARCA1	tr|B7ZLQ5|B7ZLQ5_HUMAN Probable global transcription activator SNF2L1 OS=Homo sapiens OX=9606 GN=SMARCA1 PE=1 SV=1;sp|P28370|SMCA1_HUMAN Probable global transcription activator SNF2L1 OS=Homo sapiens OX=9606 GN=SMARCA1 PE=1 SV=2	anatomical structure development;ATP-dependent chromatin remodeling;biological regulation;biosynthetic process;brain development;cell differentiation;cellular biosynthetic process;cellular component organization;cellular component organization at cellular level;cellular component organization or biogenesis;cellular component organization or biogenesis at cellular level;cellular developmental proc…	adenyl nucleotide binding;adenyl ribonucleotide binding;ATP binding;ATPase activity;binding;catalytic activity;chromatin binding;DNA binding;helicase activity;hydrolase activity;hydrolase activity, acting on acid anhydrides;hydrolase activity, acting on acid anhydrides, in phosphorus-containing anhydrides;nucleic acid binding;nucleoside-triphosphatase activity;nucleotide binding;purine nucleotide…
28.1755	27.8109	27.9901	28.151	28.2182	28.0958	27.7972	27.5465	27.5455		1.11947	+	1.43916		1.28557	GPR30-E2_NES	0.216466	1	0.16282	1.46624	0.00445757	0.0261619	0.52523	5.77741	0.0544067	0.142442	0.362411	2.69444	41	41	41	133.06	220.9	2715600000	275	30	30	28	36	29	30	30	34	28	C9J2Y9;P30876;C9J4M6	DNA-directed RNA polymerase;DNA-directed RNA polymerase II subunit RPB2	POLR2B	tr|C9J2Y9|C9J2Y9_HUMAN DNA-directed RNA polymerase subunit beta OS=Homo sapiens OX=9606 GN=POLR2B PE=1 SV=2;sp|P30876|RPB2_HUMAN DNA-directed RNA polymerase II subunit RPB2 OS=Homo sapiens OX=9606 GN=POLR2B PE=1 SV=1;tr|C9J4M6|C9J4M6_HUMAN DNA-directed RNA	biological regulation;biosynthetic process;cellular biosynthetic process;cellular macromolecule biosynthetic process;cellular macromolecule metabolic process;cellular metabolic process;cellular nitrogen compound metabolic process;cellular process;cellular response to stimulus;cellular response to stress;developmental process;DNA metabolic process;DNA repair;gene expression;macromolecule biosynthe…	binding;catalytic activity;cation binding;chromatin binding;DNA binding;DNA-directed RNA polymerase activity;ion binding;metal ion binding;nucleic acid binding;nucleoside binding;nucleotidyltransferase activity;ribonucleoside binding;RNA polymerase activity;transferase activity;transferase activity, transferring phosphorus-containing groups
26.5997	26.2244	26.7725	26.6834	26.8504	26.7793	26.7282	26.7943	27.2479		1.18002		0.899746		0.762483		0.230223	1	0.238813	1.41413	0.42155	0.557422	-0.15241	-0.894634	0.164034	0.296135	-0.391223	-1.70167	41	41	40	116.2	152.01	1399300000	202	17	16	26	16	13	21	28	32	33	O94832;K7EIG7;J3QRN6	Unconventional myosin-Id	MYO1D	sp|O94832|MYO1D_HUMAN Unconventional myosin-Id OS=Homo sapiens OX=9606 GN=MYO1D PE=1 SV=2;tr|K7EIG7|K7EIG7_HUMAN Unconventional myosin-Id OS=Homo sapiens OX=9606 GN=MYO1D PE=1 SV=1;tr|J3QRN6|J3QRN6_HUMAN Unconventional myosin-Id OS=Homo sapiens OX=9606 GN=	biological regulation;cellular localization;cellular process;localization;negative regulation of catalytic activity;negative regulation of hydrolase activity;negative regulation of molecular function;negative regulation of phosphatase activity;regulation of biological process;regulation of catalytic activity;regulation of cellular metabolic process;regulation of cellular process;regulation of dep…	actin binding;actin filament binding;actin-dependent ATPase activity;adenyl nucleotide binding;adenyl ribonucleotide binding;ATP binding;ATPase activity;ATPase activity, coupled;binding;calmodulin binding;catalytic activity;cytoskeletal protein binding;hydrolase activity;hydrolase activity, acting on acid anhydrides;hydrolase activity, acting on acid anhydrides, in phosphorus-containing anhydride…
27.1577	27.0328	27.3173	27.1575	27.1045	27.177	27.5088	27.4544	27.7058		0.984236	+	0.752635		0.764689	GPR30-E2_NES	0.801102	1	-0.0229238	-0.269186	0.006672	0.0318387	-0.409978	-5.16564	0.0261381	0.0908645	-0.387054	-3.44649	41	41	1	188.15	323.31	1946600000	252	25	20	32	24	22	29	35	31	34	Q9HBD4;P51532;A0A2R8YGG3;A0A2R8YG32;A0A2R8Y6N0;A0A2R8Y7F3;A0A2R8YDA1;A0A2R8Y6V2;A0A2R8Y526;A0A2R8Y7Y7;A0A2R8Y523	Transcription activator BRG1	SMARCA4	tr|Q9HBD4|Q9HBD4_HUMAN SMARCA4 isoform 2 OS=Homo sapiens OX=9606 GN=SMARCA4 PE=1 SV=1;sp|P51532|SMCA4_HUMAN Transcription activator BRG1 OS=Homo sapiens OX=9606 GN=SMARCA4 PE=1 SV=2;tr|A0A2R8YGG3|A0A2R8YGG3_HUMAN Transcription activator BRG1 (Fragment) OS=	anatomical structure development;anatomical structure formation involved in morphogenesis;anatomical structure morphogenesis;aortic smooth muscle cell differentiation;appendage morphogenesis;ATP-dependent chromatin remodeling;biological regulation;blastocyst growth;blastocyst hatching;cell development;cell differentiation;cell fate determination;cell morphogenesis;cellular component disassembly;c…	adenyl nucleotide binding;adenyl ribonucleotide binding;androgen receptor binding;ATP binding;ATPase activity;ATPase activity, coupled;binding;catalytic activity;chromatin binding;DNA binding;DNA polymerase binding;DNA-dependent ATPase activity;enzyme binding;helicase activity;histone acetyl-lysine binding;histone binding;hormone receptor binding;hydrolase activity;hydrolase activity, acting on a…
29.0874	28.7763	29.022	29.1198	28.7923	28.9395	29.0556	29.2874	29.2206		0.992189		0.848321		0.855		0.936738	1	-0.0113138	-0.0844751	0.112644	0.200439	-0.237318	-2.02663	0.125827	0.243979	-0.226004	-1.92992	41	41	41	110.42	323.31	6362000000	329	41	32	34	43	31	35	40	39	34	P55060	Exportin-2	CSE1L	sp|P55060|XPO2_HUMAN Exportin-2 OS=Homo sapiens OX=9606 GN=CSE1L PE=1 SV=3	apoptosis;cell death;cell proliferation;cellular process;death;establishment of localization;establishment of localization in cell;establishment of protein localization;intracellular protein transport;intracellular transport;nuclear export;nuclear transport;nucleocytoplasmic transport;programmed cell death;protein export from nucleus;protein targeting;protein transport;transport	binding;importin-alpha export receptor activity;nuclear export signal receptor activity;protein binding;protein transporter activity;substrate-specific transporter activity;transporter activity
25.5856	25.6703	25.7769	25.6269	25.6125	25.6465	22.8027	23.4107	24.2762		0.966638	+	4.3837	+	4.53499	GPR30_NES;GPR30-E2_NES	0.433037	1	-0.0489527	-0.870735	0.00756597	0.0353788	2.13215	4.98583	0.00718345	0.0393236	2.1811	5.05942	41	41	41	504.6	110.82	345640000	127	17	18	18	18	17	20	5	5	9	Q07954	Prolow-density lipoprotein receptor-related protein 1;Low-density lipoprotein receptor-related protein 1 85 kDa subunit;Low-density lipoprotein receptor-related protein 1 515 kDa subunit;Low-density lipoprotein receptor-related protein 1 intracellular domain	LRP1	sp|Q07954|LRP1_HUMAN Prolow-density lipoprotein receptor-related protein 1 OS=Homo sapiens OX=9606 GN=LRP1 PE=1 SV=2	activation of protein kinase activity;activation of protein kinase C activity by G-protein coupled receptor protein signaling pathway;aging;alcohol metabolic process;anatomical structure morphogenesis;aorta morphogenesis;apoptotic cell clearance;artery morphogenesis;biological regulation;blood vessel morphogenesis;cell proliferation;cell surface receptor linked signaling pathway;cellular componen…	apolipoprotein binding;binding;calcium ion binding;cation binding;ion binding;lipoprotein particle receptor binding;lipoprotein transporter activity;metal ion binding;protein binding;protein complex binding;protein transporter activity;receptor activity;receptor binding;substrate-specific transporter activity;transporter activity
29.6047	29.5482	29.511	29.6202	29.6492	29.4581	27.6319	27.4696	27.8016		1.01479	+	3.84094	+	3.78495	GPR30_NES;GPR30-E2_NES	0.762233	1	0.0211849	0.323913	6.68859e-05	0.0017037	1.94146	17.2098	4.27549e-05	0	1.92027	19.2687	41	41	41	205.11	323.31	5356100000	281	39	43	41	34	37	32	22	16	17	Q8TEM1	Nuclear pore membrane glycoprotein 210	NUP210	sp|Q8TEM1|PO210_HUMAN Nuclear pore membrane glycoprotein 210 OS=Homo sapiens OX=9606 GN=NUP210 PE=1 SV=3	biological regulation;biosynthetic process;carbohydrate metabolic process;carbohydrate transport;cell cycle;cell cycle process;cell surface receptor linked signaling pathway;cellular biosynthetic process;cellular component disassembly;cellular component disassembly at cellular level;cellular component organization;cellular component organization at cellular level;cellular component organization o…
28.2376	28.3198	28.4044	28.4037	28.1044	28.3095	28.1729	27.9422	28.4718		0.967211		1.05473		1.09049		0.65755	1	-0.0480976	-0.478077	0.686328	0.818528	0.0768751	0.434514	0.48011	0.643421	0.124973	0.77783	41	41	41	128.98	233.35	3473400000	245	22	33	24	28	25	26	36	28	23	Q8WUM0	Nuclear pore complex protein Nup133	NUP133	sp|Q8WUM0|NU133_HUMAN Nuclear pore complex protein Nup133 OS=Homo sapiens OX=9606 GN=NUP133 PE=1 SV=2	anatomical structure development;biological regulation;biosynthetic process;carbohydrate metabolic process;carbohydrate transport;cell cycle;cell cycle process;cell surface receptor linked signaling pathway;cellular biosynthetic process;cellular component disassembly;cellular component disassembly at cellular level;cellular component organization;cellular component organization at cellular level;…	nucleocytoplasmic transporter activity;transporter activity
25.3685	23.5545	24.9183	25.1846	23.7148	23.9162	22.0312	21.0131	22.7976		0.788986		5.00916		6.34886		0.656796	1	-0.341929	-0.479233	0.0283174	0.0808862	2.32457	3.35952	0.0238215	0.0847908	2.6665	3.54893	40	2	2	139.54	47.56	162190000	16	2	2	2	2	2	1	3	1	1	A0A0G2JN29;A0A087X117;Q15155;A0A0G2JP90;A0A087WW46	Nodal modulator 1	NOMO1	tr|A0A0G2JN29|A0A0G2JN29_HUMAN Nodal modulator 1 OS=Homo sapiens OX=9606 GN=NOMO1 PE=1 SV=1;tr|A0A087X117|A0A087X117_HUMAN Nodal modulator 1 OS=Homo sapiens OX=9606 GN=NOMO1 PE=1 SV=1;sp|Q15155|NOMO1_HUMAN Nodal modulator 1 OS=Homo sapiens OX=9606 GN=NOMO1		binding;carbohydrate binding
32.4891	32.0627	32.5722	32.7325	32.2916	32.5123	32.5919	32.1595	32.5331		1.1		1.05993		0.963573		0.534841	1	0.137502	0.678219	0.674784	0.809429	0.0839678	0.451866	0.809532	0.899842	-0.0535342	-0.257452	40	40	31	80.253	257.19	69479000000	475	46	46	52	60	43	50	64	48	66	A0A1X7SBZ2;A0A5H1ZRQ2;Q92841	Probable ATP-dependent RNA helicase DDX17	DDX17	tr|A0A1X7SBZ2|A0A1X7SBZ2_HUMAN RNA helicase OS=Homo sapiens OX=9606 GN=DDX17 PE=1 SV=1;tr|A0A5H1ZRQ2|A0A5H1ZRQ2_HUMAN RNA helicase OS=Homo sapiens OX=9606 GN=DDX17 PE=1 SV=2;sp|Q92841|DDX17_HUMAN Probable ATP-dependent RNA helicase DDX17 OS=Homo sapiens OX	biological regulation;biosynthetic process;cellular biosynthetic process;cellular macromolecule biosynthetic process;cellular macromolecule metabolic process;cellular metabolic process;cellular nitrogen compound metabolic process;cellular process;macromolecule biosynthetic process;macromolecule metabolic process;metabolic process;mRNA metabolic process;mRNA processing;nitrogen compound metabolic …	adenyl nucleotide binding;adenyl ribonucleotide binding;ATP binding;ATPase activity;ATPase activity, coupled;ATP-dependent helicase activity;ATP-dependent RNA helicase activity;binding;catalytic activity;estrogen receptor binding;helicase activity;hormone receptor binding;hydrolase activity;hydrolase activity, acting on acid anhydrides;hydrolase activity, acting on acid anhydrides, in phosphorus-…
30.5026	30.4353	30.7962	30.4517	30.5315	30.5674	30.3955	30.3092	30.6481		0.958484		1.04674		1.09208		0.625734	1	-0.0611744	-0.527526	0.572239	0.719596	0.0659027	0.614297	0.445724	0.608289	0.127077	0.844935	40	40	40	133.68	309.83	15917000000	384	38	35	48	35	32	48	45	47	56	A0A804CF45;O14654	Insulin receptor substrate 4	IRS4	tr|A0A804CF45|A0A804CF45_HUMAN Insulin receptor substrate 4 OS=Homo sapiens OX=9606 GN=IRS4 PE=4 SV=1;sp|O14654|IRS4_HUMAN Insulin receptor substrate 4 OS=Homo sapiens OX=9606 GN=IRS4 PE=1 SV=1	biological regulation;cell surface receptor linked signaling pathway;cellular process;cellular response to chemical stimulus;cellular response to endogenous stimulus;cellular response to hormone stimulus;cellular response to insulin stimulus;cellular response to organic substance;cellular response to peptide hormone stimulus;cellular response to stimulus;enzyme linked receptor protein signaling p…	binding;binding, bridging;enzyme binding;insulin receptor binding;kinase binding;molecular transducer activity;phosphatidylinositol 3-kinase binding;protein binding;protein binding, bridging;protein complex binding;receptor binding;SH3/SH2 adaptor activity;signal transducer activity;signaling adaptor activity
27.7823	27.4514	27.6589	27.8231	27.544	27.6724	27.7225	27.6484	27.6862		1.03456		0.995969		0.962701		0.71669	1	0.0490125	0.389595	0.947677	0.972996	-0.00582759	-0.0698346	0.608732	0.762093	-0.0548401	-0.554573	40	40	35	131.98	161.02	2366800000	233	23	21	28	26	25	25	30	25	30	O43795;E9PDF6	Unconventional myosin-Ib	MYO1B	sp|O43795|MYO1B_HUMAN Unconventional myosin-Ib OS=Homo sapiens OX=9606 GN=MYO1B PE=1 SV=3;tr|E9PDF6|E9PDF6_HUMAN Unconventional myosin-Ib OS=Homo sapiens OX=9606 GN=MYO1B PE=1 SV=1	actin cytoskeleton organization;actin filament bundle assembly;actin filament organization;actin filament-based movement;actin filament-based process;cellular component assembly;cellular component assembly at cellular level;cellular component movement;cellular component organization;cellular component organization at cellular level;cellular component organization or biogenesis;cellular component …	actin binding;actin filament binding;adenyl nucleotide binding;adenyl ribonucleotide binding;ATP binding;binding;catalytic activity;cytoskeletal protein binding;hydrolase activity;hydrolase activity, acting on acid anhydrides;hydrolase activity, acting on acid anhydrides, in phosphorus-containing anhydrides;lipid binding;microfilament motor activity;motor activity;nucleoside-triphosphatase activi…
24.6223	25.5055	24.991	24.021	24.9462	24.6747	24.8918	25.0495	25.029		0.710894		0.735688		1.03488		0.260042	1	-0.492293	-1.31104	0.187665	0.290128	-0.442834	-1.58717	0.85886	0.925997	0.0494588	0.189594	40	40	40	378.03	122.47	352920000	139	10	12	16	10	12	11	20	21	27	O95613	Pericentrin	PCNT	sp|O95613|PCNT_HUMAN Pericentrin OS=Homo sapiens OX=9606 GN=PCNT PE=1 SV=4	anatomical structure development;anatomical structure formation involved in morphogenesis;anatomical structure morphogenesis;appendage morphogenesis;biological regulation;brain morphogenesis;cell cycle;cell cycle process;cell migration;cell motility;cell projection assembly;cell projection organization;cell proliferation;cellular component assembly;cellular component assembly at cellular level;ce…
25.8878	26.4404	26.1472	25.9608	26.0955	25.9038	26.0333	26.3798	26.1582		0.887774		0.868322		0.97809		0.368133	1	-0.171736	-1.01353	0.154394	0.252008	-0.203697	-1.75344	0.873967	0.93488	-0.0319608	-0.169043	40	40	40	338.26	196.62	818000000	184	18	17	24	19	17	18	22	22	27	Q12830;E7ETD6;E9PE19;A0A2R8Y7Q1;F5GXF5	Nucleosome-remodeling factor subunit BPTF	BPTF	sp|Q12830|BPTF_HUMAN Nucleosome-remodeling factor subunit BPTF OS=Homo sapiens OX=9606 GN=BPTF PE=1 SV=3;tr|E7ETD6|E7ETD6_HUMAN Nucleosome-remodeling factor subunit BPTF (Fragment) OS=Homo sapiens OX=9606 GN=BPTF PE=1 SV=3;tr|E9PE19|E9PE19_HUMAN Nucleosome	anatomical structure development;anterior/posterior pattern specification;biological regulation;biosynthetic process;brain development;cellular biosynthetic process;cellular component organization;cellular component organization at cellular level;cellular component organization or biogenesis;cellular component organization or biogenesis at cellular level;cellular macromolecule biosynthetic proces…	binding;cation binding;DNA binding;ion binding;metal ion binding;nucleic acid binding;protein binding;sequence-specific DNA binding;transcription factor binding;transition metal ion binding;zinc ion binding
30.0574	29.7596	30.0329	29.7633	29.86	29.972	28.8683	29.0922	28.9801		0.942891	+	1.84669	+	1.95854	GPR30_NES;GPR30-E2_NES	0.494125	1	-0.084837	-0.751546	0.000559247	0.00690058	0.884945	10.0127	0.00109224	0.0177846	0.969782	8.41396	40	40	40	100.2	247.19	8678600000	333	36	43	43	42	35	39	32	34	29	Q13200	26S proteasome non-ATPase regulatory subunit 2	PSMD2	sp|Q13200|PSMD2_HUMAN 26S proteasome non-ATPase regulatory subunit 2 OS=Homo sapiens OX=9606 GN=PSMD2 PE=1 SV=3	activation of immune response;activation of innate immune response;anaphase-promoting complex-dependent proteasomal ubiquitin-dependent protein catabolic process;antigen processing and presentation;antigen processing and presentation of exogenous antigen;antigen processing and presentation of exogenous peptide antigen;antigen processing and presentation of exogenous peptide antigen via MHC class …	enzyme regulator activity
27.0029	27.0116	26.96	27.245	26.956	27.1595	27.3804	27.153	27.3086		1.09329		0.894737		0.818391		0.213954	1	0.128674	1.47612	0.214472	0.325172	-0.160465	-1.47407	0.0137952	0.0575364	-0.289138	-4.19102	39	39	39	145.01	170.29	1788700000	194	15	16	19	24	19	24	26	23	28	A0A0A0MRM8;A0A1Y0BRN3;A0A590UJ40;E7EW20;Q9UM54;A0A590UK22;A0A590UKB0;A0A590UJ75;A0A0D9SGC1;A0A590UK86;A0A590UK71;A0A5F9ZI03;A0A590UJY4	Unconventional myosin-VI	MYO6	tr|A0A0A0MRM8|A0A0A0MRM8_HUMAN Unconventional myosin-6 OS=Homo sapiens OX=9606 GN=MYO6 PE=1 SV=1;tr|A0A1Y0BRN3|A0A1Y0BRN3_HUMAN Unconventional myosin-6 OS=Homo sapiens OX=9606 GN=MYO6 PE=1 SV=1;tr|A0A590UJ40|A0A590UJ40_HUMAN Unconventional myosin-6 OS=Homo	actin filament-based movement;actin filament-based process;anatomical structure development;anatomical structure morphogenesis;auditory receptor cell differentiation;behavior;biological regulation;cell communication;cell differentiation;cell projection organization;cell-cell signaling;cellular component assembly;cellular component assembly at cellular level;cellular component movement;cellular co…	actin binding;actin filament binding;adenyl nucleotide binding;adenyl ribonucleotide binding;ADP binding;ATP binding;binding;calmodulin binding;catalytic activity;cytoskeletal protein binding;hydrolase activity;hydrolase activity, acting on acid anhydrides;hydrolase activity, acting on acid anhydrides, in phosphorus-containing anhydrides;microfilament motor activity;minus-end directed microfilame…
26.4963	26.2286	26.2974	26.3655	25.6726	26.2447	26.4926	26.6649	26.7275		0.842926		0.69058		0.819266		0.340923	1	-0.246523	-1.07997	0.0764482	0.151334	-0.534119	-2.37447	0.0542756	0.14246	-0.287596	-2.69677	39	33	2	195.3	142.08	987480000	154	20	15	17	18	10	17	17	19	21	A0A0U1RQK7			tr|A0A0U1RQK7|A0A0U1RQK7_HUMAN Eukaryotic translation initiation factor 4 gamma 3 OS=Homo sapiens OX=9606 GN=EIF4G3 PE=1 SV=2
29.1359	29.061	29.7705	29.1941	29.2669	29.6346	29.3601	29.2999	29.5968		1.03004		0.963437		0.935336		0.878937	1	0.0427062	0.162302	0.759198	0.863259	-0.0537376	-0.328234	0.711276	0.838036	-0.0964438	-0.397532	39	39	38	91.19	323.31	7429700000	332	40	37	34	34	34	46	40	35	32	A0A3B3IU45;P33991;A0A3B3IT92;A0A3B3IS57;E5RG31;A0A3B3ITP6	DNA replication licensing factor MCM4	MCM4	tr|A0A3B3IU45|A0A3B3IU45_HUMAN DNA replication licensing factor MCM4 OS=Homo sapiens OX=9606 GN=MCM4 PE=1 SV=1;sp|P33991|MCM4_HUMAN DNA replication licensing factor MCM4 OS=Homo sapiens OX=9606 GN=MCM4 PE=1 SV=5;tr|A0A3B3IT92|A0A3B3IT92_HUMAN DNA replicati	biosynthetic process;cell cycle;cell cycle process;cellular biosynthetic process;cellular macromolecule biosynthetic process;cellular macromolecule metabolic process;cellular metabolic process;cellular nitrogen compound metabolic process;cellular process;DNA conformation change;DNA duplex unwinding;DNA geometric change;DNA metabolic process;DNA replication;DNA strand elongation;DNA strand elongat…	adenyl nucleotide binding;adenyl ribonucleotide binding;ATP binding;binding;catalytic activity;DNA binding;DNA helicase activity;helicase activity;hydrolase activity;hydrolase activity, acting on acid anhydrides;hydrolase activity, acting on acid anhydrides, in phosphorus-containing anhydrides;nucleic acid binding;nucleoside-triphosphatase activity;nucleotide binding;purine nucleotide binding;pur…
29.6088	29.4403	29.4875	29.3923	29.2031	29.4344	29.5105	29.4051	29.4573		0.889528		0.9238		1.03853		0.1244	1	-0.168888	-1.93984	0.213494	0.324488	-0.114347	-1.47794	0.405555	0.566259	0.0545413	0.928825	39	39	2	114.08	323.31	8092600000	290	33	27	29	33	33	26	36	37	36	C9J6P4		ZC3HAV1	tr|C9J6P4|C9J6P4_HUMAN Zinc finger CCCH-type antiviral protein 1 OS=Homo sapiens OX=9606 GN=ZC3HAV1 PE=1 SV=1		binding;catalytic activity;cation binding;ion binding;metal ion binding;NAD+ ADP-ribosyltransferase activity;transferase activity;transferase activity, transferring glycosyl groups;transferase activity, transferring pentosyl groups
27.3694	27.3268	27.2658	27.2521	27.2117	27.3476	27.1336	27.4758	27.3324		0.96581		0.970339		1.00469		0.374485	1	-0.0501881	-0.99864	0.705717	0.831301	-0.0434399	-0.405714	0.951217	0.977407	0.0067482	0.065101	39	39	25	263.25	304.95	1789300000	192	20	19	21	20	20	20	24	22	26	H0YM23;O75179	Ankyrin repeat domain-containing protein 17	ANKRD17	tr|H0YM23|H0YM23_HUMAN Ankyrin repeat domain-containing protein 17 (Fragment) OS=Homo sapiens OX=9606 GN=ANKRD17 PE=1 SV=1;sp|O75179|ANR17_HUMAN Ankyrin repeat domain-containing protein 17 OS=Homo sapiens OX=9606 GN=ANKRD17 PE=1 SV=3	anatomical structure maturation;biological regulation;blood vessel maturation;defense response;defense response to bacterium;developmental maturation;developmental process;immune response;immune system process;innate immune response;multi-organism process;negative regulation of biological process;negative regulation of cell differentiation;negative regulation of cellular process;negative regulati…	binding;chromatin binding;nucleic acid binding;RNA binding
29.6164	29.8876	29.868	29.8716	29.8878	29.6049	30.8802	30.9445	30.7971		0.998217	+	0.471138	+	0.47198	GPR30_NES;GPR30-E2_NES	0.984751	0.999215	-0.00257492	-0.0203333	0.00042685	0.00577143	-1.08578	-10.7347	0.00036891	0.00900935	-1.0832	-11.1447	39	39	26	112.89	323.31	16370000000	286	23	30	26	29	29	25	39	41	44	P05023	Sodium/potassium-transporting ATPase subunit alpha-1	ATP1A1	sp|P05023|AT1A1_HUMAN Sodium/potassium-transporting ATPase subunit alpha-1 OS=Homo sapiens OX=9606 GN=ATP1A1 PE=1 SV=1	biological regulation;cardiac muscle contraction;cation homeostasis;cation transport;cellular cation homeostasis;cellular chemical homeostasis;cellular homeostasis;cellular ion homeostasis;cellular metal ion homeostasis;cellular monovalent inorganic cation homeostasis;cellular potassium ion homeostasis;cellular potassium ion transport;cellular process;cellular response to abiotic stimulus;cellula…	active transmembrane transporter activity;adenyl nucleotide binding;adenyl ribonucleotide binding;ADP binding;alkali metal ion binding;ATP binding;ATPase activity;ATPase activity, coupled;ATPase activity, coupled to movement of substances;ATPase activity, coupled to transmembrane movement of ions;ATPase activity, coupled to transmembrane movement of ions, phosphorylative mechanism;ATPase activity…
30.3054	30.4314	29.9198	30.1035	30.4359	29.8771	30.7772	30.9158	30.5147		0.946028		0.661083		0.698799		0.738483	1	-0.0800457	-0.357932	0.040762	0.101633	-0.597097	-2.97943	0.0558338	0.14338	-0.517051	-2.66952	39	39	31	70.81	323.31	17320000000	336	33	34	38	37	28	38	43	41	44	P13797;A0A0A0MSQ0	Plastin-3	PLS3	sp|P13797|PLST_HUMAN Plastin-3 OS=Homo sapiens OX=9606 GN=PLS3 PE=1 SV=4;tr|A0A0A0MSQ0|A0A0A0MSQ0_HUMAN Plastin-3 OS=Homo sapiens OX=9606 GN=PLS3 PE=1 SV=1	anatomical structure development;bone development;developmental process	binding;calcium ion binding;cation binding;ion binding;metal ion binding
28.9003	29.3218	28.8839	29.0134	28.945	29.1236	29.323	29.7068	29.3984		0.99448		0.732685		0.736751		0.960741	1	-0.00798543	-0.0523758	0.0250304	0.0739873	-0.448736	-3.49406	0.0760741	0.177084	-0.44075	-2.37897	39	39	39	117.85	323.31	7357100000	349	42	29	32	40	35	32	50	45	44	P22314	Ubiquitin-like modifier-activating enzyme 1	UBA1	sp|P22314|UBA1_HUMAN Ubiquitin-like modifier-activating enzyme 1 OS=Homo sapiens OX=9606 GN=UBA1 PE=1 SV=3	catabolic process;cellular catabolic process;cellular macromolecule catabolic process;cellular macromolecule metabolic process;cellular metabolic process;cellular process;cellular protein metabolic process;cellular response to stimulus;cellular response to stress;macromolecule catabolic process;macromolecule metabolic process;macromolecule modification;metabolic process;modification-dependent mac…	acid-amino acid ligase activity;adenyl nucleotide binding;adenyl ribonucleotide binding;ATP binding;binding;catalytic activity;ligase activity;ligase activity, forming carbon-nitrogen bonds;nucleotide binding;purine nucleotide binding;purine ribonucleoside triphosphate binding;purine ribonucleotide binding;ribonucleotide binding;small conjugating protein ligase activity;small protein activating e…
27.7521	27.9069	27.6326	27.8676	27.6463	27.6034	28.5799	28.4972	28.3515		0.960524	+	0.586231	+	0.610324	GPR30_NES;GPR30-E2_NES	0.637159	1	-0.0581061	-0.509601	0.00187708	0.015122	-0.770459	-7.29514	0.0023547	0.0204052	-0.712353	-6.86749	39	39	39	119.16	319.2	3558100000	196	17	21	15	17	16	18	29	33	30	P52732;A0A7I2V3A9;A0A7I2YQY4;A0A7I2V3V3	Kinesin-like protein KIF11	KIF11	sp|P52732|KIF11_HUMAN Kinesin-like protein KIF11 OS=Homo sapiens OX=9606 GN=KIF11 PE=1 SV=2;tr|A0A7I2V3A9|A0A7I2V3A9_HUMAN Kinesin-like protein OS=Homo sapiens OX=9606 GN=KIF11 PE=1 SV=1;tr|A0A7I2YQY4|A0A7I2YQY4_HUMAN Kinesin-like protein OS=Homo sapiens O	antigen processing and presentation;antigen processing and presentation of exogenous antigen;antigen processing and presentation of exogenous peptide antigen;antigen processing and presentation of exogenous peptide antigen via MHC class II;antigen processing and presentation of peptide antigen;antigen processing and presentation of peptide antigen via MHC class II;antigen processing and presentat…	adenyl nucleotide binding;adenyl ribonucleotide binding;ATP binding;ATPase activity;binding;catalytic activity;enzyme binding;hydrolase activity;hydrolase activity, acting on acid anhydrides;hydrolase activity, acting on acid anhydrides, in phosphorus-containing anhydrides;kinase binding;microtubule motor activity;motor activity;nucleoside-triphosphatase activity;nucleotide binding;plus-end-direc…
29.0171	28.8524	28.7937	29.0408	28.8034	28.7608	29.1533	29.167	28.9003		0.986601		0.867377		0.879158		0.867944	1	-0.0194619	-0.177225	0.170229	0.271179	-0.205268	-1.67006	0.164946	0.297002	-0.185806	-1.69694	39	39	39	107.14	245.28	5849100000	297	35	34	29	30	30	26	42	35	36	P53618	Coatomer subunit beta	COPB1	sp|P53618|COPB_HUMAN Coatomer subunit beta OS=Homo sapiens OX=9606 GN=COPB1 PE=1 SV=3	cellular component organization;cellular component organization at cellular level;cellular component organization or biogenesis;cellular component organization or biogenesis at cellular level;cellular process;COPI coating of Golgi vesicle;establishment of localization;establishment of localization in cell;establishment of protein localization;Golgi transport vesicle coating;Golgi vesicle transpor…	structural molecule activity
28.7548	28.7275	28.6287	28.8565	28.8796	28.7278	28.6529	28.8454	28.8088		1.08494		1.03691		0.955728		0.125095	1	0.117619	1.935	0.527123	0.670703	0.05229	0.691797	0.405698	0.566284	-0.0653286	-0.928516	39	39	39	106.37	323.31	4968900000	256	27	31	26	25	25	25	30	30	37	P57740	Nuclear pore complex protein Nup107	NUP107	sp|P57740|NU107_HUMAN Nuclear pore complex protein Nup107 OS=Homo sapiens OX=9606 GN=NUP107 PE=1 SV=1	biological regulation;biosynthetic process;carbohydrate metabolic process;carbohydrate transport;cell cycle;cell cycle process;cell surface receptor linked signaling pathway;cellular biosynthetic process;cellular component assembly;cellular component assembly at cellular level;cellular component disassembly;cellular component disassembly at cellular level;cellular component organization;cellular …	nucleocytoplasmic transporter activity;structural constituent of nuclear pore;structural molecule activity;transporter activity
26.3324	26.4483	26.3686	25.719	26.9106	26.3696	26.9591	27.665	27.818		0.965896		0.451357		0.467294		0.892008	1	-0.0500609	-0.144616	0.0574272	0.127639	-1.14766	-2.64255	0.0146673	0.0603217	-1.0976	-4.1154	39	39	39	167.35	323.31	1562000000	143	14	13	10	7	10	11	19	29	30	Q08378	Golgin subfamily A member 3	GOLGA3	sp|Q08378|GOGA3_HUMAN Golgin subfamily A member 3 OS=Homo sapiens OX=9606 GN=GOLGA3 PE=1 SV=2	cellular process;establishment of localization;establishment of localization in cell;Golgi vesicle transport;intracellular transport;intra-Golgi vesicle-mediated transport;transport;vesicle-mediated transport	transporter activity
24.1326	24.3639	24.199	23.543	23.0034	23.8123	26.1512	26.1409	26.4677		0.582803	+	0.143551	+	0.246311	GPR30_NES;GPR30-E2_NES	0.0346266	1	-0.778919	-3.14661	0.000426866	0.0057305	-2.80037	-10.7346	9.22248e-05	0.002	-2.02145	-15.8662	39	39	39	227.58	156.2	519910000	105	8	11	7	5	4	6	18	23	23	Q15643;H0YJ97	Thyroid receptor-interacting protein 11	TRIP11	sp|Q15643|TRIPB_HUMAN Thyroid receptor-interacting protein 11 OS=Homo sapiens OX=9606 GN=TRIP11 PE=1 SV=3;tr|H0YJ97|H0YJ97_HUMAN Thyroid receptor-interacting protein 11 (Fragment) OS=Homo sapiens OX=9606 GN=TRIP11 PE=1 SV=1	anatomical structure development;biosynthetic process;cardiac septum development;cellular biosynthetic process;cellular component organization;cellular component organization at cellular level;cellular component organization or biogenesis;cellular component organization or biogenesis at cellular level;cellular macromolecule biosynthetic process;cellular macromolecule metabolic process;cellular me…	protein binding transcription factor activity;transcription coactivator activity;transcription cofactor activity;transcription factor binding transcription factor activity
29.486	29.5108	29.454	29.417	29.4511	29.502	29.7165	30.1065	30.1123		0.981515		0.696517		0.709635		0.415786	1	-0.0269171	-0.906828	0.0173297	0.0560813	-0.521769	-3.91438	0.0199738	0.0752311	-0.494851	-3.74846	39	39	39	151.66	322.61	9029600000	275	29	25	32	32	26	29	33	36	33	Q6P2E9	Enhancer of mRNA-decapping protein 4	EDC4	sp|Q6P2E9|EDC4_HUMAN Enhancer of mRNA-decapping protein 4 OS=Homo sapiens OX=9606 GN=EDC4 PE=1 SV=1	catabolic process;cellular catabolic process;cellular macromolecule catabolic process;cellular macromolecule metabolic process;cellular metabolic process;cellular nitrogen compound metabolic process;cellular process;exonucleolytic nuclear-transcribed mRNA catabolic process involved in deadenylation-dependent decay;gene expression;macromolecule catabolic process;macromolecule metabolic process;met…
25.8416	25.9824	26.4917	26.1174	26.1982	26.3884	26.4849	26.5692	26.7502		1.0939		0.775524		0.708953		0.576369	1	0.12948	0.607415	0.0307836	0.0861546	-0.366757	-3.27019	0.0797037	0.180467	-0.496237	-2.33626	39	39	39	192.95	188.69	1000700000	174	16	13	18	20	20	18	26	21	22	Q86U86;E7EVG2;H0Y5B5	Protein polybromo-1	PBRM1	sp|Q86U86|PB1_HUMAN Protein polybromo-1 OS=Homo sapiens OX=9606 GN=PBRM1 PE=1 SV=1;tr|E7EVG2|E7EVG2_HUMAN Protein polybromo-1 (Fragment) OS=Homo sapiens OX=9606 GN=PBRM1 PE=1 SV=8;tr|H0Y5B5|H0Y5B5_HUMAN Protein polybromo-1 (Fragment) OS=Homo sapiens OX=960	anatomical structure development;biological regulation;biosynthetic process;cell cycle phase;cell cycle process;cellular biosynthetic process;cellular component organization;cellular component organization at cellular level;cellular component organization or biogenesis;cellular component organization or biogenesis at cellular level;cellular macromolecule biosynthetic process;cellular macromolecul…	binding;chromatin binding;DNA binding;nucleic acid binding
27.2787	27.2731	26.9605	27.5936	27.2508	27.091	27.5414	27.3588	27.1505		1.10271		0.973722		0.883023		0.481055	1	0.141059	0.77604	0.846745	0.918014	-0.0384178	-0.206145	0.309415	0.46184	-0.179477	-1.16318	39	39	39	182.77	183.69	1877100000	181	22	20	18	20	20	13	18	26	24	Q8NI27;A0A0C4DG98	THO complex subunit 2	THOC2	sp|Q8NI27|THOC2_HUMAN THO complex subunit 2 OS=Homo sapiens OX=9606 GN=THOC2 PE=1 SV=2;tr|A0A0C4DG98|A0A0C4DG98_HUMAN THO complex subunit 2 OS=Homo sapiens OX=9606 GN=THOC2 PE=1 SV=1	cellular macromolecule metabolic process;cellular metabolic process;cellular nitrogen compound metabolic process;cellular process;establishment of localization;establishment of localization in cell;establishment of RNA localization;interaction with host;interspecies interaction between organisms;intracellular transport;intronless viral mRNA export from host nucleus;macromolecule metabolic process…	binding;nucleic acid binding;RNA binding
30.5854	30.4351	30.3649	30.4013	30.2915	30.281	30.3572	30.5688	30.3068		0.909276		0.941903		1.03588		0.143546	1	-0.13721	-1.81598	0.386934	0.519044	-0.0863489	-0.970092	0.648264	0.793524	0.0508614	0.492361	39	39	39	96.022	323.31	15850000000	325	37	34	30	35	33	38	37	41	40	Q8WUM4	Programmed cell death 6-interacting protein	PDCD6IP	sp|Q8WUM4|PDC6I_HUMAN Programmed cell death 6-interacting protein OS=Homo sapiens OX=9606 GN=PDCD6IP PE=1 SV=1	apoptosis;biological regulation;cell cycle;cell death;cellular process;cytokinetic cell separation;cytokinetic process;death;establishment of localization;establishment of protein localization;programmed cell death;protein transport;regulation of biological process;regulation of cell cycle;regulation of cell cycle process;regulation of cellular component organization;regulation of cellular proces…	binding;calcium-dependent protein binding;G-protein-coupled receptor binding;identical protein binding;protein binding;protein dimerization activity;protein homodimerization activity;proteinase activated receptor binding;receptor binding
27.5116	27.4433	27.2017	27.2969	27.5438	27.22	27.1021	27.115	26.9266		0.978089		1.23603		1.26372		0.825199	1	-0.0319621	-0.235758	0.0565309	0.126428	0.305715	2.65761	0.0392883	0.116895	0.337677	3.01676	39	39	39	112.42	122.68	1732300000	191	24	21	17	23	20	20	22	22	22	Q9Y4E8	Ubiquitin carboxyl-terminal hydrolase 15	USP15	sp|Q9Y4E8|UBP15_HUMAN Ubiquitin carboxyl-terminal hydrolase 15 OS=Homo sapiens OX=9606 GN=USP15 PE=1 SV=3	biological regulation;BMP signaling pathway;catabolic process;cell surface receptor linked signaling pathway;cellular catabolic process;cellular component organization;cellular component organization at cellular level;cellular component organization or biogenesis;cellular component organization or biogenesis at cellular level;cellular macromolecule catabolic process;cellular macromolecule metabol…	binding;catalytic activity;cysteine-type endopeptidase activity;cysteine-type peptidase activity;cytokine receptor binding;endopeptidase activity;hydrolase activity;identical protein binding;peptidase activity;peptidase activity, acting on L-amino acid peptides;protein binding;receptor binding;SMAD binding;small conjugating protein-specific protease activity;transforming growth factor beta recept…
31.9848	31.6908	31.784	31.916	31.6853	31.9476	31.8498	31.478	31.7093		1.02085		1.12551		1.10253		0.816055	1	0.0297642	0.248402	0.278987	0.395017	0.170581	1.25138	0.367749	0.523848	0.140817	1.01443	38	37	11	73.243	323.31	40959000000	407	41	44	51	42	43	48	43	46	49	O00571;A0A0D9SF53;A0A2R8YFS5;A0A0D9SG12;A0A2R8YF78;A0A0D9SFB3;A0A2R8Y4A4;A0A2U3TZJ9;A0A2R8YFR4;A0A2R8YCW1;A0A2R8Y5G6;A0A2R8Y645;F6S8Q4;A0A2R8Y7T2;A0A2R8YDH3;A0A2R8YDT5	ATP-dependent RNA helicase DDX3X	DDX3X	sp|O00571|DDX3X_HUMAN ATP-dependent RNA helicase DDX3X OS=Homo sapiens OX=9606 GN=DDX3X PE=1 SV=3;tr|A0A0D9SF53|A0A0D9SF53_HUMAN RNA helicase OS=Homo sapiens OX=9606 GN=DDX3X PE=1 SV=1;tr|A0A2R8YFS5|A0A2R8YFS5_HUMAN RNA helicase OS=Homo sapiens OX=9606 GN=	biological regulation;biosynthetic process;cellular biosynthetic process;cellular component assembly;cellular component assembly at cellular level;cellular component organization;cellular component organization at cellular level;cellular component organization or biogenesis;cellular component organization or biogenesis at cellular level;cellular macromolecular complex assembly;cellular macromolec…	adenyl nucleotide binding;adenyl ribonucleotide binding;ATP binding;ATPase activity;ATPase activity, coupled;ATP-dependent DNA helicase activity;ATP-dependent helicase activity;ATP-dependent RNA helicase activity;binding;catalytic activity;CTPase activity;DNA binding;DNA helicase activity;DNA-dependent ATPase activity;eukaryotic initiation factor 4E binding;GTPase activity;helicase activity;hydro…
26.1896	25.9261	26.5486	26.2407	26.036	26.6468	26.407	26.5741	26.7515		1.06173		0.829499		0.781271		0.751258	1	0.0864175	0.339574	0.259049	0.372596	-0.269688	-1.31428	0.158954	0.288939	-0.356105	-1.72854	38	38	35	238.1	199.18	1033600000	149	12	13	19	12	16	19	16	20	22	A6NIW2;Q5JSL3;A0A0J9YW64	Dedicator of cytokinesis protein 11	DOCK11	tr|A6NIW2|A6NIW2_HUMAN Dedicator of cytokinesis protein 11 OS=Homo sapiens OX=9606 GN=DOCK11 PE=1 SV=2;sp|Q5JSL3|DOC11_HUMAN Dedicator of cytokinesis protein 11 OS=Homo sapiens OX=9606 GN=DOCK11 PE=1 SV=2;tr|A0A0J9YW64|A0A0J9YW64_HUMAN Dedicator of cytokin	biological regulation;blood coagulation;cellular process;cellular response to stimulus;coagulation;hemostasis;intracellular signal transduction;multicellular organismal process;regulation of biological process;regulation of biological quality;regulation of body fluid levels;regulation of cellular process;response to stimulus;signal transduction;small GTPase mediated signal transduction	enzyme regulator activity;GTPase regulator activity;guanyl-nucleotide exchange factor activity;nucleoside-triphosphatase regulator activity;Ras guanyl-nucleotide exchange factor activity;Rho guanyl-nucleotide exchange factor activity;small GTPase regulator activity
27.1569	27.0162	27.2405	27.5733	27.3876	27.4839	27.6591	27.2628	27.7665		1.26904		0.945261		0.744865		0.0153222	1	0.343733	4.0621	0.643086	0.782509	-0.0812149	-0.500379	0.0632381	0.155454	-0.424948	-2.551	38	38	37	118.99	128.07	2107600000	196	21	16	24	26	18	21	23	20	27	F5H6E2;O00159	Unconventional myosin-Ic	MYO1C	tr|F5H6E2|F5H6E2_HUMAN Unconventional myosin-Ic OS=Homo sapiens OX=9606 GN=MYO1C PE=1 SV=1;sp|O00159|MYO1C_HUMAN Unconventional myosin-Ic OS=Homo sapiens OX=9606 GN=MYO1C PE=1 SV=4	biological regulation;cellular component organization;cellular component organization or biogenesis;defense response;establishment of localization;establishment of localization in cell;establishment of protein localization;establishment of RNA localization;immune response;immune system process;innate immune response;intracellular protein transport;intracellular transport;membrane organization;mRN…	actin-dependent ATPase activity;adenyl nucleotide binding;adenyl ribonucleotide binding;ATP binding;ATPase activity;ATPase activity, coupled;binding;catalytic activity;enzyme binding;GTPase binding;hydrolase activity;hydrolase activity, acting on acid anhydrides;hydrolase activity, acting on acid anhydrides, in phosphorus-containing anhydrides;motor activity;nucleoside-triphosphatase activity;nuc…
27.9931	27.6126	27.8431	27.9173	27.4509	27.9483	27.9858	27.8797	27.8366		0.969882		0.914759		0.943166		0.832314	1	-0.0441195	-0.225953	0.484113	0.625309	-0.128536	-0.770265	0.51791	0.67889	-0.0844167	-0.708196	38	38	38	148.53	211.38	2700700000	225	23	26	25	19	20	26	26	32	28	P19174	1-phosphatidylinositol 4,5-bisphosphate phosphodiesterase gamma-1	PLCG1	sp|P19174|PLCG1_HUMAN 1-phosphatidylinositol 4,5-bisphosphate phosphodiesterase gamma-1 OS=Homo sapiens OX=9606 GN=PLCG1 PE=1 SV=1	activation of immune response;activation of MAPKK activity;activation of phospholipase C activity;activation of protein kinase activity;antigen receptor-mediated signaling pathway;axon guidance;biological regulation;blood coagulation;calcium-mediated signaling;catabolic process;cell migration;cell motility;cell surface receptor linked signaling pathway;cellular catabolic process;cellular componen…	binding;calcium ion binding;catalytic activity;cation binding;cytokine receptor binding;enzyme binding;hydrolase activity;hydrolase activity, acting on ester bonds;ion binding;kinase binding;lipase activity;metal ion binding;molecular transducer activity;neurotrophin receptor binding;neurotrophin TRK receptor binding;neurotrophin TRKA receptor binding;phosphatidylinositol phospholipase C activity…
28.7779	28.6304	29.2032	28.7449	28.8401	29.1712	28.95	28.8067	29.2508		1.03399		0.943594		0.912575		0.833442	1	0.0482222	0.224401	0.672366	0.8076	-0.0837625	-0.455522	0.574011	0.732123	-0.131985	-0.611341	38	38	38	82.285	197.85	5705800000	273	27	24	36	25	28	32	29	38	34	P33992;B1AHB1	DNA replication licensing factor MCM5;DNA helicase	MCM5	sp|P33992|MCM5_HUMAN DNA replication licensing factor MCM5 OS=Homo sapiens OX=9606 GN=MCM5 PE=1 SV=5;tr|B1AHB1|B1AHB1_HUMAN DNA replication licensing factor MCM5 OS=Homo sapiens OX=9606 GN=MCM5 PE=1 SV=1	biosynthetic process;cell cycle;cell cycle process;cell division;cellular biosynthetic process;cellular macromolecule biosynthetic process;cellular macromolecule metabolic process;cellular metabolic process;cellular nitrogen compound metabolic process;cellular process;DNA metabolic process;DNA replication;DNA strand elongation;DNA strand elongation involved in DNA replication;DNA-dependent DNA re…	adenyl nucleotide binding;adenyl ribonucleotide binding;ATP binding;binding;catalytic activity;chromatin binding;DNA binding;DNA helicase activity;DNA replication origin binding;helicase activity;hydrolase activity;hydrolase activity, acting on acid anhydrides;hydrolase activity, acting on acid anhydrides, in phosphorus-containing anhydrides;nucleic acid binding;nucleoside-triphosphatase activity…
29.5237	29.8387	29.658	29.3224	29.6506	29.6491	29.284	29.5927	29.3443		0.912105		1.0971		1.20282		0.403675	1	-0.132728	-0.932919	0.406797	0.540845	0.133694	0.926131	0.112443	0.227309	0.266422	2.0282	38	38	38	81.307	323.31	8303800000	325	41	32	37	34	30	42	38	34	37	P33993	DNA replication licensing factor MCM7	MCM7	sp|P33993|MCM7_HUMAN DNA replication licensing factor MCM7 OS=Homo sapiens OX=9606 GN=MCM7 PE=1 SV=4	biological regulation;biosynthetic process;cell cycle;cell cycle process;cell proliferation;cellular biosynthetic process;cellular macromolecule biosynthetic process;cellular macromolecule metabolic process;cellular metabolic process;cellular nitrogen compound metabolic process;cellular process;cellular response to chemical stimulus;cellular response to endogenous stimulus;cellular response to ep…	adenyl nucleotide binding;adenyl ribonucleotide binding;ATP binding;binding;catalytic activity;DNA binding;DNA helicase activity;helicase activity;hydrolase activity;hydrolase activity, acting on acid anhydrides;hydrolase activity, acting on acid anhydrides, in phosphorus-containing anhydrides;nucleic acid binding;nucleoside-triphosphatase activity;nucleotide binding;purine nucleotide binding;pur…
28.1029	27.9392	28.2665	28.0871	28.3817	28.4119	27.9943	27.9585	28.4062		1.14133		1.12811		0.988418		0.245336	1	0.190715	1.36034	0.381725	0.511988	0.173908	0.98194	0.926834	0.961744	-0.0168063	-0.0977488	38	38	38	162.12	290.01	3588400000	222	25	24	20	28	24	20	29	27	25	Q12769;G3V198;E9PR16	Nuclear pore complex protein Nup160	NUP160	sp|Q12769|NU160_HUMAN Nuclear pore complex protein Nup160 OS=Homo sapiens OX=9606 GN=NUP160 PE=1 SV=3;tr|G3V198|G3V198_HUMAN Nuclear pore complex protein Nup160 (Fragment) OS=Homo sapiens OX=9606 GN=NUP160 PE=1 SV=2;tr|E9PR16|E9PR16_HUMAN Nuclear pore comp	biological regulation;biosynthetic process;carbohydrate metabolic process;carbohydrate transport;cell cycle;cell cycle process;cell surface receptor linked signaling pathway;cellular biosynthetic process;cellular component disassembly;cellular component disassembly at cellular level;cellular component organization;cellular component organization at cellular level;cellular component organization o…	nucleocytoplasmic transporter activity;transporter activity
26.1799	26.6542	26.213	25.9124	26.4217	26.5072	26.4485	26.9946	26.9069		0.953567		0.705671		0.740033		0.789632	1	-0.068594	-0.285223	0.115904	0.203633	-0.502932	-2.0016	0.129636	0.248893	-0.434338	-1.90402	38	32	32	158.17	151.27	1202300000	127	14	13	12	13	9	12	15	21	18	Q13464;A0A0U1RQV4	Rho-associated protein kinase 1	ROCK1	sp|Q13464|ROCK1_HUMAN Rho-associated protein kinase 1 OS=Homo sapiens OX=9606 GN=ROCK1 PE=1 SV=1;tr|A0A0U1RQV4|A0A0U1RQV4_HUMAN Non-specific serine/threonine protein kinase OS=Homo sapiens OX=9606 GN=ROCK1 PE=1 SV=1	actin cytoskeleton organization;actin filament-based process;actin-mediated cell contraction;apical constriction;apoptosis;axon guidance;biological adhesion;biological regulation;bleb assembly;cell adhesion;cell death;cell migration;cell motility;cell projection assembly;cell projection organization;cell surface receptor linked signaling pathway;cell-cell adhesion;cellular component assembly;cell…	adenyl nucleotide binding;adenyl ribonucleotide binding;ATP binding;binding;catalytic activity;cation binding;ion binding;kinase activity;metal ion binding;nucleotide binding;phosphotransferase activity, alcohol group as acceptor;protein kinase activity;protein serine/threonine kinase activity;purine nucleotide binding;purine ribonucleoside triphosphate binding;purine ribonucleotide binding;ribon…
30.7524	30.6434	30.4253	30.8028	30.5056	30.5148	30.7325	30.7443	30.6639		1.00048		0.929275		0.928825		0.996174	0.999444	0.000698725	0.00510109	0.352721	0.477952	-0.105822	-1.0506	0.344073	0.49993	-0.106521	-1.07204	38	38	38	97.169	323.31	18432000000	379	37	44	37	46	42	40	44	44	45	Q14974;J3KTM9	Importin subunit beta-1	KPNB1	sp|Q14974|IMB1_HUMAN Importin subunit beta-1 OS=Homo sapiens OX=9606 GN=KPNB1 PE=1 SV=2;tr|J3KTM9|J3KTM9_HUMAN Importin subunit beta-1 (Fragment) OS=Homo sapiens OX=9606 GN=KPNB1 PE=1 SV=1	apoptosis;biological regulation;catabolic process;cell death;cell surface receptor linked signaling pathway;cellular catabolic process;cellular component disassembly;cellular component disassembly at cellular level;cellular component disassembly involved in apoptosis;cellular component organization;cellular component organization at cellular level;cellular component organization or biogenesis;cel…	binding;cation binding;enzyme binding;ion binding;metal ion binding;nuclear localization sequence binding;peptide binding;protein binding;protein domain specific binding;protein transporter activity;signal sequence binding;substrate-specific transporter activity;transition metal ion binding;transporter activity;zinc ion binding
29.638	29.1335	28.5349	29.6935	29.4277	28.9726	28.2573	28.3284	28.1682		1.19954	+	2.16343		1.80355	GPR30-E2_NES	0.529805	1	0.262482	0.687063	0.00667246	0.0317852	1.11332	5.16554	0.0575232	0.14672	0.850841	2.64095	38	38	38	118.71	237.7	5639100000	268	35	29	26	41	28	34	29	24	22	Q8TEX9;H0YN14	Importin-4	IPO4	sp|Q8TEX9|IPO4_HUMAN Importin-4 OS=Homo sapiens OX=9606 GN=IPO4 PE=1 SV=2;tr|H0YN14|H0YN14_HUMAN Importin-4 OS=Homo sapiens OX=9606 GN=IPO4 PE=1 SV=1	cellular component assembly;cellular component assembly at cellular level;cellular component organization;cellular component organization at cellular level;cellular component organization or biogenesis;cellular component organization or biogenesis at cellular level;cellular macromolecular complex assembly;cellular macromolecular complex subunit organization;cellular process;chromatin assembly or …
28.7749	29.203	28.9824	28.6707	29.089	28.8255	28.5105	28.983	28.7748		0.916996		1.07598		1.17337		0.511614	1	-0.125013	-0.719525	0.595261	0.742385	0.105646	0.576342	0.278961	0.430823	0.230659	1.25146	38	38	35	96.864	323.31	5330600000	261	22	28	28	30	31	28	32	33	29	Q92598;A0A0A0MSM0	Heat shock protein 105 kDa	HSPH1	sp|Q92598|HS105_HUMAN Heat shock protein 105 kDa OS=Homo sapiens OX=9606 GN=HSPH1 PE=1 SV=1;tr|A0A0A0MSM0|A0A0A0MSM0_HUMAN Heat shock protein 105 kDa OS=Homo sapiens OX=9606 GN=HSPH1 PE=1 SV=1	biological regulation;cellular component organization;cellular component organization or biogenesis;cellular macromolecule metabolic process;cellular membrane organization;cellular metabolic process;cellular process;cellular protein metabolic process;cellular response to heat;cellular response to stimulus;cellular response to stress;chaperone mediated protein folding requiring cofactor;chaperone-…	adenyl nucleotide binding;adenyl ribonucleotide binding;ATP binding;binding;nucleotide binding;purine nucleotide binding;purine ribonucleoside triphosphate binding;purine ribonucleotide binding;ribonucleotide binding
28.7886	28.7541	28.5348	28.7846	28.7262	28.8027	28.615	28.8196	28.7592		1.05602		1.02801		0.973479		0.395794	1	0.0786336	0.950251	0.572634	0.719915	0.0398547	0.613638	0.717931	0.842739	-0.0387789	-0.387779	38	38	37	114.76	323.31	5086300000	273	27	29	33	31	28	28	31	32	34	Q9H2U1;E7EWK3	ATP-dependent RNA helicase DHX36	DHX36	sp|Q9H2U1|DHX36_HUMAN ATP-dependent DNA/RNA helicase DHX36 OS=Homo sapiens OX=9606 GN=DHX36 PE=1 SV=2;tr|E7EWK3|E7EWK3_HUMAN ATP-dependent DNA/RNA helicase DHX36 (Fragment) OS=Homo sapiens OX=9606 GN=DHX36 PE=1 SV=1	biological regulation;biosynthetic process;cellular biosynthetic process;cellular macromolecule biosynthetic process;cellular macromolecule metabolic process;cellular metabolic process;cellular nitrogen compound metabolic process;cellular process;defense response;immune response;immune system process;innate immune response;macromolecule biosynthetic process;macromolecule metabolic process;metabol…	adenyl nucleotide binding;adenyl ribonucleotide binding;ATP binding;ATPase activity;ATPase activity, coupled;ATP-dependent helicase activity;ATP-dependent RNA helicase activity;binding;catalytic activity;core promoter binding;DNA binding;DNA-dependent ATPase activity;double-stranded RNA binding;enzyme binding;G-quadruplex DNA binding;G-quadruplex RNA binding;helicase activity;histone deacetylase …
28.9734	28.8211	28.707	28.8606	29.1022	28.6332	27.692	27.5514	27.7407		1.02207	+	2.30375	+	2.254	GPR30_NES;GPR30-E2_NES	0.849696	1	0.0314992	0.202107	0.00120467	0.0135276	1.20399	8.20074	0.000255704	0.00602198	1.17249	12.2415	38	38	38	87.996	253.04	3659600000	212	33	26	21	33	22	25	20	15	17	Q9UGP8	Translocation protein SEC63 homolog	SEC63	sp|Q9UGP8|SEC63_HUMAN Translocation protein SEC63 homolog OS=Homo sapiens OX=9606 GN=SEC63 PE=1 SV=2	aging;anatomical structure development;biological regulation;cellular macromolecule metabolic process;cellular metabolic process;cellular process;cellular protein metabolic process;cellular response to chemical stimulus;cellular response to organic substance;cellular response to stimulus;cellular response to stress;cellular response to topologically incorrect protein;cellular response to unfolded…	protein transporter activity;receptor activity;substrate-specific transporter activity;transporter activity
28.6232	28.7807	28.4828	28.6816	28.673	28.4585	29.1683	29.223	29.2846		0.983139	+	0.650261	+	0.661413	GPR30_NES;GPR30-E2_NES	0.838494	1	-0.024533	-0.217457	0.00150858	0.0136849	-0.620909	-7.72952	0.00296358	0.0247863	-0.596376	-6.45609	37	37	37	138.68	314.82	5196300000	206	20	19	24	17	19	21	23	30	33	A0A087WUT6;O60841	Eukaryotic translation initiation factor 5B	EIF5B	tr|A0A087WUT6|A0A087WUT6_HUMAN Eukaryotic translation initiation factor 5B OS=Homo sapiens OX=9606 GN=EIF5B PE=1 SV=1;sp|O60841|IF2P_HUMAN Eukaryotic translation initiation factor 5B OS=Homo sapiens OX=9606 GN=EIF5B PE=1 SV=4	biological regulation;biosynthetic process;cellular biosynthetic process;cellular macromolecule biosynthetic process;cellular macromolecule metabolic process;cellular metabolic process;cellular process;cellular protein metabolic process;gene expression;macromolecule biosynthetic process;macromolecule metabolic process;metabolic process;posttranscriptional regulation of gene expression;primary met…	binding;catalytic activity;GTP binding;GTPase activity;guanyl nucleotide binding;guanyl ribonucleotide binding;hydrolase activity;hydrolase activity, acting on acid anhydrides;hydrolase activity, acting on acid anhydrides, in phosphorus-containing anhydrides;nucleic acid binding;nucleoside-triphosphatase activity;nucleotide binding;purine nucleotide binding;purine ribonucleoside triphosphate bind…
29.4297	29.3457	29.32	29.2895	29.1546	29.1837	29.6291	29.6865	29.29		0.897586		0.797787		0.888814		0.0416448	1	-0.155877	-2.95781	0.0667251	0.140534	-0.325924	-2.50058	0.255013	0.403571	-0.170046	-1.32758	37	37	37	106.81	323.31	8247600000	283	28	30	31	28	23	28	39	42	34	P49588;H3BPK7;A0A6Q8PGN5;A0A6Q8PFY2;A0A6Q8PF33;A0A6Q8PGE8;A0A6Q8PGR9;A0A6Q8PGB5;A0A6Q8PFK3;A0A6Q8PHJ2;A0A6Q8PH44;A0A6Q8PHP7	Alanine--tRNA ligase, cytoplasmic	AARS	sp|P49588|SYAC_HUMAN Alanine--tRNA ligase, cytoplasmic OS=Homo sapiens OX=9606 GN=AARS1 PE=1 SV=2;tr|H3BPK7|H3BPK7_HUMAN Alanine--tRNA ligase OS=Homo sapiens OX=9606 GN=AARS1 PE=1 SV=4;tr|A0A6Q8PGN5|A0A6Q8PGN5_HUMAN Alanine--tRNA ligase OS=Homo sapiens OX=	alanyl-tRNA aminoacylation;amine metabolic process;amino acid activation;anatomical structure development;biological regulation;carboxylic acid metabolic process;cellular amine metabolic process;cellular amino acid metabolic process;cellular ketone metabolic process;cellular macromolecule metabolic process;cellular metabolic process;cellular nitrogen compound metabolic process;cellular process;ce…	adenyl nucleotide binding;adenyl ribonucleotide binding;alanine-tRNA ligase activity;amine binding;amino acid binding;aminoacyl-tRNA editing activity;aminoacyl-tRNA ligase activity;ATP binding;binding;carboxylic acid binding;carboxylic ester hydrolase activity;catalytic activity;cation binding;hydrolase activity;hydrolase activity, acting on ester bonds;ion binding;ligase activity;ligase activity…
30.2252	30.0844	30.2564	30.3813	30.0919	30.3317	30.2779	30.3808	30.401		1.05678		0.942848		0.892186		0.485679	1	0.0796808	0.767316	0.431464	0.568875	-0.0849024	-0.873977	0.0651296	0.15821	-0.164583	-2.52327	37	37	37	77.86	323.31	13704000000	369	42	44	32	37	45	39	40	47	43	A0A7I2V430;A0A7I2V2M5;A0A7I2V4F0;Q92499;A0A7I2YQ77;A0A087WZ71;A0A087X2G1;A0A7I2V4J3	ATP-dependent RNA helicase DDX1	DDX1	tr|A0A7I2V430|A0A7I2V430_HUMAN ATP-dependent RNA helicase DDX1 OS=Homo sapiens OX=9606 GN=DDX1 PE=1 SV=1;tr|A0A7I2V2M5|A0A7I2V2M5_HUMAN ATP-dependent RNA helicase DDX1 OS=Homo sapiens OX=9606 GN=DDX1 PE=1 SV=1;tr|A0A7I2V4F0|A0A7I2V4F0_HUMAN ATP-dependent R	biological regulation;biosynthetic process;cellular biosynthetic process;cellular component assembly;cellular component assembly at cellular level;cellular component organization;cellular component organization at cellular level;cellular component organization or biogenesis;cellular component organization or biogenesis at cellular level;cellular macromolecular complex assembly;cellular macromolec…	adenyl nucleotide binding;adenyl ribonucleotide binding;ATP binding;ATPase activity;ATPase activity, coupled;ATP-dependent helicase activity;ATP-dependent RNA helicase activity;binding;catalytic activity;chromatin binding;DNA binding;DNA/RNA helicase activity;double-stranded RNA binding;exonuclease activity;helicase activity;hydrolase activity;hydrolase activity, acting on acid anhydrides;hydrola…
25.1984	25.1191	25.0166	25.1655	25.2119	25.1959	25.0329	25.2722	25.2567		1.05686		1.00266		0.948711		0.216081	1	0.0797869	1.46775	0.963459	0.980912	0.00382678	0.0487453	0.462274	0.624519	-0.0759602	-0.812147	37	37	37	338.09	79.924	400910000	135	15	12	12	12	14	17	15	18	20	A0A7P0TA78;A0A7P0TAC5;P42858;A0A7P0TAN5;A0A7P0Z417	Huntingtin	HTT	tr|A0A7P0TA78|A0A7P0TA78_HUMAN Huntingtin OS=Homo sapiens OX=9606 GN=HTT PE=1 SV=1;tr|A0A7P0TAC5|A0A7P0TAC5_HUMAN Huntingtin OS=Homo sapiens OX=9606 GN=HTT PE=1 SV=1;sp|P42858|HD_HUMAN Huntingtin OS=Homo sapiens OX=9606 GN=HTT PE=1 SV=2;tr|A0A7P0TAN5|A0A7P	acidic amino acid transport;aging;amide biosynthetic process;amine metabolic process;amine transport;amino acid import;amino acid transport;anatomical structure development;anatomical structure formation involved in morphogenesis;anion transport;anterior/posterior pattern specification;apoptosis;associative learning;axon cargo transport;behavior;behavioral interaction between organisms;biological…	beta-tubulin binding;binding;cytoskeletal protein binding;diazepam binding;drug binding;dynactin binding;dynein binding;dynein intermediate chain binding;identical protein binding;ion channel binding;p53 binding;profilin binding;protein binding;transcription factor binding;tubulin binding
29.8595	29.6295	29.9721	29.7733	29.8152	29.9167	29.9746	29.8026	29.951		1.01023		0.949777		0.94016		0.899764	1	0.0146815	0.134149	0.339645	0.464794	-0.0743395	-1.08321	0.479559	0.643051	-0.089021	-0.778874	37	37	37	99.966	306.91	10853000000	267	26	27	26	30	32	30	27	38	31	A8MXP9;P43243;A0A0R4J2E8;D6REM6;D6R991	Matrin-3	MATR3	tr|A8MXP9|A8MXP9_HUMAN Matrin-3 OS=Homo sapiens OX=9606 GN=MATR3 PE=1 SV=1;sp|P43243|MATR3_HUMAN Matrin-3 OS=Homo sapiens OX=9606 GN=MATR3 PE=1 SV=2;tr|A0A0R4J2E8|A0A0R4J2E8_HUMAN Matrin-3 OS=Homo sapiens OX=9606 GN=MATR3 PE=1 SV=1;tr|D6REM6|D6REM6_HUMAN M	biological regulation;posttranscriptional regulation of gene expression;regulation of biological process;regulation of gene expression;regulation of macromolecule metabolic process;regulation of metabolic process	binding;cation binding;ion binding;metal ion binding;nucleic acid binding;nucleotide binding;structural molecule activity;transition metal ion binding;zinc ion binding
28.4464	27.7818	27.7029	28.1909	27.9026	27.8338	28.1569	28.1549	27.9763		0.99914		0.920026		0.920818		0.996419	0.999084	-0.00124105	-0.00477428	0.389529	0.521572	-0.120254	-0.96424	0.650314	0.795076	-0.119013	-0.489198	37	37	28	102.33	173.91	3284700000	231	28	24	23	22	21	24	28	30	31	D3DQV9;P78344;H0Y3P2	Eukaryotic translation initiation factor 4 gamma 2	EIF4G2	tr|D3DQV9|D3DQV9_HUMAN Eukaryotic translation initiation factor 4 gamma 2 (Fragment) OS=Homo sapiens OX=9606 GN=EIF4G2 PE=1 SV=1;sp|P78344|IF4G2_HUMAN Eukaryotic translation initiation factor 4 gamma 2 OS=Homo sapiens OX=9606 GN=EIF4G2 PE=1 SV=1;tr|H0Y3P2|	biological regulation;cell cycle arrest;cell cycle process;cell death;cell surface receptor linked signaling pathway;cellular process;cellular response to chemical stimulus;cellular response to cytokine stimulus;cellular response to organic substance;cellular response to stimulus;cytokine-mediated signaling pathway;death;negative regulation of biological process;negative regulation of cell cycle;…	binding;nucleic acid binding;RNA binding;translation factor activity, nucleic acid binding;translation initiation factor activity
29.9439	30.0846	30.088	29.7692	30.0549	30.0762	30.049	30.0525	30.1641		0.951266		0.919084		0.966169		0.547326	1	-0.0720793	-0.656543	0.314669	0.43704	-0.121731	-1.14878	0.459281	0.622191	-0.0496521	-0.818006	37	37	37	99.719	164.33	11800000000	286	30	28	28	32	32	34	31	36	35	V9GYY3;F5H2F4;P11586;V9GZ78;A0A494C1T2	C-1-tetrahydrofolate synthase, cytoplasmic;Methylenetetrahydrofolate dehydrogenase;Methenyltetrahydrofolate cyclohydrolase;Formyltetrahydrofolate synthetase;C-1-tetrahydrofolate synthase, cytoplasmic, N-terminally processed	MTHFD1	tr|V9GYY3|V9GYY3_HUMAN C-1-tetrahydrofolate synthase, cytoplasmic OS=Homo sapiens OX=9606 GN=MTHFD1 PE=1 SV=2;tr|F5H2F4|F5H2F4_HUMAN C-1-tetrahydrofolate synthase, cytoplasmic OS=Homo sapiens OX=9606 GN=MTHFD1 PE=1 SV=2;sp|P11586|C1TC_HUMAN C-1-tetrahydrof	10-formyltetrahydrofolate biosynthetic process;10-formyltetrahydrofolate metabolic process;amine biosynthetic process;amine metabolic process;anatomical structure development;anatomical structure formation involved in morphogenesis;aromatic compound biosynthetic process;aspartate family amino acid biosynthetic process;aspartate family amino acid metabolic process;biosynthetic process;carboxylic a…	adenyl nucleotide binding;adenyl ribonucleotide binding;ATP binding;binding;catalytic activity;cyclohydrolase activity;formate-tetrahydrofolate ligase activity;hydrolase activity;hydrolase activity, acting on carbon-nitrogen (but not peptide) bonds;hydrolase activity, acting on carbon-nitrogen (but not peptide) bonds, in cyclic amidines;ligase activity;ligase activity, forming carbon-nitrogen bon…
31.2393	31.1878	31.4701	31.4778	31.5577	31.4289	31.2164	30.7987	31.1815		1.14001		1.34036		1.17574		0.116279	1	0.189041	1.99877	0.038364	0.0987504	0.422616	3.04102	0.216912	0.361056	0.233575	1.4645	37	28	28	69.086	222.18	28679000000	301	30	32	38	33	30	37	36	30	35	J3KTA4;P17844;A0A0G2JLI4;A0A7I2V507;A0A7I2V2S0;A0A7I2V5F5	Probable ATP-dependent RNA helicase DDX5	DDX5	tr|J3KTA4|J3KTA4_HUMAN DEAD box protein 5 OS=Homo sapiens OX=9606 GN=DDX5 PE=1 SV=1;sp|P17844|DDX5_HUMAN Probable ATP-dependent RNA helicase DDX5 OS=Homo sapiens OX=9606 GN=DDX5 PE=1 SV=1;tr|A0A0G2JLI4|A0A0G2JLI4_HUMAN DEAD box protein 5 OS=Homo sapiens OX	biological regulation;biosynthetic process;cell growth;cellular biosynthetic process;cellular macromolecule biosynthetic process;cellular macromolecule metabolic process;cellular metabolic process;cellular nitrogen compound metabolic process;cellular process;cellular response to stimulus;chordate embryonic development;circadian rhythm;developmental process;embryo development;embryo development en…	adenyl nucleotide binding;adenyl ribonucleotide binding;androgen receptor binding;ATP binding;ATPase activity;ATPase activity, coupled;ATP-dependent helicase activity;ATP-dependent RNA helicase activity;binding;catalytic activity;estrogen receptor binding;helicase activity;hormone receptor binding;hydrolase activity;hydrolase activity, acting on acid anhydrides;hydrolase activity, acting on acid …
27.1573	27.2589	27.3719	27.3252	27.2353	27.4243	27.3644	27.1214	27.5461		1.04649		0.989184		0.945238		0.471705	1	0.0655619	0.793875	0.91281	0.958093	-0.0156892	-0.116582	0.587008	0.742082	-0.0812511	-0.589836	37	37	31	196.69	197.76	1928900000	176	17	15	20	20	14	21	21	25	23	O14646	Chromodomain-helicase-DNA-binding protein 1	CHD1	sp|O14646|CHD1_HUMAN Chromodomain-helicase-DNA-binding protein 1 OS=Homo sapiens OX=9606 GN=CHD1 PE=1 SV=2	biological regulation;biosynthetic process;cellular biosynthetic process;cellular component organization;cellular component organization at cellular level;cellular component organization or biogenesis;cellular component organization or biogenesis at cellular level;cellular macromolecule biosynthetic process;cellular macromolecule metabolic process;cellular metabolic process;cellular nitrogen comp…	adenyl nucleotide binding;adenyl ribonucleotide binding;ATP binding;ATPase activity;ATPase activity, coupled;ATP-dependent DNA helicase activity;ATP-dependent helicase activity;binding;catalytic activity;DNA binding;DNA helicase activity;DNA-dependent ATPase activity;helicase activity;histone binding;hydrolase activity;hydrolase activity, acting on acid anhydrides;hydrolase activity, acting on ac…
29.8514	29.8476	29.9636	29.9389	30.0388	30.1347	30.3247	30.1736	30.401		1.1095		0.833745	+	0.751458	GPR30_NES	0.0926524	1	0.149913	2.2	0.0400692	0.100153	-0.262323	-2.99677	0.00584711	0.033299	-0.412235	-5.3598	37	37	36	90.932	209.89	13234000000	353	35	34	39	40	35	39	46	42	43	O43143	Pre-mRNA-splicing factor ATP-dependent RNA helicase DHX15	DHX15	sp|O43143|DHX15_HUMAN Pre-mRNA-splicing factor ATP-dependent RNA helicase DHX15 OS=Homo sapiens OX=9606 GN=DHX15 PE=1 SV=2	cellular macromolecule metabolic process;cellular metabolic process;cellular nitrogen compound metabolic process;cellular process;macromolecule metabolic process;metabolic process;mRNA metabolic process;mRNA processing;nitrogen compound metabolic process;nuclear mRNA splicing, via spliceosome;nucleic acid metabolic process;nucleobase-containing compound metabolic process;primary metabolic process…	adenyl nucleotide binding;adenyl ribonucleotide binding;ATP binding;ATPase activity;ATPase activity, coupled;ATP-dependent helicase activity;ATP-dependent RNA helicase activity;binding;catalytic activity;double-stranded RNA binding;helicase activity;hydrolase activity;hydrolase activity, acting on acid anhydrides;hydrolase activity, acting on acid anhydrides, in phosphorus-containing anhydrides;n…
28.7096	28.5017	28.7878	28.7646	28.7424	28.6106	29.0731	29.0273	29.0064		1.02774	+	0.795676		0.774197	GPR30-E2_NES	0.707614	1	0.0394802	0.402918	0.00315115	0.0221687	-0.329746	-6.34996	0.0135512	0.0576128	-0.369226	-4.21321	37	35	34	94.33	323.31	5547000000	267	26	28	28	28	24	27	31	41	34	P34932;A0A087WYC1	Heat shock 70 kDa protein 4	HSPA4	sp|P34932|HSP74_HUMAN Heat shock 70 kDa protein 4 OS=Homo sapiens OX=9606 GN=HSPA4 PE=1 SV=4;tr|A0A087WYC1|A0A087WYC1_HUMAN Heat shock 70 kDa protein 4 OS=Homo sapiens OX=9606 GN=HSPA4 PE=1 SV=1	cellular component assembly;cellular component assembly at cellular level;cellular component organization;cellular component organization at cellular level;cellular component organization or biogenesis;cellular component organization or biogenesis at cellular level;cellular macromolecular complex assembly;cellular macromolecular complex subunit organization;cellular membrane organization;cellular…	adenyl nucleotide binding;adenyl ribonucleotide binding;ATP binding;binding;nucleotide binding;purine nucleotide binding;purine ribonucleoside triphosphate binding;purine ribonucleotide binding;ribonucleotide binding
25.8633	26.2873	25.9957	26.1418	26.205	26.1067	25.7782	26.0926	25.7768		1.07354		1.20467		1.12214		0.47019	1	0.102376	0.796792	0.069174	0.141244	0.268634	2.46694	0.366552	0.52293	0.166257	1.01727	37	37	37	250.75	111.68	708930000	124	12	15	11	10	14	12	14	22	14	P50748;E7ES84	Kinetochore-associated protein 1	KNTC1	sp|P50748|KNTC1_HUMAN Kinetochore-associated protein 1 OS=Homo sapiens OX=9606 GN=KNTC1 PE=1 SV=1;tr|E7ES84|E7ES84_HUMAN Kinetochore-associated protein 1 OS=Homo sapiens OX=9606 GN=KNTC1 PE=1 SV=1	biological regulation;cell cycle;cell cycle checkpoint;cell cycle phase;cell cycle process;cell division;cellular component assembly;cellular component organization;cellular component organization at cellular level;cellular component organization or biogenesis;cellular component organization or biogenesis at cellular level;cellular process;cellular response to stimulus;intracellular signal transd…
30.0166	29.9887	29.7792	29.9845	29.9947	29.8142	30.358	30.2367	30.3726		1.00204	+	0.762429	+	0.760877	GPR30_NES;GPR30-E2_NES	0.976812	1	0.0029405	0.0309239	0.00575538	0.0277758	-0.391324	-5.38344	0.0103252	0.0498321	-0.394265	-4.56174	37	37	37	92.48	310.86	13375000000	288	31	30	33	27	33	28	34	37	35	P55884	Eukaryotic translation initiation factor 3 subunit B	EIF3B	sp|P55884|EIF3B_HUMAN Eukaryotic translation initiation factor 3 subunit B OS=Homo sapiens OX=9606 GN=EIF3B PE=1 SV=3	biological regulation;biosynthetic process;cellular biosynthetic process;cellular component assembly;cellular component assembly at cellular level;cellular component organization;cellular component organization at cellular level;cellular component organization or biogenesis;cellular component organization or biogenesis at cellular level;cellular macromolecular complex assembly;cellular macromolec…	binding;nucleic acid binding;nucleotide binding;protein binding;protein complex scaffold;RNA binding;structural molecule activity;translation factor activity, nucleic acid binding;translation initiation factor activity
26.0409	26.5189	27.2494	26.0182	26.2154	26.9407	26.8488	27.2775	27.9196		0.86356		0.515055		0.596432		0.662372	1	-0.211632	-0.470705	0.084313	0.163858	-0.957202	-2.28508	0.187381	0.323903	-0.74557	-1.58845	37	37	34	135.78	323.31	1563900000	165	10	14	21	8	12	20	22	27	31	Q13136;A0A2R8Y7R9	Liprin-alpha-1	PPFIA1	sp|Q13136|LIPA1_HUMAN Liprin-alpha-1 OS=Homo sapiens OX=9606 GN=PPFIA1 PE=1 SV=1;tr|A0A2R8Y7R9|A0A2R8Y7R9_HUMAN Liprin-alpha-1 (Fragment) OS=Homo sapiens OX=9606 GN=PPFIA1 PE=1 SV=1	biological adhesion;biological regulation;cell adhesion;cell communication;cell-cell signaling;cell-matrix adhesion;cell-substrate adhesion;cellular process;cellular response to stimulus;establishment of localization;establishment of localization in cell;glutamate secretion;negative regulation of actin filament bundle assembly;negative regulation of biological process;negative regulation of cellu…	molecular transducer activity;signal transducer activity
27.2769	27.5459	27.2365	27.0865	27.3957	27.0749	27.5437	28.1153	27.749		0.890421		0.652033		0.732275		0.306757	1	-0.16744	-1.17056	0.0353572	0.0943287	-0.616983	-3.12495	0.0806662	0.181857	-0.449542	-2.3253	37	37	22	145.18	133.4	2281100000	187	22	20	22	19	12	20	25	24	23	Q7L576;A0A0G2JR96;A0A0G2JQT1	Cytoplasmic FMR1-interacting protein 1	CYFIP1	sp|Q7L576|CYFP1_HUMAN Cytoplasmic FMR1-interacting protein 1 OS=Homo sapiens OX=9606 GN=CYFIP1 PE=1 SV=1;tr|A0A0G2JR96|A0A0G2JR96_HUMAN Cytoplasmic FMR1-interacting protein 1 (Fragment) OS=Homo sapiens OX=9606 GN=CYFIP1 PE=1 SV=4;tr|A0A0G2JQT1|A0A0G2JQT1_H	axon extension;biological regulation;cell growth;cell projection assembly;cell projection organization;cell surface receptor linked signaling pathway;cellular component assembly;cellular component assembly at cellular level;cellular component organization;cellular component organization at cellular level;cellular component organization or biogenesis;cellular component organization or biogenesis a…	actin binding;actin filament binding;binding;cytoskeletal protein binding;enzyme binding;GTPase binding;protein binding;protein complex binding;Rac GTPase binding;Ras GTPase binding;Rho GTPase binding;small GTPase binding
26.2928	25.9419	26.3325	25.9312	24.9475	26.0541	25.7389	25.6217	26.1263		0.685474		0.879825		1.28353		0.216414	1	-0.544827	-1.46645	0.653947	0.79219	-0.184711	-0.483606	0.140958	0.263982	0.360116	1.83164	37	23	0	269.45	115.06	708000000	91	13	12	11	8	7	9	10	9	12	Q8IWZ3	Ankyrin repeat and KH domain-containing protein 1	ANKHD1	sp|Q8IWZ3|ANKH1_HUMAN Ankyrin repeat and KH domain-containing protein 1 OS=Homo sapiens OX=9606 GN=ANKHD1 PE=1 SV=1
25.8703	26.0588	26.1514	26.2391	26.1928	26.3503	26.3328	26.3092	26.2938		1.17598		0.965114		0.820691		0.0695371	1	0.233861	2.46206	0.346694	0.471977	-0.0512282	-1.0655	0.0268902	0.0931417	-0.285089	-3.41554	37	37	37	189.03	131.03	917120000	150	13	13	17	18	12	15	22	20	20	Q9UK61;A0A087X0F1	Protein FAM208A	FAM208A	sp|Q9UK61|TASOR_HUMAN Protein TASOR OS=Homo sapiens OX=9606 GN=TASOR PE=1 SV=3;tr|A0A087X0F1|A0A087X0F1_HUMAN Protein TASOR OS=Homo sapiens OX=9606 GN=TASOR PE=1 SV=1
26.6982	26.8717	26.7962	26.3837	26.8299	26.9529	27.0536	27.1759	27.2952		0.954917		0.730659		0.765154		0.730451	1	-0.0665531	-0.369549	0.0721455	0.14539	-0.452731	-2.42789	0.0108806	0.0509672	-0.386178	-4.49301	36	36	35	155.23	181.82	1529400000	184	17	11	18	19	14	20	31	25	29	Q7Z478;A0A087WYN9	ATP-dependent RNA helicase DHX29	DHX29	sp|Q7Z478|DHX29_HUMAN ATP-dependent RNA helicase DHX29 OS=Homo sapiens OX=9606 GN=DHX29 PE=1 SV=2;tr|A0A087WYN9|A0A087WYN9_HUMAN ATP-dependent RNA helicase DHX29 OS=Homo sapiens OX=9606 GN=DHX29 PE=1 SV=1	cellular macromolecule metabolic process;cellular metabolic process;cellular nitrogen compound metabolic process;cellular process;macromolecule metabolic process;metabolic process;nitrogen compound metabolic process;nucleic acid metabolic process;nucleobase-containing compound metabolic process;primary metabolic process;RNA metabolic process;RNA processing	adenyl nucleotide binding;adenyl ribonucleotide binding;ATP binding;ATPase activity;ATPase activity, coupled;ATP-dependent helicase activity;ATP-dependent RNA helicase activity;binding;catalytic activity;helicase activity;hydrolase activity;hydrolase activity, acting on acid anhydrides;hydrolase activity, acting on acid anhydrides, in phosphorus-containing anhydrides;nucleic acid binding;nucleosi…
25.8642	25.6705	26.2482	24.5155	25.6631	26.0884	26.3888	26.6815	26.8045		0.704522		0.43449		0.616717		0.368934	1	-0.505284	-1.01164	0.0684847	0.140368	-1.2026	-2.47627	0.0292745	0.0976371	-0.69732	-3.3238	36	36	32	193.63	223.8	949260000	144	12	9	14	7	12	18	21	28	23	A0A0A0MRJ0;A0A0A0MRJ1;Q5VT25;H0Y5V1	Non-specific serine/threonine protein kinase;Serine/threonine-protein kinase MRCK alpha	CDC42BPA	tr|A0A0A0MRJ0|A0A0A0MRJ0_HUMAN Non-specific serine/threonine protein kinase OS=Homo sapiens OX=9606 GN=CDC42BPA PE=1 SV=1;tr|A0A0A0MRJ1|A0A0A0MRJ1_HUMAN Non-specific serine/threonine protein kinase OS=Homo sapiens OX=9606 GN=CDC42BPA PE=1 SV=2;sp|Q5VT25|MR	actin cytoskeleton organization;actin cytoskeleton reorganization;actin filament-based process;actomyosin structure organization;biological regulation;cell migration;cell motility;cellular component movement;cellular component organization;cellular component organization at cellular level;cellular component organization or biogenesis;cellular component organization or biogenesis at cellular level…	adenyl nucleotide binding;adenyl ribonucleotide binding;ATP binding;binding;catalytic activity;cation binding;identical protein binding;ion binding;kinase activity;magnesium ion binding;metal ion binding;nucleotide binding;phosphotransferase activity, alcohol group as acceptor;protein binding;protein kinase activity;protein serine/threonine kinase activity;purine nucleotide binding;purine ribonuc…
27.3068	27.2956	27.6432	26.9895	26.9871	27.3185	27.2071	27.2366	27.3719		0.802809		0.886662		1.10445		0.116224	1	-0.316871	-1.99919	0.225413	0.335524	-0.173544	-1.43199	0.314834	0.469237	0.143327	1.14833	36	36	36	227.73	319.65	1792200000	194	21	18	24	17	17	25	23	21	28	A0A5H1ZRS1;Q15154;A0A4W8VX11	Pericentriolar material 1 protein	PCM1	tr|A0A5H1ZRS1|A0A5H1ZRS1_HUMAN Pericentriolar material 1 protein OS=Homo sapiens OX=9606 GN=PCM1 PE=1 SV=1;sp|Q15154|PCM1_HUMAN Pericentriolar material 1 protein OS=Homo sapiens OX=9606 GN=PCM1 PE=1 SV=5;tr|A0A4W8VX11|A0A4W8VX11_HUMAN Pericentriolar materi	anatomical structure formation involved in morphogenesis;biological regulation;cell cycle;cell cycle process;cell projection assembly;cell projection organization;cellular component assembly;cellular component assembly at cellular level;cellular component assembly involved in morphogenesis;cellular component movement;cellular component organization;cellular component organization at cellular leve…	binding;identical protein binding;protein binding
27.433	27.4987	27.2808	27.6333	27.4305	27.3273	27.6758	27.7972	27.3314		1.04214		0.90893		0.872174		0.618969	1	0.0595519	0.538234	0.453154	0.592773	-0.13776	-0.830096	0.268567	0.419425	-0.197311	-1.28369	36	36	27	103.98	201.16	2158200000	182	17	18	21	21	17	21	23	22	22	Q13620;K4DI93;A0A669KAX4;A0A7P0TAQ3;A0A7P0T954;A0A7P0T9L3;A0A7P0T8P8;A0A804CL36;A0A7P0T9C8;A0A7P0T9D0;A0A669KBG9;A0A7P0T9P5;A0A7P0TAF9	Cullin-4B	CUL4B	sp|Q13620|CUL4B_HUMAN Cullin-4B OS=Homo sapiens OX=9606 GN=CUL4B PE=1 SV=4;tr|K4DI93|K4DI93_HUMAN Cullin 4B, isoform CRA_e OS=Homo sapiens OX=9606 GN=CUL4B PE=1 SV=1;tr|A0A669KAX4|A0A669KAX4_HUMAN Cullin-4B OS=Homo sapiens OX=9606 GN=CUL4B PE=1 SV=1;tr|A0A	biological regulation;biosynthetic process;catabolic process;cell cycle;cellular biosynthetic process;cellular catabolic process;cellular component organization;cellular component organization at cellular level;cellular component organization or biogenesis;cellular component organization or biogenesis at cellular level;cellular macromolecule biosynthetic process;cellular macromolecule catabolic p…
27.6	27.3491	27.3382	27.3829	26.9191	27.241	27.7189	27.5695	27.6728		0.842037		0.720606		0.855789		0.199757	1	-0.248045	-1.53424	0.0305194	0.0856219	-0.472717	-3.27935	0.079864	0.18064	-0.224672	-2.33443	36	36	36	139.09	275.53	2159700000	219	22	22	29	21	12	22	32	26	33	E7EX90;A0A7P0Z4C3;A0A804CDA6;Q14203;Q6AWB1	Dynactin subunit 1	DCTN1;DKFZp686E0752	tr|E7EX90|E7EX90_HUMAN Dynactin subunit 1 OS=Homo sapiens OX=9606 GN=DCTN1 PE=1 SV=1;tr|A0A7P0Z4C3|A0A7P0Z4C3_HUMAN Dynactin subunit 1 OS=Homo sapiens OX=9606 GN=DCTN1 PE=1 SV=1;tr|A0A804CDA6|A0A804CDA6_HUMAN Dynactin subunit 1 OS=Homo sapiens OX=9606 GN=D	anatomical structure development;antigen processing and presentation;antigen processing and presentation of exogenous antigen;antigen processing and presentation of exogenous peptide antigen;antigen processing and presentation of exogenous peptide antigen via MHC class II;antigen processing and presentation of peptide antigen;antigen processing and presentation of peptide antigen via MHC class II…	catalytic activity;hydrolase activity;hydrolase activity, acting on acid anhydrides;hydrolase activity, acting on acid anhydrides, in phosphorus-containing anhydrides;motor activity;nucleoside-triphosphatase activity;pyrophosphatase activity
28.2979	28.7036	28.3312	28.078	28.2635	28.3265	28.7011	29.2543	29.0404		0.857638	+	0.584008		0.680949	GPR30-E2_NES	0.213485	1	-0.22156	-1.47797	0.0119532	0.0447929	-0.775941	-4.37159	0.0553269	0.142749	-0.554381	-2.67829	36	36	36	245.37	220.33	4691500000	208	18	24	26	17	16	20	22	37	28	A0A804HKE7;E7EVA0;P27816	Microtubule-associated protein;Microtubule-associated protein 4	MAP4	tr|A0A804HKE7|A0A804HKE7_HUMAN Microtubule-associated protein 4 OS=Homo sapiens OX=9606 GN=MAP4 PE=4 SV=1;tr|E7EVA0|E7EVA0_HUMAN Microtubule-associated protein OS=Homo sapiens OX=9606 GN=MAP4 PE=1 SV=1;sp|P27816|MAP4_HUMAN Microtubule-associated protein 4	cell cycle process;cell division;cellular component movement;cellular component organization;cellular component organization at cellular level;cellular component organization or biogenesis;cellular component organization or biogenesis at cellular level;cellular process;cytoskeleton organization;establishment of localization;establishment of localization in cell;establishment of organelle localiza…	structural molecule activity
29.4759	29.7677	29.4983	29.3574	29.4735	29.3623	30.1312	30.3359	30.1164		0.880943	+	0.57563	+	0.653425	GPR30_NES;GPR30-E2_NES	0.144884	1	-0.182879	-1.808	0.000579515	0.00866667	-0.796787	-9.92104	0.00640713	0.0346998	-0.613907	-5.22464	36	36	5	68.326	323.31	11138000000	312	30	30	34	33	33	29	43	40	40	B4DXZ6;P51114	Fragile X mental retardation syndrome-related protein 1	FXR1	tr|B4DXZ6|B4DXZ6_HUMAN Fragile X mental retardation syndrome-related protein 1 OS=Homo sapiens OX=9606 GN=FXR1 PE=1 SV=1;sp|P51114|FXR1_HUMAN Fragile X mental retardation syndrome-related protein 1 OS=Homo sapiens OX=9606 GN=FXR1 PE=1 SV=3	anatomical structure development;apoptosis;biological regulation;cell death;cell differentiation;cellular developmental process;cellular process;death;developmental process;muscle organ development;muscle structure development;negative regulation of biological process;negative regulation of biosynthetic process;negative regulation of cellular biosynthetic process;negative regulation of cellular m…	binding;G-quadruplex RNA binding;mRNA 3'-UTR binding;mRNA binding;nucleic acid binding;RNA binding
24.6788	24.9705	24.9457	24.1849	24.1929	24.6493	25.0494	26.3241	26.6802		0.696082		0.313043		0.449722		0.0437027	1	-0.522671	-2.90944	0.0318855	0.0881268	-1.67557	-3.23297	0.0839853	0.185565	-1.15289	-2.28861	36	36	36	246.6	198.19	537310000	118	8	11	7	7	7	6	14	27	31	H0Y6I0;Q13439	Golgin subfamily A member 4	GOLGA4	tr|H0Y6I0|H0Y6I0_HUMAN Golgin subfamily A member 4 (Fragment) OS=Homo sapiens OX=9606 GN=GOLGA4 PE=1 SV=1;sp|Q13439|GOGA4_HUMAN Golgin subfamily A member 4 OS=Homo sapiens OX=9606 GN=GOLGA4 PE=1 SV=1	biological regulation;cellular process;establishment of localization;establishment of localization in cell;establishment of protein localization;establishment of protein localization in Golgi;establishment of protein localization to organelle;Golgi to plasma membrane protein transport;Golgi to plasma membrane transport;Golgi vesicle transport;intracellular protein transport;intracellular transpor…	binding;enzyme binding;GTPase binding;protein binding
27.8091	27.7873	27.4257	27.6865	27.8795	27.5794	27.5544	27.4321	27.0222		1.0289		1.30036		1.26384		0.80046	1	0.0411053	0.27008	0.10761	0.192954	0.378915	2.06688	0.171997	0.305925	0.337809	1.66126	36	36	36	126.39	280.59	2181900000	221	30	17	24	29	18	24	25	24	30	M0R2B7;P28340;A0A087WYJ2;M0QZR8;A0A2R8Y7K6	DNA polymerase;DNA polymerase delta catalytic subunit	POLD1	tr|M0R2B7|M0R2B7_HUMAN DNA polymerase OS=Homo sapiens OX=9606 GN=POLD1 PE=1 SV=1;sp|P28340|DPOD1_HUMAN DNA polymerase delta catalytic subunit OS=Homo sapiens OX=9606 GN=POLD1 PE=1 SV=2;tr|A0A087WYJ2|A0A087WYJ2_HUMAN DNA polymerase OS=Homo sapiens OX=9606 G	anatomical structure homeostasis;base-excision repair;base-excision repair, gap-filling;biological regulation;biosynthetic process;cell cycle;cellular biosynthetic process;cellular component organization;cellular component organization at cellular level;cellular component organization or biogenesis;cellular component organization or biogenesis at cellular level;cellular macromolecule biosynthetic…	3'-5' exonuclease activity;3'-5'-exodeoxyribonuclease activity;4 iron, 4 sulfur cluster binding;binding;catalytic activity;cation binding;chromatin binding;damaged DNA binding;deoxyribonuclease activity;DNA binding;DNA polymerase activity;DNA-directed DNA polymerase activity;exodeoxyribonuclease activity;exodeoxyribonuclease activity, producing 5'-phosphomonoesters;exonuclease activity;exonucleas…
24.5375	24.8068	24.6031	24.2118	24.5581	24.4447	25.7395	25.7834	25.7477		0.844237	+	0.391754	+	0.464033	GPR30_NES;GPR30-E2_NES	0.13398	1	-0.24428	-1.87547	0.000193293	0.00411321	-1.35198	-13.1475	0.000175252	0.00272	-1.1077	-13.4797	36	36	34	339.59	88.782	423450000	98	8	5	10	4	6	9	22	16	18	O94915;F2Z2S2;A0A6E1XQM6;A0A2C9F2R7	Protein furry homolog-like	FRYL	sp|O94915|FRYL_HUMAN Protein furry homolog-like OS=Homo sapiens OX=9606 GN=FRYL PE=1 SV=2;tr|F2Z2S2|F2Z2S2_HUMAN Protein furry homolog-like OS=Homo sapiens OX=9606 GN=FRYL PE=1 SV=1;tr|A0A6E1XQM6|A0A6E1XQM6_HUMAN Protein furry homolog-like OS=Homo sapiens	biological regulation;biosynthetic process;cellular biosynthetic process;cellular macromolecule biosynthetic process;cellular macromolecule metabolic process;cellular metabolic process;cellular nitrogen compound metabolic process;cellular process;macromolecule biosynthetic process;macromolecule metabolic process;metabolic process;nitrogen compound metabolic process;nucleic acid metabolic process;…
29.8765	29.6722	29.4991	29.7366	29.7986	29.4845	29.341	29.6508	29.2154		0.993562		1.20652		1.21434		0.951955	1	-0.00931803	-0.0641147	0.16807	0.269146	0.270852	1.68094	0.173138	0.307351	0.28017	1.65563	36	36	36	119.52	265.28	9072500000	244	29	29	26	33	24	24	31	26	22	O95373	Importin-7	IPO7	sp|O95373|IPO7_HUMAN Importin-7 OS=Homo sapiens OX=9606 GN=IPO7 PE=1 SV=1	biological regulation;cellular process;cellular response to stimulus;defense response;establishment of localization;establishment of localization in cell;establishment of protein localization;immune response;immune system process;innate immune response;intracellular protein transport;intracellular transport;nuclear import;nuclear transport;nucleocytoplasmic transport;protein import;protein import…	binding;enzyme binding;enzyme regulator activity;GTPase binding;GTPase regulator activity;nucleoside-triphosphatase regulator activity;protein binding;Ran GTPase binding;Ras GTPase binding;small GTPase binding;transporter activity
25.503	25.515	25.3614	25.2494	25.467	25.4834	25.513	25.7119	25.4916		0.959364		0.887475		0.925066		0.543016	1	-0.0598494	-0.663986	0.169844	0.270969	-0.172221	-1.67199	0.260261	0.410232	-0.112371	-1.31033	36	36	36	319.37	93.495	525620000	141	14	12	18	10	13	16	15	19	24	P21359;H0Y465;J3KSB5	Neurofibromin;Neurofibromin truncated	NF1	sp|P21359|NF1_HUMAN Neurofibromin OS=Homo sapiens OX=9606 GN=NF1 PE=1 SV=2;tr|H0Y465|H0Y465_HUMAN Neurofibromin (Fragment) OS=Homo sapiens OX=9606 GN=NF1 PE=1 SV=1;tr|J3KSB5|J3KSB5_HUMAN Neurofibromin (Fragment) OS=Homo sapiens OX=9606 GN=NF1 PE=1 SV=1	actin cytoskeleton organization;actin filament-based process;adrenal gland development;anatomical structure development;anatomical structure morphogenesis;artery morphogenesis;associative learning;astrocyte development;axon ensheathment;behavior;biological regulation;blood vessel morphogenesis;brain development;camera-type eye morphogenesis;cell communication;cell development;cell differentiation…	alcohol binding;amine binding;binding;cation binding;enzyme activator activity;enzyme regulator activity;GTPase activator activity;GTPase regulator activity;ion binding;lipid binding;nucleoside-triphosphatase regulator activity;phosphatidylcholine binding;phosphatidylethanolamine binding;phospholipid binding;quaternary ammonium group binding
28.7543	28.7384	28.7893	28.8986	28.7525	28.6755	28.9641	29.1417	29.0295		1.01037		0.829563	+	0.821047	GPR30_NES	0.83531	1	0.0148862	0.221832	0.0319715	0.0881784	-0.269577	-3.23013	0.00620951	0.0345078	-0.284463	-5.27062	36	36	31	83.434	187.52	5584700000	247	26	28	20	27	27	23	28	37	31	P26639	Threonine--tRNA ligase, cytoplasmic	TARS	sp|P26639|SYTC_HUMAN Threonine--tRNA ligase 1, cytoplasmic OS=Homo sapiens OX=9606 GN=TARS1 PE=1 SV=3	amine metabolic process;amino acid activation;biosynthetic process;carboxylic acid metabolic process;cellular amine metabolic process;cellular amino acid metabolic process;cellular biosynthetic process;cellular ketone metabolic process;cellular macromolecule biosynthetic process;cellular macromolecule metabolic process;cellular metabolic process;cellular nitrogen compound metabolic process;cellul…	adenyl nucleotide binding;adenyl ribonucleotide binding;aminoacyl-tRNA ligase activity;ATP binding;binding;catalytic activity;identical protein binding;ligase activity;ligase activity, forming aminoacyl-tRNA and related compounds;ligase activity, forming carbon-oxygen bonds;nucleotide binding;protein binding;protein dimerization activity;protein homodimerization activity;purine nucleotide binding…
28.0475	28.0607	27.7416	28.0118	27.9665	27.8323	28.6986	28.6744	28.5302		0.990981	+	0.616626	+	0.622238	GPR30_NES;GPR30-E2_NES	0.916683	1	-0.0130711	-0.111377	0.000754631	0.0107327	-0.697533	-9.26521	0.00422743	0.0280757	-0.684462	-5.86202	36	36	22	104.55	206.67	3642100000	217	23	21	25	24	17	24	24	30	29	P63010;A0A087X253;A0A087WU93;A0A087WZQ6;A0A087WYD1	AP-2 complex subunit beta	AP2B1	sp|P63010|AP2B1_HUMAN AP-2 complex subunit beta OS=Homo sapiens OX=9606 GN=AP2B1 PE=1 SV=1;tr|A0A087X253|A0A087X253_HUMAN AP complex subunit beta OS=Homo sapiens OX=9606 GN=AP2B1 PE=1 SV=1;tr|A0A087WU93|A0A087WU93_HUMAN AP-2 complex subunit beta (Fragment)	antigen processing and presentation;antigen processing and presentation of exogenous antigen;antigen processing and presentation of exogenous peptide antigen;antigen processing and presentation of exogenous peptide antigen via MHC class II;antigen processing and presentation of peptide antigen;antigen processing and presentation of peptide antigen via MHC class II;antigen processing and presentat…	binding;clathrin binding;peptide binding;protein binding;protein transporter activity;signal sequence binding;substrate-specific transporter activity;transporter activity
32.8174	32.6217	33.3366	33.1457	32.8937	33.3681	32.6034	32.0933	32.8306		1.15717		1.54406		1.33434		0.452883	1	0.210595	0.830635	0.0716859	0.144974	0.626727	2.43381	0.244163	0.391212	0.416131	1.36439	36	36	36	90.583	323.31	85024000000	402	44	34	50	53	39	46	50	37	49	Q00839;A0A1W2PPS1;A0A1X7SBS1;A0A1W2PP35;Q5RI18;A0A1W2PPH7;A0A1W2PPL4;A0A1W2PP34;A0A1W2PQL0;A0A1W2PQ74;A0A1W2PRZ7	Heterogeneous nuclear ribonucleoprotein U	HNRNPU	sp|Q00839|HNRPU_HUMAN Heterogeneous nuclear ribonucleoprotein U OS=Homo sapiens OX=9606 GN=HNRNPU PE=1 SV=6;tr|A0A1W2PPS1|A0A1W2PPS1_HUMAN Heterogeneous nuclear ribonucleoprotein U OS=Homo sapiens OX=9606 GN=HNRNPU PE=1 SV=1;tr|A0A1X7SBS1|A0A1X7SBS1_HUMAN	biological regulation;cell differentiation;cellular developmental process;cellular macromolecule metabolic process;cellular metabolic process;cellular nitrogen compound metabolic process;cellular process;circadian regulation of gene expression;circadian rhythm;CRD-mediated mRNA stabilization;developmental process;gene expression;macromolecule metabolic process;metabolic process;mRNA metabolic pro…	adenyl nucleotide binding;adenyl ribonucleotide binding;ATP binding;binding;core promoter binding;DNA binding;nucleic acid binding;nucleotide binding;purine nucleotide binding;purine ribonucleoside triphosphate binding;purine ribonucleotide binding;regulatory region DNA binding;regulatory region nucleic acid binding;ribonucleotide binding;RNA binding;transcription regulatory region DNA binding
28.4126	28.8306	28.4064	28.3784	28.6902	28.3366	28.3233	28.7612	28.0753		0.945099		1.05832		1.1198		0.67312	1	-0.0814622	-0.45438	0.739556	0.852197	0.0817738	0.356385	0.541332	0.702012	0.163236	0.666906	36	36	36	86.47	207.73	4210800000	254	29	29	22	34	25	23	30	35	27	Q08J23	tRNA (cytosine(34)-C(5))-methyltransferase	NSUN2	sp|Q08J23|NSUN2_HUMAN RNA cytosine C(5)-methyltransferase NSUN2 OS=Homo sapiens OX=9606 GN=NSUN2 PE=1 SV=2	cell cycle phase;cell cycle process;cell division;cellular component organization;cellular component organization at cellular level;cellular component organization or biogenesis;cellular component organization or biogenesis at cellular level;cellular macromolecule metabolic process;cellular metabolic process;cellular nitrogen compound metabolic process;cellular process;macromolecule metabolic pro…	binding;catalytic activity;methyltransferase activity;nucleic acid binding;RNA binding;RNA methyltransferase activity;S-adenosylmethionine-dependent methyltransferase activity;transferase activity;transferase activity, transferring one-carbon groups;tRNA (cytosine) methyltransferase activity;tRNA (cytosine-5-)-methyltransferase activity;tRNA binding;tRNA methyltransferase activity
26.7519	26.9679	27.2385	26.8528	26.5019	26.9054	27.2419	27.1384	27.3322		0.851048		0.714931		0.840059		0.286471	1	-0.232687	-1.22887	0.0249848	0.0740236	-0.484124	-3.49608	0.172288	0.306415	-0.251437	-1.65982	36	36	36	226.66	207.29	1594600000	187	20	14	21	21	12	21	25	19	34	Q14676	Mediator of DNA damage checkpoint protein 1	MDC1	sp|Q14676|MDC1_HUMAN Mediator of DNA damage checkpoint protein 1 OS=Homo sapiens OX=9606 GN=MDC1 PE=1 SV=3	biological regulation;cell cycle checkpoint;cellular macromolecule metabolic process;cellular metabolic process;cellular nitrogen compound metabolic process;cellular process;cellular protein metabolic process;cellular response to stimulus;cellular response to stress;DNA damage checkpoint;DNA integrity checkpoint;DNA metabolic process;DNA recombination;DNA repair;double-strand break repair;double-…	binding;FHA domain binding;protein binding;protein C-terminus binding;protein domain specific binding
28.527	28.6607	28.538	28.4178	28.4683	28.5137	28.8042	29.0373	28.9964		0.927457	+	0.717297		0.773402	GPR30-E2_NES	0.100267	1	-0.108647	-2.12947	0.00339246	0.0226042	-0.479357	-6.22433	0.0114168	0.0519418	-0.37071	-4.43059	36	36	36	164.98	222.47	4976200000	229	25	24	21	23	21	24	29	31	31	Q14C86;F8W9S7;C9IZ08	GTPase-activating protein and VPS9 domain-containing protein 1	GAPVD1	sp|Q14C86|GAPD1_HUMAN GTPase-activating protein and VPS9 domain-containing protein 1 OS=Homo sapiens OX=9606 GN=GAPVD1 PE=1 SV=2;tr|F8W9S7|F8W9S7_HUMAN GTPase-activating protein and VPS9 domain-containing protein 1 OS=Homo sapiens OX=9606 GN=GAPVD1 PE=1 SV	biological regulation;cellular component organization;cellular component organization or biogenesis;cellular membrane organization;cellular process;cellular response to stimulus;endocytosis;establishment of localization;membrane invagination;membrane organization;positive regulation of catalytic activity;positive regulation of GTPase activity;positive regulation of hydrolase activity;positive reg…	binding;enzyme activator activity;enzyme regulator activity;GTPase activating protein binding;GTPase activator activity;GTPase regulator activity;guanyl-nucleotide exchange factor activity;nucleoside-triphosphatase regulator activity;protein binding
27.6012	27.8466	27.6125	27.2948	27.305	27.6289	28.0028	28.2404	28.1807		0.825201	+	0.602186		0.729745	GPR30-E2_NES	0.110724	1	-0.277182	-2.04175	0.00501841	0.0262111	-0.731719	-5.59189	0.0132577	0.0565868	-0.454536	-4.24056	36	36	6	175.29	213.35	2780300000	209	22	18	24	17	18	21	25	33	31	Q5SW79	Centrosomal protein of 170 kDa	CEP170	sp|Q5SW79|CE170_HUMAN Centrosomal protein of 170 kDa OS=Homo sapiens OX=9606 GN=CEP170 PE=1 SV=1
26.5578	26.8251	27.0916	26.5253	26.7114	26.9774	27.0316	27.3857	27.4579		0.941607		0.681272		0.723521		0.690091	1	-0.0868028	-0.428892	0.0407985	0.101577	-0.553696	-2.97852	0.0826681	0.183934	-0.466894	-2.30297	36	36	4	151.42	219.94	1614100000	200	17	20	24	15	16	21	27	27	33	Q8TEW0;Q5VWU8	Partitioning defective 3 homolog	PARD3	sp|Q8TEW0|PARD3_HUMAN Partitioning defective 3 homolog OS=Homo sapiens OX=9606 GN=PARD3 PE=1 SV=2;tr|Q5VWU8|Q5VWU8_HUMAN Partitioning defective 3 homolog OS=Homo sapiens OX=9606 GN=PARD3 PE=1 SV=1	actin filament-based process;actin-mediated cell contraction;activation of protein kinase activity;activation of protein kinase C activity by G-protein coupled receptor protein signaling pathway;anatomical structure morphogenesis;apical constriction;asymmetric cell division;axon ensheathment;axonogenesis;biological regulation;cell cycle;cell division;cell junction assembly;cell junction organizat…	binding;lipid binding;phosphatidylinositol binding;phosphatidylinositol-3,4,5-trisphosphate binding;phosphatidylinositol-3-phosphate binding;phosphatidylinositol-4,5-bisphosphate binding;phospholipid binding
25.856	25.7253	25.4525	26.0418	26.1108	25.9061	26.0914	25.9611	26.058		1.26721		0.988126		0.779765		0.0623002	1	0.341656	2.56511	0.821896	0.902911	-0.0172329	-0.24032	0.0455384	0.12851	-0.358889	-2.86848	36	36	33	206.69	149.73	697410000	153	12	14	13	15	18	21	19	20	21	Q8WWQ0	PH-interacting protein	PHIP	sp|Q8WWQ0|PHIP_HUMAN PH-interacting protein OS=Homo sapiens OX=9606 GN=PHIP PE=1 SV=2	biological regulation;cell surface receptor linked signaling pathway;cellular component organization;cellular component organization at cellular level;cellular component organization or biogenesis;cellular component organization or biogenesis at cellular level;cellular process;cellular response to chemical stimulus;cellular response to endogenous stimulus;cellular response to hormone stimulus;cel…	binding;histone acetyl-lysine binding;histone binding;insulin receptor binding;protein binding;protein complex binding;receptor binding
26.5437	26.6939	27.4516	29.7891	25.383	26.7804	28.4494	28.407	28.9103		1.33899		0.414269	+	0.309389	GPR30_NES	0.767342	1	0.421148	0.316656	0.386726	0.519122	-1.27136	-0.970563	0.00640441	0.0347663	-1.69251	-5.22526	36	36	36	233.11	323.31	3423500000	92	5	5	6	7	2	6	20	18	23	Q92614;A0A0D9SFK2	Unconventional myosin-XVIIIa	MYO18A	sp|Q92614|MY18A_HUMAN Unconventional myosin-XVIIIa OS=Homo sapiens OX=9606 GN=MYO18A PE=1 SV=3;tr|A0A0D9SFK2|A0A0D9SFK2_HUMAN Unconventional myosin-XVIIIa OS=Homo sapiens OX=9606 GN=MYO18A PE=1 SV=1	actin cytoskeleton organization;actin filament-based process;actomyosin structure organization;asymmetric Golgi ribbon formation;biological regulation;cell migration;cell motility;cellular component movement;cellular component organization;cellular component organization at cellular level;cellular component organization or biogenesis;cellular component organization or biogenesis at cellular level…	actin binding;actin filament binding;adenyl nucleotide binding;adenyl ribonucleotide binding;ADP binding;ATP binding;binding;catalytic activity;cytoskeletal protein binding;DNA binding;hydrolase activity;hydrolase activity, acting on acid anhydrides;hydrolase activity, acting on acid anhydrides, in phosphorus-containing anhydrides;motor activity;nucleic acid binding;nucleoside-triphosphatase acti…
28.434	28.6255	28.8317	28.5557	28.5975	28.8964	28.23	28.1111	28.2583		1.03727	+	1.39806		1.34783	GPR30-E2_NES	0.753872	1	0.0527859	0.335835	0.0142197	0.0486541	0.483424	4.15351	0.0251206	0.0874675	0.430638	3.4901	36	36	36	113.79	221.02	4020300000	246	29	24	27	31	23	31	30	21	30	Q9NSE4	Isoleucine--tRNA ligase, mitochondrial	IARS2	sp|Q9NSE4|SYIM_HUMAN Isoleucine--tRNA ligase, mitochondrial OS=Homo sapiens OX=9606 GN=IARS2 PE=1 SV=2	amine metabolic process;amino acid activation;biosynthetic process;carboxylic acid metabolic process;cellular amine metabolic process;cellular amino acid metabolic process;cellular biosynthetic process;cellular component organization;cellular component organization at cellular level;cellular component organization or biogenesis;cellular component organization or biogenesis at cellular level;cellu…	adenyl nucleotide binding;adenyl ribonucleotide binding;aminoacyl-tRNA editing activity;aminoacyl-tRNA ligase activity;ATP binding;binding;carboxylic ester hydrolase activity;catalytic activity;hydrolase activity;hydrolase activity, acting on ester bonds;isoleucine-tRNA ligase activity;ligase activity;ligase activity, forming aminoacyl-tRNA and related compounds;ligase activity, forming carbon-ox…
29.7275	29.8915	29.69	29.6247	29.8314	29.7795	29.8819	30.094	30.1002		0.983172		0.823482		0.837577		0.793825	1	-0.024484	-0.279351	0.0418611	0.103367	-0.28019	-2.9526	0.054158	0.142335	-0.255706	-2.69886	36	36	36	111.08	323.31	10910000000	290	29	28	37	30	30	28	32	38	38	Q9Y6Y8	SEC23-interacting protein	SEC23IP	sp|Q9Y6Y8|S23IP_HUMAN SEC23-interacting protein OS=Homo sapiens OX=9606 GN=SEC23IP PE=1 SV=1	acrosome assembly;anatomical structure formation involved in morphogenesis;cellular component assembly;cellular component assembly at cellular level;cellular component assembly involved in morphogenesis;cellular component organization;cellular component organization at cellular level;cellular component organization or biogenesis;cellular component organization or biogenesis at cellular level;cell…	binding;cation binding;ion binding;metal ion binding
29.6793	29.6631	29.9841	29.5843	29.6867	29.9573	27.0424	26.4303	27.221		0.977564	+	7.1844	+	7.34929	GPR30_NES;GPR30-E2_NES	0.840593	1	-0.0327371	-0.214576	0.000420521	0.00581295	2.84487	10.776	0.000385845	0.00876364	2.8776	11.017	35	35	34	111.41	241.68	5628400000	237	33	34	37	34	24	37	14	9	15	A0A494C039;Q9Y4L1;A0A087X054;E9PJ21;A0A087WWI4;K7EQK2	Hypoxia up-regulated protein 1	HYOU1	tr|A0A494C039|A0A494C039_HUMAN Hypoxia up-regulated protein 1 OS=Homo sapiens OX=9606 GN=HYOU1 PE=1 SV=1;sp|Q9Y4L1|HYOU1_HUMAN Hypoxia up-regulated protein 1 OS=Homo sapiens OX=9606 GN=HYOU1 PE=1 SV=1;tr|A0A087X054|A0A087X054_HUMAN Hypoxia up-regulated pro	biological regulation;cellular component organization;cellular component organization or biogenesis;cellular macromolecule metabolic process;cellular membrane organization;cellular metabolic process;cellular process;cellular protein metabolic process;cellular response to chemical stimulus;cellular response to hypoxia;cellular response to organic substance;cellular response to oxygen levels;cellul…	adenyl nucleotide binding;adenyl ribonucleotide binding;ATP binding;binding;chaperone binding;nucleotide binding;protein binding;purine nucleotide binding;purine ribonucleoside triphosphate binding;purine ribonucleotide binding;ribonucleotide binding
28.5902	28.565	28.1872	28.4449	28.4484	28.3543	28.4245	28.6671	28.3419		0.978352		0.957992		0.979189		0.825186	1	-0.0315742	-0.235777	0.577838	0.725554	-0.0619151	-0.604975	0.861247	0.926847	-0.0303408	-0.18634	35	35	35	150.25	188.44	3855000000	198	18	23	19	19	21	21	22	30	25	O95163;A0A6Q8PHF4;A0A6Q8PG86;A0A6Q8PEX6;A0A6Q8PFB7;A0A6Q8PHC9;A0A6Q8PGW3;A0A6Q8PF66;A0A6Q8PFH9;A0A6Q8PHI5;A0A6Q8PH48;F5H2T0;A0A6Q8PFN8;A0A6Q8PHA0;A0A6Q8PGR0;A0A6Q8PF69	Elongator complex protein 1	IKBKAP	sp|O95163|ELP1_HUMAN Elongator complex protein 1 OS=Homo sapiens OX=9606 GN=ELP1 PE=1 SV=3;tr|A0A6Q8PHF4|A0A6Q8PHF4_HUMAN Elongator complex protein 1 OS=Homo sapiens OX=9606 GN=ELP1 PE=1 SV=1;tr|A0A6Q8PG86|A0A6Q8PG86_HUMAN Elongator complex protein 1 OS=Ho	biological regulation;biosynthetic process;cellular biosynthetic process;cellular component assembly;cellular component organization;cellular component organization at cellular level;cellular component organization or biogenesis;cellular component organization or biogenesis at cellular level;cellular macromolecule metabolic process;cellular metabolic process;cellular nitrogen compound metabolic p…	enzyme regulator activity;kinase regulator activity;molecular transducer activity;phosphorylase kinase regulator activity;protein kinase regulator activity;signal transducer activity
27.1339	27.1026	27.1744	27.2829	27.1251	27.2162	27.4189	27.345	27.3331		1.05056		0.896523	+	0.853376	GPR30_NES	0.22955	1	0.0711594	1.4166	0.0410713	0.102222	-0.157587	-2.97179	0.00252504	0.0221258	-0.228746	-6.74022	35	35	14	187.09	90.363	1829000000	153	14	16	17	15	10	19	20	18	24	A0A7I2V5D0;A0A7I2V490;P26358;A0A7I2YQA8;A0A7I2V5F1;A0A7I2YQQ0;A0A7I2V5F6	DNA (cytosine-5)-methyltransferase 1	DNMT1	tr|A0A7I2V5D0|A0A7I2V5D0_HUMAN DNA (cytosine-5)-methyltransferase OS=Homo sapiens OX=9606 GN=DNMT1 PE=1 SV=1;tr|A0A7I2V490|A0A7I2V490_HUMAN DNA (cytosine-5)-methyltransferase OS=Homo sapiens OX=9606 GN=DNMT1 PE=1 SV=1;sp|P26358|DNMT1_HUMAN DNA (cytosine-5)	biological regulation;biosynthetic process;cellular biosynthetic process;cellular component organization;cellular component organization at cellular level;cellular component organization or biogenesis;cellular component organization or biogenesis at cellular level;cellular macromolecule biosynthetic process;cellular macromolecule metabolic process;cellular metabolic process;cellular nitrogen comp…	binding;catalytic activity;cation binding;chromatin binding;DNA (cytosine-5-)-methyltransferase activity;DNA binding;DNA-methyltransferase activity;ion binding;metal ion binding;methyl-CpG binding;methyltransferase activity;nucleic acid binding;nucleotide binding;RNA binding;S-adenosylmethionine-dependent methyltransferase activity;sequence-specific DNA binding;transferase activity;transferase ac…
27.5522	27.1833	28.0582	27.3764	26.8993	27.6249	28.8145	28.7225	29.0205		0.813564	+	0.340972	+	0.419109	GPR30_NES;GPR30-E2_NES	0.419487	1	-0.297673	-0.898982	0.00252956	0.0188184	-1.55228	-6.73699	0.00949631	0.0484032	-1.2546	-4.67311	35	31	0	84.711	323.31	3671400000	190	17	17	23	14	13	17	26	32	31	A8K968;A0A0J9YY18			tr|A8K968|A8K968_HUMAN Band 4.1-like protein 3 OS=Homo sapiens OX=9606 GN=EPB41L3 PE=1 SV=1;tr|A0A0J9YY18|A0A0J9YY18_HUMAN Band 4.1-like protein 3 (Fragment) OS=Homo sapiens OX=9606 GN=EPB41L3 PE=1 SV=1	actin cytoskeleton organization;actin filament-based process;cellular component organization;cellular component organization at cellular level;cellular component organization or biogenesis;cellular component organization or biogenesis at cellular level;cellular process;cortical actin cytoskeleton organization;cortical cytoskeleton organization;cytoskeleton organization;organelle organization	structural molecule activity
30.4271	29.9765	30.5253	30.2651	29.8215	30.2885	30.4859	29.7734	30.1884		0.879863		0.983365		1.11763		0.462002	1	-0.18465	-0.812678	0.929349	0.965071	-0.0242017	-0.0943759	0.580147	0.736806	0.160448	0.601149	35	34	32	102.47	323.31	13672000000	282	28	28	30	28	24	29	36	37	42	P07197;E7ESP9;E7EMV2	Neurofilament medium polypeptide	NEFM	sp|P07197|NFM_HUMAN Neurofilament medium polypeptide OS=Homo sapiens OX=9606 GN=NEFM PE=1 SV=3;tr|E7ESP9|E7ESP9_HUMAN 160 kDa neurofilament protein OS=Homo sapiens OX=9606 GN=NEFM PE=1 SV=1;tr|E7EMV2|E7EMV2_HUMAN 160 kDa neurofilament protein OS=Homo sapie	axon cargo transport;biological regulation;cellular component assembly;cellular component assembly at cellular level;cellular component movement;cellular component organization;cellular component organization at cellular level;cellular component organization or biogenesis;cellular component organization or biogenesis at cellular level;cellular process;cytoskeleton organization;cytoskeleton-depend…	binding;cytoskeletal protein binding;microtubule binding;protein binding;structural constituent of cytoskeleton;structural molecule activity;tubulin binding
28.9726	29.1117	28.993	28.8989	29.1765	28.9903	28.9539	29.2242	28.9453		0.997313		0.98675		0.989409		0.968536	1	-0.00388209	-0.0419674	0.882991	0.939513	-0.0192439	-0.15681	0.886838	0.940314	-0.0153618	-0.151604	35	35	35	101.53	151.21	5850600000	269	28	32	30	29	31	30	31	32	26	H0Y938;H0YAC7;P35606;A0A7I2V258	Coatomer subunit beta	COPB2	tr|H0Y938|H0Y938_HUMAN Coatomer subunit beta OS=Homo sapiens OX=9606 GN=COPB2 PE=1 SV=2;tr|H0YAC7|H0YAC7_HUMAN Coatomer subunit beta OS=Homo sapiens OX=9606 GN=COPB2 PE=1 SV=2;sp|P35606|COPB2_HUMAN Coatomer subunit beta OS=Homo sapiens OX=9606 GN=COPB2	cellular component organization;cellular component organization at cellular level;cellular component organization or biogenesis;cellular component organization or biogenesis at cellular level;cellular process;COPI coating of Golgi vesicle;establishment of localization;establishment of localization in cell;establishment of protein localization;Golgi transport vesicle coating;Golgi vesicle transpor…	structural molecule activity
25.9963	25.636	23.8207	25.0051	24.1482	23.7231	25.8076	25.9919	25.3855		0.551372		0.36953		0.670202		0.328026	1	-0.858903	-1.11315	0.0263051	0.0772392	-1.43624	-3.43953	0.453896	0.615705	-0.577332	-0.828625	35	35	9	231.43	75.298	479340000	87	6	7	8	7	5	7	16	16	15	O14578	Citron Rho-interacting kinase	CIT	sp|O14578|CTRO_HUMAN Citron Rho-interacting kinase OS=Homo sapiens OX=9606 GN=CIT PE=1 SV=2	anatomical structure development;biological regulation;cell cycle phase;cell cycle process;cell differentiation;cell projection organization;cellular component organization;cellular component organization at cellular level;cellular component organization or biogenesis;cellular component organization or biogenesis at cellular level;cellular developmental process;cellular process;cellular response …	adenyl nucleotide binding;adenyl ribonucleotide binding;ATP binding;binding;catalytic activity;cation binding;ion binding;kinase activity;metal ion binding;nucleotide binding;PDZ domain binding;phosphotransferase activity, alcohol group as acceptor;protein binding;protein domain specific binding;protein kinase activity;protein serine/threonine kinase activity;purine nucleotide binding;purine ribo…
27.7315	28.0797	27.8827	27.6939	27.8667	27.7676	27.8996	28.277	28.0828		0.918985		0.806417		0.877509		0.339786	1	-0.121887	-1.08285	0.0607942	0.13087	-0.310401	-2.58828	0.272952	0.423841	-0.188514	-1.26995	35	35	35	130.16	183.6	2714200000	185	23	19	18	22	14	18	26	23	22	O14617;A0A2R8Y611	AP-3 complex subunit delta-1	AP3D1	sp|O14617|AP3D1_HUMAN AP-3 complex subunit delta-1 OS=Homo sapiens OX=9606 GN=AP3D1 PE=1 SV=1;tr|A0A2R8Y611|A0A2R8Y611_HUMAN AP-3 complex subunit delta (Fragment) OS=Homo sapiens OX=9606 GN=AP3D1 PE=1 SV=1	anterograde axon cargo transport;anterograde synaptic vesicle transport;antigen processing and presentation;antigen processing and presentation of exogenous antigen;antigen processing and presentation of lipid antigen via MHC class Ib;antigen processing and presentation via MHC class Ib;antigen processing and presentation, exogenous lipid antigen via MHC class Ib;axon cargo transport;biological r…	transporter activity
28.0078	28.1389	27.8476	27.9952	27.9671	27.6913	28.3862	28.6756	28.2348		0.924285		0.684122		0.740164		0.426463	1	-0.11359	-0.884348	0.0275657	0.0791184	-0.547674	-3.38859	0.0481702	0.134126	-0.434083	-2.81299	35	35	35	107.89	323.31	3629700000	211	21	25	22	22	17	20	29	25	30	O60763	General vesicular transport factor p115	USO1	sp|O60763|USO1_HUMAN General vesicular transport factor p115 OS=Homo sapiens OX=9606 GN=USO1 PE=1 SV=2	cell cycle;cellular component organization;cellular component organization at cellular level;cellular component organization or biogenesis;cellular component organization or biogenesis at cellular level;cellular membrane fusion;cellular membrane organization;cellular process;ER to Golgi vesicle-mediated transport;establishment of localization;establishment of localization in cell;establishment of…	protein transporter activity;substrate-specific transporter activity;transporter activity
29.0893	29.4205	29.2919	29.0778	29.3285	29.2517	29.1584	29.6523	29.3677		0.967341		0.886704		0.91664		0.713801	1	-0.0479037	-0.393826	0.342479	0.467508	-0.173476	-1.07605	0.507145	0.668841	-0.125572	-0.72763	35	35	5	88.884	207.59	7234800000	228	24	26	24	26	24	26	24	25	29	O75534	Cold shock domain-containing protein E1	CSDE1	sp|O75534|CSDE1_HUMAN Cold shock domain-containing protein E1 OS=Homo sapiens OX=9606 GN=CSDE1 PE=1 SV=2	anatomical structure development;biological regulation;catabolic process;cellular catabolic process;cellular macromolecule catabolic process;cellular macromolecule metabolic process;cellular metabolic process;cellular nitrogen compound metabolic process;cellular process;developmental process;developmental process involved in reproduction;gonad development;macromolecule catabolic process;macromole…	binding;DNA binding;nucleic acid binding
29.861	29.8787	29.9528	29.8822	29.9276	29.9809	30.5434	30.7381	30.8343		1.02294	+	0.584363	+	0.571256	GPR30_NES;GPR30-E2_NES	0.459831	1	0.0327269	0.816928	0.00100752	0.0109483	-0.775063	-8.59347	0.000855329	0.0178462	-0.807789	-8.96836	35	35	14	75.872	229.59	15082000000	344	34	41	36	35	35	33	37	44	49	P08133	Annexin A6	ANXA6	sp|P08133|ANXA6_HUMAN Annexin A6 OS=Homo sapiens OX=9606 GN=ANXA6 PE=1 SV=3	biological regulation;calcium ion transport;cation transport;cellular component assembly;cellular component organization;cellular component organization or biogenesis;cellular process;divalent inorganic cation transport;divalent metal ion transport;establishment of localization;ion transmembrane transport;ion transport;macromolecular complex assembly;macromolecular complex subunit organization;me…	binding;calcium ion binding;calcium-dependent phospholipid binding;calcium-dependent protein binding;cation binding;channel activity;cholesterol binding;gated channel activity;GTP binding;guanyl nucleotide binding;guanyl ribonucleotide binding;identical protein binding;ion binding;ion channel activity;ion transmembrane transporter activity;ligand-gated channel activity;ligand-gated ion channel ac…
32.3205	32.6459	32.2074	32.1994	32.4345	32.292	32.0035	32.402	32.3185		0.944324		1.04774		1.10951		0.606696	1	-0.0826467	-0.557843	0.65432	0.792518	0.0672785	0.483032	0.449153	0.611617	0.149925	0.838063	35	35	0	70.897	323.31	59842000000	414	44	43	46	44	43	47	49	46	52	P11142;E9PKE3;E9PNE6;E9PN89	Heat shock cognate 71 kDa protein	HSPA8	sp|P11142|HSP7C_HUMAN Heat shock cognate 71 kDa protein OS=Homo sapiens OX=9606 GN=HSPA8 PE=1 SV=1;tr|E9PKE3|E9PKE3_HUMAN Heat shock cognate 71 kDa protein OS=Homo sapiens OX=9606 GN=HSPA8 PE=1 SV=1;tr|E9PNE6|E9PNE6_HUMAN Heat shock cognate 71 kDa protein	axon guidance;biological regulation;biosynthetic process;cell communication;cell-cell signaling;cellular biosynthetic process;cellular component disassembly;cellular component disassembly at cellular level;cellular component organization;cellular component organization at cellular level;cellular component organization or biogenesis;cellular component organization or biogenesis at cellular level;c…	adenyl nucleotide binding;adenyl ribonucleotide binding;antigen binding;ATP binding;ATPase activity;ATPase activity, coupled;binding;C3HC4-type RING finger domain binding;catalytic activity;enzyme binding;G-protein-coupled receptor binding;heat shock protein binding;hydrolase activity;hydrolase activity, acting on acid anhydrides;hydrolase activity, acting on acid anhydrides, in phosphorus-contai…
29.644	29.9512	29.5204	29.7005	29.8741	29.6448	29.4942	30.0593	29.4926		1.0243		1.04086		1.01616		0.823505	1	0.0346432	0.238097	0.787939	0.881164	0.0577717	0.287599	0.924082	0.960631	0.0231285	0.101441	35	35	28	107.77	224.53	9454300000	253	25	27	30	30	30	24	30	29	28	P22102	Trifunctional purine biosynthetic protein adenosine-3;Phosphoribosylamine--glycine ligase;Phosphoribosylformylglycinamidine cyclo-ligase;Phosphoribosylglycinamide formyltransferase	GART	sp|P22102|PUR2_HUMAN Trifunctional purine biosynthetic protein adenosine-3 OS=Homo sapiens OX=9606 GN=GART PE=1 SV=1	amine metabolic process;anatomical structure development;aromatic compound biosynthetic process;biosynthetic process;brainstem development;carboxylic acid metabolic process;cellular amine metabolic process;cellular amino acid metabolic process;cellular aromatic compound metabolic process;cellular biosynthetic process;cellular ketone metabolic process;cellular metabolic process;cellular nitrogen c…	adenyl nucleotide binding;adenyl ribonucleotide binding;ATP binding;binding;catalytic activity;cation binding;cyclo-ligase activity;hydroxymethyl-, formyl- and related transferase activity;ion binding;ligase activity;ligase activity, forming carbon-nitrogen bonds;metal ion binding;methyltransferase activity;nucleotide binding;phosphoribosylamine-glycine ligase activity;phosphoribosylformylglycina…
24.4144	24.8312	24.7948	24.0429	24.6714	24.7473	28.5084	28.2154	28.395		0.874843	+	0.0676521	+	0.0773306	GPR30_NES;GPR30-E2_NES	0.499286	1	-0.192904	-0.742011	8.36828e-05	0.0014375	-3.88572	-16.2615	1.9971e-05	0	-3.69282	-23.3407	35	35	28	100.07	174.06	2050000000	111	7	5	3	5	7	5	28	25	26	P35221;G3XAM7	Catenin alpha-1	CTNNA1	sp|P35221|CTNA1_HUMAN Catenin alpha-1 OS=Homo sapiens OX=9606 GN=CTNNA1 PE=1 SV=1;tr|G3XAM7|G3XAM7_HUMAN Catenin (Cadherin-associated protein), alpha 1, 102kDa, isoform CRA_a OS=Homo sapiens OX=9606 GN=CTNNA1 PE=1 SV=1	actin cytoskeleton organization;actin filament organization;actin filament-based process;adherens junction organization;aging;anatomical structure development;anatomical structure morphogenesis;apical junction assembly;axon regeneration;axonogenesis;biological adhesion;biological regulation;cell adhesion;cell differentiation;cell junction assembly;cell junction organization;cell part morphogenesi…	beta-catenin binding;binding;cadherin binding;cell adhesion molecule binding;cytoskeletal protein binding;gamma-catenin binding;protein binding;structural molecule activity;vinculin binding
30.2283	30.0683	30.4432	30.1256	30.0314	30.4039	30.441	30.1958	30.2924		0.959508		0.918413		0.957171		0.721496	1	-0.0596333	-0.382573	0.406921	0.541038	-0.122785	-0.925861	0.6524	0.796068	-0.0631517	-0.485985	35	35	35	60.533	301.27	14870000000	273	31	26	30	33	25	30	38	27	33	P49368;B4DUR8	T-complex protein 1 subunit gamma	CCT3	sp|P49368|TCPG_HUMAN T-complex protein 1 subunit gamma OS=Homo sapiens OX=9606 GN=CCT3 PE=1 SV=4;tr|B4DUR8|B4DUR8_HUMAN T-complex protein 1 subunit gamma OS=Homo sapiens OX=9606 GN=CCT3 PE=1 SV=1	binding of sperm to zona pellucida;cell recognition;cell-cell recognition;cellular component assembly;cellular component assembly at cellular level;cellular component organization;cellular component organization at cellular level;cellular component organization or biogenesis;cellular component organization or biogenesis at cellular level;cellular macromolecule metabolic process;cellular metabolic…	adenyl nucleotide binding;adenyl ribonucleotide binding;ATP binding;binding;nucleotide binding;protein binding;purine nucleotide binding;purine ribonucleoside triphosphate binding;purine ribonucleotide binding;ribonucleotide binding;unfolded protein binding
25.2101	25.4503	23.0145	24.8613	25.8057	24.836	25.7612	25.8692	25.4309		1.52557		0.697635		0.457293		0.507479	1	0.609353	0.727023	0.206904	0.314774	-0.519456	-1.50447	0.224383	0.368801	-1.12881	-1.43586	35	15	15	187.03	70.918	524720000	47	6	4	2	2	4	5	8	10	6	P53675;A0A087WX41	Clathrin heavy chain 2	CLTCL1	sp|P53675|CLH2_HUMAN Clathrin heavy chain 2 OS=Homo sapiens OX=9606 GN=CLTCL1 PE=1 SV=2;tr|A0A087WX41|A0A087WX41_HUMAN Clathrin heavy chain 2 OS=Homo sapiens OX=9606 GN=CLTCL1 PE=1 SV=1	anatomical structure morphogenesis;biological regulation;cell cycle phase;cell cycle process;cellular component organization;cellular component organization at cellular level;cellular component organization or biogenesis;cellular component organization or biogenesis at cellular level;cellular membrane organization;cellular process;cellular response to stimulus;developmental process;endocytosis;es…	molecular transducer activity;signal transducer activity;structural molecule activity
23.7735	25.29	25.5293	25.3943	25.5124	25.7468	25.6935	25.473	25.7519		1.60978		0.940635		0.584326		0.286819	1	0.686862	1.22784	0.545826	0.691936	-0.0882937	-0.659129	0.2359	0.382582	-0.775155	-1.39352	35	35	35	261.51	120.43	547140000	117	6	11	9	13	12	16	20	14	16	Q07864;F5H1D6	DNA polymerase epsilon catalytic subunit A;DNA polymerase	POLE	sp|Q07864|DPOE1_HUMAN DNA polymerase epsilon catalytic subunit A OS=Homo sapiens OX=9606 GN=POLE PE=1 SV=5;tr|F5H1D6|F5H1D6_HUMAN DNA polymerase epsilon catalytic subunit OS=Homo sapiens OX=9606 GN=POLE PE=1 SV=1	anatomical structure homeostasis;base-excision repair, gap-filling;biological regulation;biosynthetic process;cell cycle;cell cycle process;cellular biosynthetic process;cellular component organization;cellular component organization at cellular level;cellular component organization or biogenesis;cellular component organization or biogenesis at cellular level;cellular macromolecule biosynthetic p…	3'-5' exonuclease activity;4 iron, 4 sulfur cluster binding;binding;catalytic activity;cation binding;chromatin binding;DNA binding;DNA polymerase activity;DNA-directed DNA polymerase activity;exonuclease activity;hydrolase activity;hydrolase activity, acting on ester bonds;ion binding;iron-sulfur cluster binding;metal cluster binding;metal ion binding;nuclease activity;nucleic acid binding;nucle…
27.3674	27.0801	27.1261	27.4019	27.2495	26.9138	27.6889	27.7522	27.3869		0.998051		0.746955		0.748414		0.98755	0.998638	-0.00281398	-0.0166006	0.0829567	0.161719	-0.420906	-2.29981	0.0436777	0.126121	-0.418092	-2.91001	35	21	21	104.64	127.22	2117500000	97	11	9	8	12	8	8	15	13	13	Q10567;C9J1E7	AP-1 complex subunit beta-1	AP1B1	sp|Q10567|AP1B1_HUMAN AP-1 complex subunit beta-1 OS=Homo sapiens OX=9606 GN=AP1B1 PE=1 SV=2;tr|C9J1E7|C9J1E7_HUMAN AP-1 complex subunit beta-1 (Fragment) OS=Homo sapiens OX=9606 GN=AP1B1 PE=1 SV=1	antigen processing and presentation;antigen processing and presentation of exogenous antigen;antigen processing and presentation of exogenous peptide antigen;antigen processing and presentation of exogenous peptide antigen via MHC class II;antigen processing and presentation of peptide antigen;antigen processing and presentation of peptide antigen via MHC class II;antigen processing and presentat…	binding;enzyme binding;kinase binding;protein binding;protein kinase binding;protein transporter activity;substrate-specific transporter activity;transporter activity
29.5684	29.3166	29.9864	29.5782	29.7129	30.1925	30.2156	29.9379	30.4442		1.15195		0.773061		0.671091		0.491831	1	0.204074	0.755809	0.192234	0.295224	-0.371346	-1.56677	0.0778961	0.178858	-0.575419	-2.35725	35	35	30	95.337	323.31	11967000000	332	31	32	34	33	30	36	49	42	45	Q12906	Interleukin enhancer-binding factor 3	ILF3	sp|Q12906|ILF3_HUMAN Interleukin enhancer-binding factor 3 OS=Homo sapiens OX=9606 GN=ILF3 PE=1 SV=3	biological regulation;biosynthetic process;cellular biosynthetic process;cellular macromolecule biosynthetic process;cellular macromolecule metabolic process;cellular metabolic process;cellular nitrogen compound metabolic process;cellular process;cellular protein metabolic process;defense response;defense response to virus;immune effector process;immune system process;macromolecule biosynthetic p…	binding;DNA binding;double-stranded RNA binding;nucleic acid binding;RNA binding
26.0832	25.8216	26.1411	25.7599	25.6337	26.1171	26.8322	26.6674	26.6747		0.883708	+	0.540432	+	0.61155	GPR30_NES;GPR30-E2_NES	0.365699	1	-0.178358	-1.01929	0.00453818	0.0263327	-0.887815	-5.74904	0.0031841	0.0253075	-0.709457	-6.33212	35	34	34	242.96	189.69	1008300000	172	14	19	19	13	12	17	25	27	26	Q5JSZ5	Protein PRRC2B	PRRC2B	sp|Q5JSZ5|PRC2B_HUMAN Protein PRRC2B OS=Homo sapiens OX=9606 GN=PRRC2B PE=1 SV=2
25.3671	25.4033	26.1891	25.6082	24.6874	25.7869	25.9635	25.8181	26.4887		0.816601		0.603208		0.738681		0.537141	1	-0.292296	-0.6742	0.140014	0.235223	-0.729273	-1.83744	0.264205	0.415028	-0.436977	-1.29758	35	35	1	316.05	194.31	673700000	135	9	10	12	16	6	14	23	18	27	Q6KC79	Nipped-B-like protein	NIPBL	sp|Q6KC79|NIPBL_HUMAN Nipped-B-like protein OS=Homo sapiens OX=9606 GN=NIPBL PE=1 SV=2	anatomical structure development;anatomical structure morphogenesis;appendage morphogenesis;biological regulation;brain development;cell cycle;cell cycle process;cell differentiation;cellular component organization;cellular component organization at cellular level;cellular component organization or biogenesis;cellular component organization or biogenesis at cellular level;cellular developmental p…	binding;chromatin binding;chromo shadow domain binding;enzyme binding;histone deacetylase binding;protein binding;protein C-terminus binding;protein domain specific binding;protein N-terminus binding
26.0517	25.9797	25.9806	26.0254	26.3745	26.136	26.3753	26.5258	26.2465		1.12867		0.868189		0.769215		0.173959	1	0.174622	1.65161	0.19417	0.297758	-0.20392	-1.55827	0.0108432	0.050858	-0.378541	-4.49752	35	33	33	155.6	183.91	893170000	147	15	9	16	16	14	18	19	22	18	Q6P158;H7C109	Putative ATP-dependent RNA helicase DHX57	DHX57	sp|Q6P158|DHX57_HUMAN Putative ATP-dependent RNA helicase DHX57 OS=Homo sapiens OX=9606 GN=DHX57 PE=1 SV=2;tr|H7C109|H7C109_HUMAN Putative ATP-dependent RNA helicase DHX57 (Fragment) OS=Homo sapiens OX=9606 GN=DHX57 PE=1 SV=1	cellular macromolecule metabolic process;cellular metabolic process;cellular nitrogen compound metabolic process;cellular process;macromolecule metabolic process;metabolic process;nitrogen compound metabolic process;nucleic acid metabolic process;nucleobase-containing compound metabolic process;primary metabolic process;RNA metabolic process;RNA processing	adenyl nucleotide binding;adenyl ribonucleotide binding;ATP binding;ATPase activity;ATPase activity, coupled;ATP-dependent helicase activity;ATP-dependent RNA helicase activity;binding;catalytic activity;cation binding;helicase activity;hydrolase activity;hydrolase activity, acting on acid anhydrides;hydrolase activity, acting on acid anhydrides, in phosphorus-containing anhydrides;ion binding;me…
28.0142	27.7244	28.0025	27.7766	27.8631	27.8345	27.4715	27.4309	27.7425		0.940201		1.21121		1.28824		0.415616	1	-0.0889587	-0.907191	0.0521209	0.118963	0.276446	2.73598	0.0549807	0.142329	0.365405	2.68433	35	35	35	104.11	195.17	2428800000	207	23	17	28	26	20	26	22	18	27	Q86XL3	Ankyrin repeat and LEM domain-containing protein 2	ANKLE2	sp|Q86XL3|ANKL2_HUMAN Ankyrin repeat and LEM domain-containing protein 2 OS=Homo sapiens OX=9606 GN=ANKLE2 PE=1 SV=4	biological regulation;cell cycle;cell cycle phase;cell cycle process;cell division;cellular component organization;cellular component organization at cellular level;cellular component organization or biogenesis;cellular component organization or biogenesis at cellular level;cellular membrane organization;cellular process;membrane organization;mitosis;mitotic cell cycle;mitotic nuclear envelope re…	binding;enzyme binding;enzyme regulator activity;phosphatase binding;phosphatase regulator activity;protein binding;protein phosphatase 2A binding;protein phosphatase binding;protein phosphatase regulator activity;protein phosphatase type 2A regulator activity
29.6519	29.7011	29.5436	29.7213	29.8801	29.4806	26.0022	26.4624	26.3872		1.04378	+	10.63	+	10.1842	GPR30_NES;GPR30-E2_NES	0.647124	1	0.0618134	0.494123	4.97187e-05	0	3.41008	18.5488	2.38057e-05	0	3.34826	22.3317	35	35	35	111.76	269.96	5306000000	247	37	36	33	38	36	34	8	14	11	Q8N766	ER membrane protein complex subunit 1	EMC1	sp|Q8N766|EMC1_HUMAN ER membrane protein complex subunit 1 OS=Homo sapiens OX=9606 GN=EMC1 PE=1 SV=1
26.5526	26.6753	27.0338	26.5078	26.4116	27.0583	26.9559	27.2352	27.4727		0.936486		0.677338		0.723276		0.721897	1	-0.0946712	-0.381988	0.0884957	0.168841	-0.562053	-2.24128	0.0876426	0.193499	-0.467382	-2.25003	35	35	15	229.48	323.31	1540200000	189	16	19	19	18	12	18	28	26	33	Q92576	PHD finger protein 3	PHF3	sp|Q92576|PHF3_HUMAN PHD finger protein 3 OS=Homo sapiens OX=9606 GN=PHF3 PE=1 SV=3	biosynthetic process;cellular biosynthetic process;cellular macromolecule biosynthetic process;cellular macromolecule metabolic process;cellular metabolic process;cellular nitrogen compound metabolic process;cellular process;developmental process;macromolecule biosynthetic process;macromolecule metabolic process;metabolic process;multicellular organismal development;multicellular organismal proce…	binding;cation binding;ion binding;metal ion binding;transition metal ion binding;zinc ion binding
33.5431	33.7783	33.334	33.6171	33.7505	33.095	33.012	32.6054	32.214		0.956431		1.83667		1.92034		0.800207	1	-0.0642675	-0.270434	0.0452449	0.107095	0.877096	2.8749	0.0233801	0.0838182	0.941363	3.56979	35	35	35	80.472	323.31	110780000000	821	95	94	89	99	99	94	92	87	72	Q96RQ3;E9PHF7;F5GYT8;E9PG35;G5E9X5	Methylcrotonoyl-CoA carboxylase subunit alpha, mitochondrial	MCCC1	sp|Q96RQ3|MCCA_HUMAN Methylcrotonoyl-CoA carboxylase subunit alpha, mitochondrial OS=Homo sapiens OX=9606 GN=MCCC1 PE=1 SV=3;tr|E9PHF7|E9PHF7_HUMAN Methylcrotonoyl-CoA carboxylase subunit alpha, mitochondrial OS=Homo sapiens OX=9606 GN=MCCC1 PE=1 SV=1;tr|F	amine catabolic process;amine metabolic process;biotin metabolic process;branched chain family amino acid catabolic process;branched chain family amino acid metabolic process;carboxylic acid catabolic process;carboxylic acid metabolic process;catabolic process;cellular amide metabolic process;cellular amine metabolic process;cellular amino acid catabolic process;cellular amino acid metabolic proc…	adenyl nucleotide binding;adenyl ribonucleotide binding;ATP binding;binding;biotin binding;biotin carboxylase activity;carboxylic acid binding;catalytic activity;cation binding;CoA carboxylase activity;ion binding;ligase activity;ligase activity, forming carbon-carbon bonds;ligase activity, forming carbon-nitrogen bonds;metal ion binding;methylcrotonoyl-CoA carboxylase activity;monocarboxylic aci…
28.3914	28.664	28.3391	28.5341	28.7114	28.3108	28.8521	29.131	28.694		1.0381		0.771871		0.743545		0.743075	1	0.0539411	0.351317	0.0962533	0.178299	-0.373568	-2.16588	0.0583213	0.147005	-0.427509	-2.62779	35	35	28	101.27	195.72	5223700000	289	33	29	24	33	28	33	36	40	33	Q9BXJ9;A0A0B4J1W3	N-alpha-acetyltransferase 15, NatA auxiliary subunit	NAA15	sp|Q9BXJ9|NAA15_HUMAN N-alpha-acetyltransferase 15, NatA auxiliary subunit OS=Homo sapiens OX=9606 GN=NAA15 PE=1 SV=1;tr|A0A0B4J1W3|A0A0B4J1W3_HUMAN N-alpha-acetyltransferase 15, NatA auxiliary subunit OS=Homo sapiens OX=9606 GN=NAA15 PE=1 SV=1	anatomical structure formation involved in morphogenesis;angiogenesis;biological regulation;biosynthetic process;cell differentiation;cellular biosynthetic process;cellular developmental process;cellular macromolecule biosynthetic process;cellular macromolecule metabolic process;cellular metabolic process;cellular nitrogen compound metabolic process;cellular process;cellular protein metabolic pro…	acetyltransferase activity;binding;catalytic activity;N-acetyltransferase activity;N-acyltransferase activity;ribonucleoprotein binding;ribosome binding;transferase activity;transferase activity, transferring acyl groups;transferase activity, transferring acyl groups other than amino-acyl groups
28.2068	27.7652	28.6433	28.455	28.2312	28.505	28.0422	27.5322	28.0823		1.14232		1.42554		1.24794		0.512035	1	0.191968	0.718764	0.0594883	0.128856	0.511511	2.60891	0.359783	0.515516	0.319544	1.03344	35	35	35	115.73	173.43	3210400000	244	29	26	25	28	26	30	29	25	26	Q9H0A0;A0A087WV29	N-acetyltransferase 10	NAT10	sp|Q9H0A0|NAT10_HUMAN RNA cytidine acetyltransferase OS=Homo sapiens OX=9606 GN=NAT10 PE=1 SV=2;tr|A0A087WV29|A0A087WV29_HUMAN RNA cytidine acetyltransferase OS=Homo sapiens OX=9606 GN=NAT10 PE=1 SV=1		acetyltransferase activity;adenyl nucleotide binding;adenyl ribonucleotide binding;ATP binding;binding;catalytic activity;N-acetyltransferase activity;N-acyltransferase activity;nucleotide binding;purine nucleotide binding;purine ribonucleoside triphosphate binding;purine ribonucleotide binding;ribonucleotide binding;transferase activity;transferase activity, transferring acyl groups;transferase …
27.2146	27.1895	26.9577	27.4234	27.393	26.881	27.4051	27.2089	26.5698		1.08062		1.12598		1.04197		0.595146	1	0.111862	0.57653	0.607412	0.754184	0.171177	0.556693	0.833914	0.913441	0.0593154	0.223752	35	35	35	136.31	172.35	1676600000	171	19	17	18	14	21	20	21	23	18	Q9HAV4	Exportin-5	XPO5	sp|Q9HAV4|XPO5_HUMAN Exportin-5 OS=Homo sapiens OX=9606 GN=XPO5 PE=1 SV=1	establishment of localization;establishment of localization in cell;establishment of protein localization;establishment of RNA localization;gene expression;intracellular protein transport;intracellular transport;macromolecule metabolic process;metabolic process;nuclear export;nuclear transport;nucleic acid transport;nucleobase-containing compound transport;nucleocytoplasmic transport;pre-miRNA ex…	binding;enzyme binding;GTPase binding;mRNA binding;nucleic acid binding;pre-miRNA binding;protein binding;protein transporter activity;Ran GTPase binding;Ras GTPase binding;RNA binding;small GTPase binding;substrate-specific transporter activity;transporter activity;tRNA binding
28.5428	28.5825	28.793	28.5062	28.8544	28.8087	28.4923	28.759	28.4591		1.0597		1.11184		1.0492		0.566296	1	0.0836589	0.62426	0.35016	0.475335	0.15295	1.0569	0.60225	0.755779	0.0692914	0.56501	35	35	35	109	245.36	4774000000	253	24	34	22	27	26	28	31	30	31	Q9Y2L1;G3V1J5;F2Z2C0	Exosome complex exonuclease RRP44	DIS3	sp|Q9Y2L1|RRP44_HUMAN Exosome complex exonuclease RRP44 OS=Homo sapiens OX=9606 GN=DIS3 PE=1 SV=2;tr|G3V1J5|G3V1J5_HUMAN Exosome complex exonuclease RRP44 OS=Homo sapiens OX=9606 GN=DIS3 PE=1 SV=1;tr|F2Z2C0|F2Z2C0_HUMAN Exosome complex exonuclease RRP44 OS	biological regulation;catabolic process;cellular catabolic process;cellular macromolecule catabolic process;cellular macromolecule metabolic process;cellular metabolic process;cellular nitrogen compound metabolic process;cellular process;CUT catabolic process;CUT metabolic process;exonucleolytic nuclear-transcribed mRNA catabolic process involved in deadenylation-dependent decay;gene expression;m…	3'-5' exonuclease activity;3'-5'-exoribonuclease activity;binding;catalytic activity;endonuclease activity;enzyme regulator activity;exonuclease activity;exonuclease activity, active with either ribo- or deoxyribonucleic acids and producing 5'-phosphomonoesters;exoribonuclease activity;exoribonuclease activity, producing 5'-phosphomonoesters;GTPase regulator activity;guanyl-nucleotide exchange fa…
24.8391	24.6716	25.283	24.7316	24.5992	25.0938	25.1257	25.4645	25.542		0.918266		0.673989		0.73398		0.628027	1	-0.123016	-0.523912	0.0435634	0.105585	-0.569204	-2.91263	0.115698	0.230887	-0.446187	-2.00316	35	31	20	194.31	184.37	437370000	116	8	9	11	12	10	11	19	18	18	Q9Y5S2	Serine/threonine-protein kinase MRCK beta	CDC42BPB	sp|Q9Y5S2|MRCKB_HUMAN Serine/threonine-protein kinase MRCK beta OS=Homo sapiens OX=9606 GN=CDC42BPB PE=1 SV=2	actin cytoskeleton organization;actin cytoskeleton reorganization;actin filament-based process;actomyosin structure organization;biological regulation;cell migration;cell motility;cellular component movement;cellular component organization;cellular component organization at cellular level;cellular component organization or biogenesis;cellular component organization or biogenesis at cellular level…	adenyl nucleotide binding;adenyl ribonucleotide binding;ATP binding;binding;catalytic activity;cation binding;ion binding;kinase activity;magnesium ion binding;metal ion binding;nucleotide binding;phosphotransferase activity, alcohol group as acceptor;protein kinase activity;protein serine/threonine kinase activity;purine nucleotide binding;purine ribonucleoside triphosphate binding;purine ribonu…
23.508	23.6103	23.2738	23.2107	23.5358	23.2933	25.3632	25.7756	25.3649		0.921829	+	0.224594	+	0.243639	GPR30_NES;GPR30-E2_NES	0.446966	1	-0.117428	-0.842441	0.00021459	0.004	-2.15461	-12.8018	0.000274769	0.00589247	-2.03718	-12.0185	34	34	34	312.1	102.6	301050000	82	5	4	6	4	5	6	14	20	18	A0A087X0P0;Q02224	Kinesin-like protein;Centromere-associated protein E	CENPE	tr|A0A087X0P0|A0A087X0P0_HUMAN Centromere-associated protein E OS=Homo sapiens OX=9606 GN=CENPE PE=1 SV=1;sp|Q02224|CENPE_HUMAN Centromere-associated protein E OS=Homo sapiens OX=9606 GN=CENPE PE=1 SV=2	antigen processing and presentation;antigen processing and presentation of exogenous antigen;antigen processing and presentation of exogenous peptide antigen;antigen processing and presentation of exogenous peptide antigen via MHC class II;antigen processing and presentation of peptide antigen;antigen processing and presentation of peptide antigen via MHC class II;antigen processing and presentat…	adenyl nucleotide binding;adenyl ribonucleotide binding;ATP binding;ATPase activity;binding;catalytic activity;hydrolase activity;hydrolase activity, acting on acid anhydrides;hydrolase activity, acting on acid anhydrides, in phosphorus-containing anhydrides;kinetochore binding;microtubule motor activity;motor activity;nucleoside-triphosphatase activity;nucleotide binding;purine nucleotide bindin…
24.9005	24.3447	25.7299	24.6349	24.0065	25.1795	26.2971	25.9455	26.4915		0.765934	+	0.321363		0.41957	GPR30-E2_NES	0.505201	1	-0.384708	-0.731172	0.0119592	0.044736	-1.63772	-4.37095	0.0443974	0.127411	-1.25301	-2.89371	34	3	3	102.29	30.151	649610000	22	2	2	2	2	2	2	3	3	4	A0A0A0MRA8;Q9Y2J2;A0A0A0MSA4;A0A1B0GTF8	Band 4.1-like protein 3;Band 4.1-like protein 3, N-terminally processed	EPB41L3	tr|A0A0A0MRA8|A0A0A0MRA8_HUMAN Band 4.1-like protein 3 OS=Homo sapiens OX=9606 GN=EPB41L3 PE=1 SV=1;sp|Q9Y2J2|E41L3_HUMAN Band 4.1-like protein 3 OS=Homo sapiens OX=9606 GN=EPB41L3 PE=1 SV=2;tr|A0A0A0MSA4|A0A0A0MSA4_HUMAN Band 4.1-like protein 3 OS=Homo sa	actin cytoskeleton organization;actin filament-based process;anatomical structure formation involved in morphogenesis;anatomical structure morphogenesis;apoptosis;biological regulation;cell death;cell junction assembly;cell junction organization;cell part morphogenesis;cell projection morphogenesis;cell projection organization;cell-cell junction assembly;cell-cell junction organization;cellular c…	structural constituent of cytoskeleton;structural molecule activity
32.7033	32.2096	32.5859	32.5261	32.4394	32.5513	29.8568	29.7502	29.9702		1.0042	+	6.26167	+	6.23549	GPR30_NES;GPR30-E2_NES	0.970328	1	0.00604375	0.0395757	3.26752e-06	0	2.64655	36.7662	8.26847e-05	0.00225	2.6405	16.311	34	34	34	67.567	323.31	40234000000	375	47	40	51	52	49	57	24	23	32	P27824;A0A7P0TB65;A0A7P0T840;A0A7P0TAE9;A0A7P0T937;A0A7P0Z484;A0A7P0T8G1;A0A7P0T9L0;D6RGY2;A0A7P0Z4D6;A0A7P0TAR9	Calnexin	CANX	sp|P27824|CALX_HUMAN Calnexin OS=Homo sapiens OX=9606 GN=CANX PE=1 SV=2;tr|A0A7P0TB65|A0A7P0TB65_HUMAN Calnexin OS=Homo sapiens OX=9606 GN=CANX PE=1 SV=1;tr|A0A7P0T840|A0A7P0T840_HUMAN Calnexin OS=Homo sapiens OX=9606 GN=CANX PE=1 SV=1;tr|A0A7P0TAE9|A0A7P0	aging;antigen processing and presentation;antigen processing and presentation of exogenous antigen;antigen processing and presentation of exogenous peptide antigen;antigen processing and presentation of exogenous peptide antigen via MHC class II;antigen processing and presentation of peptide antigen;antigen processing and presentation of peptide antigen via MHC class I;antigen processing and pres…	binding;calcium ion binding;carbohydrate binding;cation binding;ion binding;metal ion binding
28.8016	28.4496	28.6564	28.6476	28.4278	28.4631	29.737	29.1756	29.7331		0.918275	+	0.487765		0.531175	GPR30-E2_NES	0.373128	1	-0.123002	-1.0018	0.00643973	0.0308836	-1.03574	-5.21722	0.0127155	0.0550795	-0.91274	-4.29304	34	34	34	104.85	323.31	6599600000	236	25	21	23	25	22	23	30	31	36	C9JZR2;H0YC95;O60716;A0A669KB05;A0A669KB62	Catenin delta-1	CTNND1	tr|C9JZR2|C9JZR2_HUMAN Catenin delta-1 OS=Homo sapiens OX=9606 GN=CTNND1 PE=1 SV=2;tr|H0YC95|H0YC95_HUMAN Catenin delta-1 OS=Homo sapiens OX=9606 GN=CTNND1 PE=1 SV=2;sp|O60716|CTND1_HUMAN Catenin delta-1 OS=Homo sapiens OX=9606 GN=CTNND1 PE=1 SV=1;tr|A0A66	adherens junction organization;anatomical structure development;biological adhesion;biological regulation;biosynthetic process;brain development;cell adhesion;cell junction assembly;cell junction organization;cell surface receptor linked signaling pathway;cell-cell adhesion;cell-cell junction organization;cellular biosynthetic process;cellular component assembly;cellular component assembly at cel…	binding;cadherin binding;cell adhesion molecule binding;protein binding;receptor binding
27.9451	28.1374	28.3359	27.7269	27.8805	28.2286	29.3657	29.485	29.3382		0.874085	+	0.365769	+	0.41846	GPR30_NES;GPR30-E2_NES	0.35651	1	-0.194155	-1.04136	0.000727318	0.0111753	-1.45099	-9.35429	0.000492948	0.0142581	-1.25684	-10.3441	34	34	24	69.371	174.07	5778000000	238	23	24	20	24	21	18	29	38	41	E7EQR4;P15311	Ezrin	EZR	tr|E7EQR4|E7EQR4_HUMAN Ezrin OS=Homo sapiens OX=9606 GN=EZR PE=1 SV=3;sp|P15311|EZRI_HUMAN Ezrin OS=Homo sapiens OX=9606 GN=EZR PE=1 SV=4	actin cytoskeleton organization;actin cytoskeleton reorganization;actin filament bundle assembly;actin filament organization;actin filament-based process;anatomical structure development;axon guidance;biological adhesion;biological regulation;cell adhesion;cell development;cell projection assembly;cell projection organization;cell-cell adhesion;cellular component assembly;cellular component assem…	actin binding;actin filament binding;binding;cell adhesion molecule binding;cytoskeletal protein binding;protein binding
27.6254	27.6722	27.2752	27.5511	27.4974	27.3043	27.7351	28.0745	27.636		0.950423		0.776853		0.817376		0.64172	1	-0.0733585	-0.5025	0.0752218	0.149423	-0.364286	-2.38934	0.186233	0.323204	-0.290928	-1.59367	34	34	34	121.32	160.03	2449600000	203	22	18	19	21	21	26	24	25	27	O00203	AP-3 complex subunit beta-1	AP3B1	sp|O00203|AP3B1_HUMAN AP-3 complex subunit beta-1 OS=Homo sapiens OX=9606 GN=AP3B1 PE=1 SV=3	anterograde axon cargo transport;anterograde synaptic vesicle transport;antigen processing and presentation;antigen processing and presentation of exogenous antigen;antigen processing and presentation of lipid antigen via MHC class Ib;antigen processing and presentation via MHC class Ib;antigen processing and presentation, exogenous lipid antigen via MHC class Ib;axon cargo transport;biological r…	binding;enzyme binding;GTP-dependent protein binding;phosphatase binding;protein binding;protein phosphatase binding
27.7682	27.6703	27.6971	27.9931	27.895	27.9156	28.1063	28.0912	27.9474		1.16693		0.924204	+	0.791997	GPR30_NES	0.00595716	1	0.222715	5.33202	0.125189	0.215234	-0.113717	-1.93434	0.00452276	0.0294888	-0.336433	-5.75442	34	34	34	121	235.92	2730400000	190	23	18	20	20	18	23	23	22	23	O00267	Transcription elongation factor SPT5	SUPT5H	sp|O00267|SPT5H_HUMAN Transcription elongation factor SPT5 OS=Homo sapiens OX=9606 GN=SUPT5H PE=1 SV=1	biological regulation;biosynthetic process;cell cycle;cellular biosynthetic process;cellular component organization;cellular component organization at cellular level;cellular component organization or biogenesis;cellular component organization or biogenesis at cellular level;cellular macromolecule biosynthetic process;cellular macromolecule metabolic process;cellular metabolic process;cellular ni…	binding;chromatin binding;enzyme binding;protein binding;protein dimerization activity;protein heterodimerization activity
27.0341	27.6248	27.0963	26.9114	27.0245	26.91	28.1969	28.4153	28.0691		0.8105	+	0.412243	+	0.508628	GPR30_NES;GPR30-E2_NES	0.188097	1	-0.303116	-1.58522	0.000291187	0.0057479	-1.27843	-11.8414	0.0101795	0.0493806	-0.975316	-4.58052	34	34	33	115.28	226.61	2678600000	177	17	13	16	17	13	14	25	31	31	O14974;F8VZN8	Protein phosphatase 1 regulatory subunit 12A	PPP1R12A	sp|O14974|MYPT1_HUMAN Protein phosphatase 1 regulatory subunit 12A OS=Homo sapiens OX=9606 GN=PPP1R12A PE=1 SV=1;tr|F8VZN8|F8VZN8_HUMAN Protein phosphatase 1 regulatory subunit 12A (Fragment) OS=Homo sapiens OX=9606 GN=PPP1R12A PE=1 SV=1	biological regulation;cell cycle;cell cycle phase;cell cycle process;cellular component organization;cellular component organization at cellular level;cellular component organization or biogenesis;cellular component organization or biogenesis at cellular level;cellular macromolecule metabolic process;cellular metabolic process;cellular process;cellular protein metabolic process;cellular response …	14-3-3 protein binding;binding;enzyme binding;enzyme inhibitor activity;enzyme regulator activity;kinase binding;molecular transducer activity;phosphatase regulator activity;protein binding;protein kinase binding;signal transducer activity
30.8279	31.187	30.8206	30.8472	31.1777	31.1057	31.1854	31.2001	31.0709		1.07056		0.92748		0.866351		0.565225	1	0.0983645	0.626063	0.372716	0.501859	-0.108611	-1.00276	0.180166	0.315699	-0.206976	-1.6218	34	34	3	57.936	323.31	25361000000	313	29	29	35	36	31	34	44	36	39	P14618;B4DNK4	Pyruvate kinase PKM;Pyruvate kinase	PKM	sp|P14618|KPYM_HUMAN Pyruvate kinase PKM OS=Homo sapiens OX=9606 GN=PKM PE=1 SV=4;tr|B4DNK4|B4DNK4_HUMAN Pyruvate kinase OS=Homo sapiens OX=9606 GN=PKM PE=1 SV=1	alcohol catabolic process;alcohol metabolic process;carbohydrate catabolic process;carbohydrate metabolic process;catabolic process;cell death;cellular carbohydrate catabolic process;cellular carbohydrate metabolic process;cellular metabolic process;cellular process;death;generation of precursor metabolites and energy;glucose catabolic process;glucose metabolic process;glycolysis;hexose catabolic…	adenyl nucleotide binding;adenyl ribonucleotide binding;alkali metal ion binding;antigen binding;ATP binding;binding;catalytic activity;cation binding;ion binding;kinase activity;magnesium ion binding;metal ion binding;MHC class II protein complex binding;MHC protein complex binding;nucleotide binding;phosphotransferase activity, alcohol group as acceptor;potassium ion binding;purine nucleotide b…
28.6833	28.7686	28.8635	28.7487	28.6782	28.5675	28.8755	28.6845	28.5168		0.928515		0.981127		1.05666		0.222138	1	-0.107002	-1.44436	0.824732	0.905161	-0.0274887	-0.236403	0.530546	0.691314	0.0795135	0.685757	34	34	34	90.98	236.72	4823100000	250	28	27	26	29	24	28	31	28	29	P25205;J3KQ69;A0A499FHX9	DNA replication licensing factor MCM3	MCM3	sp|P25205|MCM3_HUMAN DNA replication licensing factor MCM3 OS=Homo sapiens OX=9606 GN=MCM3 PE=1 SV=3;tr|J3KQ69|J3KQ69_HUMAN DNA replication licensing factor MCM3 OS=Homo sapiens OX=9606 GN=MCM3 PE=1 SV=3;tr|A0A499FHX9|A0A499FHX9_HUMAN DNA replication licen	biosynthetic process;cell cycle;cell cycle process;cellular biosynthetic process;cellular macromolecule biosynthetic process;cellular macromolecule metabolic process;cellular metabolic process;cellular nitrogen compound metabolic process;cellular process;DNA metabolic process;DNA replication;DNA strand elongation;DNA strand elongation involved in DNA replication;DNA-dependent DNA replication init…	adenyl nucleotide binding;adenyl ribonucleotide binding;ATP binding;binding;catalytic activity;DNA binding;DNA helicase activity;helicase activity;hydrolase activity;hydrolase activity, acting on acid anhydrides;hydrolase activity, acting on acid anhydrides, in phosphorus-containing anhydrides;nucleic acid binding;nucleoside-triphosphatase activity;nucleotide binding;purine nucleotide binding;pur…
31.0441	31.5329	31.3975	31.0404	31.0955	31.3908	27.1512	26.7165	26.9816		0.901693	+	18.7106	+	20.7506	GPR30_NES;GPR30-E2_NES	0.457729	1	-0.149291	-0.821057	1.4433e-05	0	4.22579	25.3264	2.24083e-05	0	4.37508	22.6742	34	34	29	56.782	323.31	15465000000	283	39	42	43	41	40	47	10	11	10	P30101	Protein disulfide-isomerase A3	PDIA3	sp|P30101|PDIA3_HUMAN Protein disulfide-isomerase A3 OS=Homo sapiens OX=9606 GN=PDIA3 PE=1 SV=4	antigen processing and presentation;antigen processing and presentation of exogenous antigen;antigen processing and presentation of exogenous peptide antigen;antigen processing and presentation of exogenous peptide antigen via MHC class I;antigen processing and presentation of exogenous peptide antigen via MHC class I, TAP-dependent;antigen processing and presentation of peptide antigen;antigen p…	catalytic activity;cysteine-type endopeptidase activity;cysteine-type peptidase activity;disulfide oxidoreductase activity;endopeptidase activity;hydrolase activity;hydrolase activity, acting on ester bonds;intramolecular oxidoreductase activity;intramolecular oxidoreductase activity, interconverting keto- and enol-groups;intramolecular oxidoreductase activity, transposing S-S bonds;isomerase act…
27.3336	27.3778	27.7904	27.3454	27.0461	27.5975	27.6589	27.6585	28.1552		0.888277		0.709792		0.799067		0.472573	1	-0.170919	-0.792208	0.0977182	0.180258	-0.494531	-2.1524	0.215852	0.359862	-0.323612	-1.46865	34	34	34	153.94	228.29	2189400000	148	13	12	20	12	10	19	20	19	23	P49790	Nuclear pore complex protein Nup153	NUP153	sp|P49790|NU153_HUMAN Nuclear pore complex protein Nup153 OS=Homo sapiens OX=9606 GN=NUP153 PE=1 SV=2	biological regulation;biosynthetic process;carbohydrate metabolic process;carbohydrate transport;cell cycle;cell cycle process;cell surface receptor linked signaling pathway;cellular biosynthetic process;cellular component assembly;cellular component assembly at cellular level;cellular component disassembly;cellular component disassembly at cellular level;cellular component organization;cellular …	binding;cation binding;DNA binding;identical protein binding;ion binding;metal ion binding;nucleic acid binding;nucleocytoplasmic transporter activity;protein anchor;protein binding;structural constituent of nuclear pore;structural molecule activity;transition metal ion binding;transporter activity;zinc ion binding
27.0712	27.2342	26.9221	27.2176	27.3719	26.9632	26.9351	27.1237	26.7874		1.07807		1.17735		1.0921		0.508118	1	0.108444	0.725861	0.200496	0.307052	0.235543	1.53111	0.392168	0.549066	0.127099	0.958324	34	34	34	126.97	76.211	1594400000	161	17	19	15	20	15	18	18	18	21	Q16531;A0A7P0TAK7;A0A7P0Z4B9;A0A7P0T965;A0A7P0T870;A0A7P0Z3Z5;F5GY55;A0A7P0TB30	DNA damage-binding protein 1	DDB1	sp|Q16531|DDB1_HUMAN DNA damage-binding protein 1 OS=Homo sapiens OX=9606 GN=DDB1 PE=1 SV=1;tr|A0A7P0TAK7|A0A7P0TAK7_HUMAN DNA damage-binding protein 1 OS=Homo sapiens OX=9606 GN=DDB1 PE=1 SV=1;tr|A0A7P0Z4B9|A0A7P0Z4B9_HUMAN DNA damage-binding protein 1 OS	biological regulation;biosynthetic process;catabolic process;cell surface receptor linked signaling pathway;cellular biosynthetic process;cellular catabolic process;cellular component organization;cellular component organization at cellular level;cellular component organization or biogenesis;cellular component organization or biogenesis at cellular level;cellular macromolecule biosynthetic proces…	binding;damaged DNA binding;DNA binding;nucleic acid binding
29.0825	29.1842	29.006	29.1834	29.0911	28.7474	29.0611	29.3534	28.9183		0.943728		0.9307		0.986195		0.588722	1	-0.0835565	-0.587024	0.604114	0.751373	-0.103612	-0.562002	0.891523	0.943596	-0.0200551	-0.145272	34	34	34	96.053	323.31	6640100000	258	29	27	26	24	29	26	32	37	28	Q5STZ8;Q8NE71;H0YGW7	ATP-binding cassette sub-family F member 1	ABCF1	tr|Q5STZ8|Q5STZ8_HUMAN ATP-binding cassette sub-family F member 1 OS=Homo sapiens OX=9606 GN=ABCF1 PE=1 SV=10;sp|Q8NE71|ABCF1_HUMAN ATP-binding cassette sub-family F member 1 OS=Homo sapiens OX=9606 GN=ABCF1 PE=1 SV=2;tr|H0YGW7|H0YGW7_HUMAN ATP-binding cas	biological regulation;biosynthetic process;cellular biosynthetic process;cellular macromolecule biosynthetic process;cellular macromolecule metabolic process;cellular metabolic process;cellular process;cellular protein metabolic process;defense response;establishment of localization;inflammatory response;macromolecule biosynthetic process;macromolecule metabolic process;metabolic process;positive…	adenyl nucleotide binding;adenyl ribonucleotide binding;ATP binding;ATPase activity;binding;catalytic activity;hydrolase activity;hydrolase activity, acting on acid anhydrides;hydrolase activity, acting on acid anhydrides, in phosphorus-containing anhydrides;nucleic acid binding;nucleoside-triphosphatase activity;nucleotide binding;purine nucleotide binding;purine ribonucleoside triphosphate bind…
23.2422	24.8486	23.8903	23.2738	24.0184	23.4987	25.3905	26.0008	25.1687		0.759588	+	0.2637		0.347162	GPR30-E2_NES	0.484925	1	-0.396711	-0.768735	0.00443629	0.0263755	-1.92303	-5.78501	0.0447199	0.127951	-1.52632	-2.8865	34	34	34	350.93	156.11	360590000	90	2	12	8	2	5	4	18	22	17	Q5VT06;H0Y7F7	Centrosome-associated protein 350	CEP350	sp|Q5VT06|CE350_HUMAN Centrosome-associated protein 350 OS=Homo sapiens OX=9606 GN=CEP350 PE=1 SV=1;tr|H0Y7F7|H0Y7F7_HUMAN Centrosome-associated protein 350 (Fragment) OS=Homo sapiens OX=9606 GN=CEP350 PE=1 SV=1	biological regulation;cellular component organization;cellular component organization at cellular level;cellular component organization or biogenesis;cellular component organization or biogenesis at cellular level;cellular process;cytoskeleton organization;maintenance of location;maintenance of location in cell;maintenance of protein location;maintenance of protein location in cell;microtubule an…
25.4889	25.7421	25.7765	25.0199	25.0168	25.5555	26.4555	27.1591	27.1326		0.721099	+	0.303896	+	0.421435	GPR30_NES;GPR30-E2_NES	0.078468	1	-0.471731	-2.35055	0.00415057	0.0247916	-1.71835	-5.89154	0.0072945	0.0397754	-1.24662	-5.03757	34	34	27	128.47	118.11	960630000	121	10	8	10	8	7	9	22	25	22	X6RLX0;Q8IUD2;G8JLD3;X6RM00	ELKS/Rab6-interacting/CAST family member 1	ERC1	tr|X6RLX0|X6RLX0_HUMAN ELKS/Rab6-interacting/CAST family member 1 OS=Homo sapiens OX=9606 GN=ERC1 PE=1 SV=1;sp|Q8IUD2|RB6I2_HUMAN ELKS/Rab6-interacting/CAST family member 1 OS=Homo sapiens OX=9606 GN=ERC1 PE=1 SV=1;tr|G8JLD3|G8JLD3_HUMAN ELKS/Rab6-interact	biological regulation;cellular macromolecule metabolic process;cellular metabolic process;cellular process;cellular protein metabolic process;developmental process;endosome transport;establishment of localization;establishment of localization in cell;establishment of protein localization;I-kappaB phosphorylation;intracellular transport;macromolecule metabolic process;macromolecule modification;me…	binding;enzyme binding;GTPase binding;leucine zipper domain binding;LRR domain binding;PDZ domain binding;protein binding;protein domain specific binding;Rab GTPase binding;Ras GTPase binding;small GTPase binding
28.7499	28.6636	28.8857	28.2203	27.9982	28.6793	29.0398	29.0802	29.2839		0.723411		0.560442		0.774721		0.0909216	1	-0.467113	-2.21694	0.0175692	0.0571277	-0.835364	-3.89814	0.0207779	0.0773872	-0.368251	-3.70316	34	34	2	113.37	323.31	5844500000	283	25	21	30	27	26	30	38	38	48	Q8WWM7	Ataxin-2-like protein	ATXN2L	sp|Q8WWM7|ATX2L_HUMAN Ataxin-2-like protein OS=Homo sapiens OX=9606 GN=ATXN2L PE=1 SV=2	biological regulation;cellular component assembly;cellular component assembly at cellular level;cellular component organization;cellular component organization at cellular level;cellular component organization or biogenesis;cellular component organization or biogenesis at cellular level;cellular macromolecular complex assembly;cellular macromolecular complex subunit organization;cellular process;…
25.1616	25.0647	25.1504	25.0782	24.9536	25.2329	25.3321	25.921	25.8983		0.974458		0.646667		0.663617		0.687943	1	-0.0373274	-0.4321	0.039528	0.100006	-0.628906	-3.01057	0.0386734	0.115524	-0.591578	-3.03282	34	34	32	410.5	154.6	515720000	129	9	9	13	12	7	11	23	26	19	Q96Q15;J3KRA9	Serine/threonine-protein kinase SMG1	SMG1	sp|Q96Q15|SMG1_HUMAN Serine/threonine-protein kinase SMG1 OS=Homo sapiens OX=9606 GN=SMG1 PE=1 SV=3;tr|J3KRA9|J3KRA9_HUMAN Non-specific serine/threonine protein kinase (Fragment) OS=Homo sapiens OX=9606 GN=SMG1 PE=1 SV=1	catabolic process;cellular catabolic process;cellular lipid metabolic process;cellular macromolecule catabolic process;cellular macromolecule metabolic process;cellular metabolic process;cellular nitrogen compound metabolic process;cellular process;cellular protein metabolic process;cellular response to stimulus;cellular response to stress;DNA metabolic process;DNA recombination;DNA repair;double…	adenyl nucleotide binding;adenyl ribonucleotide binding;ATP binding;binding;catalytic activity;cation binding;ion binding;kinase activity;metal ion binding;nucleotide binding;phosphotransferase activity, alcohol group as acceptor;protein binding;protein dimerization activity;protein kinase activity;protein serine/threonine kinase activity;purine nucleotide binding;purine ribonucleoside triphospha…
28.0158	27.7802	28.352	27.8303	27.3909	27.9088	28.1836	28.0846	28.1703		0.790398		0.739101		0.9351		0.216228	1	-0.339349	-1.46717	0.0565144	0.126507	-0.436157	-2.65789	0.597013	0.75079	-0.0968075	-0.573494	34	34	33	152.45	316.82	3058100000	233	28	21	23	25	17	32	30	24	33	Q9P2E9;A0A087WVV2;F8W7S5	Ribosome-binding protein 1	RRBP1	sp|Q9P2E9|RRBP1_HUMAN Ribosome-binding protein 1 OS=Homo sapiens OX=9606 GN=RRBP1 PE=1 SV=5;tr|A0A087WVV2|A0A087WVV2_HUMAN Ribosome-binding protein 1 OS=Homo sapiens OX=9606 GN=RRBP1 PE=1 SV=1;tr|F8W7S5|F8W7S5_HUMAN Ribosome-binding protein 1 OS=Homo sapie	biosynthetic process;cell differentiation;cellular biosynthetic process;cellular developmental process;cellular macromolecule biosynthetic process;cellular macromolecule metabolic process;cellular metabolic process;cellular process;cellular protein metabolic process;developmental process;establishment of localization;establishment of protein localization;macromolecule biosynthetic process;macromo…	receptor activity
27.4344	27.5082	27.4809	27.573	27.922	27.8653	27.7386	27.4	27.5983		1.24163		1.15491		0.930153		0.0472503	1	0.312236	2.83197	0.228014	0.337549	0.207776	1.42228	0.357562	0.512821	-0.10446	-1.03881	34	34	34	106.1	181.97	2259600000	196	21	20	17	25	23	20	25	20	25	Q9UNX4	WD repeat-containing protein 3	WDR3	sp|Q9UNX4|WDR3_HUMAN WD repeat-containing protein 3 OS=Homo sapiens OX=9606 GN=WDR3 PE=1 SV=1	cellular macromolecule metabolic process;cellular metabolic process;cellular nitrogen compound metabolic process;cellular process;macromolecule metabolic process;maturation of SSU-rRNA;maturation of SSU-rRNA from tricistronic rRNA transcript (SSU-rRNA, 5.8S rRNA, LSU-rRNA);metabolic process;ncRNA metabolic process;ncRNA processing;nitrogen compound metabolic process;nucleic acid metabolic process…	binding;nucleic acid binding;RNA binding;snoRNA binding
27.0666	27.069	27.2334	27.0713	27.0139	27.1812	26.774	26.6	26.6303		0.976584	+	1.33856	+	1.37065	GPR30_NES;GPR30-E2_NES	0.667608	1	-0.0341835	-0.462734	0.00443732	0.0263218	0.420682	5.78464	0.00411088	0.0280577	0.454865	5.90705	34	34	34	129.59	145.96	1373200000	208	26	19	21	28	24	22	22	23	23	Q9UNY4	Transcription termination factor 2	TTF2	sp|Q9UNY4|TTF2_HUMAN Transcription termination factor 2 OS=Homo sapiens OX=9606 GN=TTF2 PE=1 SV=2	biological regulation;biosynthetic process;cellular biosynthetic process;cellular macromolecule metabolic process;cellular metabolic process;cellular nitrogen compound metabolic process;cellular process;macromolecule metabolic process;metabolic process;mRNA metabolic process;mRNA processing;nitrogen compound metabolic process;nucleic acid metabolic process;nucleobase-containing compound metabolic…	adenyl nucleotide binding;adenyl ribonucleotide binding;ATP binding;ATPase activity;ATPase activity, coupled;ATP-dependent helicase activity;binding;catalytic activity;cation binding;DNA binding;DNA-dependent ATPase activity;helicase activity;hydrolase activity;hydrolase activity, acting on acid anhydrides;hydrolase activity, acting on acid anhydrides, in phosphorus-containing anhydrides;ion bind…
27.6155	27.7674	27.6834	27.6414	27.7977	27.7683	28.2661	28.4663	28.1236		1.03313	+	0.683243	+	0.661336	GPR30_NES;GPR30-E2_NES	0.50978	1	0.0470149	0.722844	0.00759593	0.0356025	-0.54953	-4.98026	0.00536358	0.0317759	-0.596545	-5.4899	33	33	33	125	186.09	3089900000	243	24	25	23	25	25	23	34	32	32	A0A087X295;Q9NNW5;E9PDU5;E9PBK6	WD repeat-containing protein 6	WDR6	tr|A0A087X295|A0A087X295_HUMAN WD repeat-containing protein 6 OS=Homo sapiens OX=9606 GN=WDR6 PE=1 SV=1;sp|Q9NNW5|WDR6_HUMAN WD repeat-containing protein 6 OS=Homo sapiens OX=9606 GN=WDR6 PE=1 SV=1;tr|E9PDU5|E9PDU5_HUMAN WD repeat-containing protein 6 OS=H	biological regulation;cell cycle arrest;cell cycle process;cellular process;negative regulation of autophagy;negative regulation of biological process;negative regulation of catabolic process;negative regulation of cell cycle;negative regulation of cell proliferation;negative regulation of cellular catabolic process;negative regulation of cellular metabolic process;negative regulation of cellular…
27.9924	27.8193	28.2803	28.177	27.92	28.2455	28.4173	28.075	28.4297		1.05963		0.874699		0.825474		0.643094	1	0.0835641	0.500366	0.274665	0.389618	-0.193141	-1.26464	0.194455	0.332604	-0.276705	-1.55703	33	33	1	117.46	225.94	3534900000	234	23	24	28	29	22	23	29	28	28	A0A0C4DG89		DDX46	tr|A0A0C4DG89|A0A0C4DG89_HUMAN RNA helicase OS=Homo sapiens OX=9606 GN=DDX46 PE=1 SV=1		adenyl nucleotide binding;adenyl ribonucleotide binding;ATP binding;binding;catalytic activity;helicase activity;hydrolase activity;hydrolase activity, acting on acid anhydrides;hydrolase activity, acting on acid anhydrides, in phosphorus-containing anhydrides;nucleic acid binding;nucleoside-triphosphatase activity;nucleotide binding;purine nucleotide binding;purine ribonucleoside triphosphate bi…
27.6701	27.8006	27.6533	27.6784	27.5054	27.7116	28.1947	28.3031	28.379		0.948527	+	0.632663	+	0.666996	GPR30_NES;GPR30-E2_NES	0.389664	1	-0.0762393	-0.963938	0.00137245	0.0136377	-0.66049	-7.92456	0.00118314	0.0179902	-0.584251	-8.23961	33	33	33	212.48	296.49	2998100000	215	23	20	24	22	18	24	28	28	28	A0A494C1F2;P35658;A0A0A0MSW3;A0A494BZU9	Nuclear pore complex protein Nup214	NUP214	tr|A0A494C1F2|A0A494C1F2_HUMAN Nuclear pore complex protein Nup214 OS=Homo sapiens OX=9606 GN=NUP214 PE=1 SV=1;sp|P35658|NU214_HUMAN Nuclear pore complex protein Nup214 OS=Homo sapiens OX=9606 GN=NUP214 PE=1 SV=2;tr|A0A0A0MSW3|A0A0A0MSW3_HUMAN Nuclear pore	biological regulation;biosynthetic process;carbohydrate metabolic process;carbohydrate transport;cell cycle;cell cycle process;cell surface receptor linked signaling pathway;cellular biosynthetic process;cellular component disassembly;cellular component disassembly at cellular level;cellular component organization;cellular component organization at cellular level;cellular component organization o…	nucleocytoplasmic transporter activity;transporter activity
27.0387	26.7862	27.0807	27.0114	26.9435	27.2169	27.1528	27.2007	27.1799		1.06341		0.919843		0.864994		0.511869	1	0.0886974	0.719064	0.221677	0.332003	-0.120541	-1.44612	0.0877026	0.193344	-0.209238	-2.24941	33	33	33	117.97	153.03	1610300000	168	14	20	17	20	16	13	23	23	22	A0AVT1	Ubiquitin-like modifier-activating enzyme 6	UBA6	sp|A0AVT1|UBA6_HUMAN Ubiquitin-like modifier-activating enzyme 6 OS=Homo sapiens OX=9606 GN=UBA6 PE=1 SV=1	catabolic process;cellular catabolic process;cellular macromolecule catabolic process;cellular macromolecule metabolic process;cellular metabolic process;cellular process;cellular protein metabolic process;macromolecule catabolic process;macromolecule metabolic process;macromolecule modification;metabolic process;modification-dependent macromolecule catabolic process;modification-dependent protei…	adenyl nucleotide binding;adenyl ribonucleotide binding;ATP binding;binding;catalytic activity;FAT10 activating enzyme activity;nucleotide binding;purine nucleotide binding;purine ribonucleoside triphosphate binding;purine ribonucleotide binding;ribonucleotide binding;small protein activating enzyme activity
27.9826	27.581	27.6992	27.7391	27.9517	27.9396	27.7392	27.4173	27.687		1.08867		1.1994		1.10172		0.423585	1	0.122562	0.890361	0.096498	0.178615	0.262316	2.16361	0.41928	0.58089	0.139753	0.899421	33	33	33	82.091	92.775	2436200000	150	16	16	22	14	12	17	14	17	22	I3L0N3;P46459	Vesicle-fusing ATPase	NSF	tr|I3L0N3|I3L0N3_HUMAN Vesicle-fusing ATPase OS=Homo sapiens OX=9606 GN=NSF PE=1 SV=1;sp|P46459|NSF_HUMAN Vesicle-fusing ATPase OS=Homo sapiens OX=9606 GN=NSF PE=1 SV=3	ATP metabolic process;biological regulation;cation transport;cell communication;cell-cell signaling;cellular component organization;cellular component organization or biogenesis;cellular membrane fusion;cellular membrane organization;cellular metabolic process;cellular nitrogen compound metabolic process;cellular process;establishment of localization;establishment of localization in cell;establis…	adenyl nucleotide binding;adenyl ribonucleotide binding;ATP binding;ATPase activity;ATPase activity, coupled;binding;catalytic activity;cation binding;enzyme binding;GTPase binding;hydrolase activity;hydrolase activity, acting on acid anhydrides;hydrolase activity, acting on acid anhydrides, in phosphorus-containing anhydrides;ion binding;kinase binding;metal ion binding;nucleoside-triphosphatase…
26.1447	26.0692	25.934	26.2685	26.1701	26.0496	26.1416	26.3134	26.1188		1.08177		0.980379		0.906276		0.268678	1	0.113389	1.28334	0.762101	0.865699	-0.0285886	-0.324101	0.178135	0.313315	-0.141977	-1.63143	33	33	33	219.05	219.91	834270000	156	16	13	14	17	11	21	22	21	21	J3QS41;P42694	Probable helicase with zinc finger domain	HELZ	tr|J3QS41|J3QS41_HUMAN Probable helicase with zinc finger domain OS=Homo sapiens OX=9606 GN=HELZ PE=1 SV=1;sp|P42694|HELZ_HUMAN Probable helicase with zinc finger domain OS=Homo sapiens OX=9606 GN=HELZ PE=1 SV=2		adenyl nucleotide binding;adenyl ribonucleotide binding;ATP binding;binding;catalytic activity;cation binding;helicase activity;hydrolase activity;hydrolase activity, acting on acid anhydrides;hydrolase activity, acting on acid anhydrides, in phosphorus-containing anhydrides;ion binding;metal ion binding;nucleoside-triphosphatase activity;nucleotide binding;purine nucleotide binding;purine ribonu…
26.568	26.2485	26.2594	26.3924	26.495	26.3717	26.4622	26.6324	26.6262		1.04323		0.898831		0.861583		0.612892	1	0.0610606	0.547913	0.0849177	0.164141	-0.153878	-2.2786	0.144244	0.268904	-0.214938	-1.81181	33	33	33	190.68	174.08	1006600000	161	16	17	18	19	16	18	13	22	22	O00443	Phosphatidylinositol 4-phosphate 3-kinase C2 domain-containing subunit alpha	PIK3C2A	sp|O00443|P3C2A_HUMAN Phosphatidylinositol 4-phosphate 3-kinase C2 domain-containing subunit alpha OS=Homo sapiens OX=9606 GN=PIK3C2A PE=1 SV=2	adaptive immune response;biological regulation;biosynthetic process;cell activation;cell chemotaxis;cell migration;cell motility;cell surface receptor linked signaling pathway;cellular biosynthetic process;cellular component assembly;cellular component assembly at cellular level;cellular component movement;cellular component organization;cellular component organization at cellular level;cellular …	1-phosphatidylinositol-3-kinase activity;adenyl nucleotide binding;adenyl ribonucleotide binding;ATP binding;binding;catalytic activity;inositol or phosphatidylinositol kinase activity;kinase activity;lipid binding;lipid kinase activity;nucleotide binding;phosphatidylinositol 3-kinase activity;phosphatidylinositol binding;phosphatidylinositol kinase activity;phosphatidylinositol phosphate kinase …
28.7383	28.7343	28.775	28.938	28.8867	28.528	29.0547	28.8599	28.9462		1.02457		0.889197		0.867874		0.8004	1	0.035017	0.270165	0.295028	0.414864	-0.169425	-1.20381	0.024107	0.0855276	-0.204442	-3.53568	33	33	33	77.672	149.6	5533300000	193	17	20	22	19	20	20	19	24	32	O15226	NF-kappa-B-repressing factor	NKRF	sp|O15226|NKRF_HUMAN NF-kappa-B-repressing factor OS=Homo sapiens OX=9606 GN=NKRF PE=1 SV=2	biological regulation;biosynthetic process;cellular biosynthetic process;cellular macromolecule biosynthetic process;cellular macromolecule metabolic process;cellular metabolic process;cellular nitrogen compound metabolic process;cellular process;macromolecule biosynthetic process;macromolecule metabolic process;metabolic process;negative regulation of biological process;negative regulation of bi…	binding;DNA binding;nucleic acid binding
27.8238	27.4927	27.8303	27.8283	27.7912	27.8327	28.1074	27.9283	28.0842		1.07311		0.857024		0.798634		0.415743	1	0.101801	0.90692	0.0182432	0.0579541	-0.222593	-3.85381	0.0601733	0.150674	-0.324394	-2.59802	33	33	26	103.96	199.02	2878200000	192	22	16	18	21	19	19	28	23	26	O94973;A0A0G2JS82;A0A0G2JQM1	AP-2 complex subunit alpha-2	AP2A2	sp|O94973|AP2A2_HUMAN AP-2 complex subunit alpha-2 OS=Homo sapiens OX=9606 GN=AP2A2 PE=1 SV=2;tr|A0A0G2JS82|A0A0G2JS82_HUMAN AP-2 complex subunit alpha-2 (Fragment) OS=Homo sapiens OX=9606 GN=AP2A2 PE=1 SV=1;tr|A0A0G2JQM1|A0A0G2JQM1_HUMAN AP-2 complex subu	antigen processing and presentation;antigen processing and presentation of exogenous antigen;antigen processing and presentation of exogenous peptide antigen;antigen processing and presentation of exogenous peptide antigen via MHC class II;antigen processing and presentation of peptide antigen;antigen processing and presentation of peptide antigen via MHC class II;antigen processing and presentat…	binding;enzyme binding;kinase binding;lipid binding;protein binding;protein kinase binding;protein transporter activity;substrate-specific transporter activity;transporter activity
29.6011	29.5639	29.3132	29.8049	29.6678	29.4408	29.5763	29.4697	28.8057		1.10579		1.27804		1.15577		0.356883	1	0.145079	1.04045	0.250226	0.362697	0.353937	1.34363	0.462768	0.624277	0.208857	0.811182	33	33	33	69.842	197.39	8057600000	226	24	23	30	25	21	26	26	23	28	P12956;B1AHC9	X-ray repair cross-complementing protein 6	XRCC6	sp|P12956|XRCC6_HUMAN X-ray repair cross-complementing protein 6 OS=Homo sapiens OX=9606 GN=XRCC6 PE=1 SV=2;tr|B1AHC9|B1AHC9_HUMAN ATP-dependent DNA helicase 2 subunit 1 OS=Homo sapiens OX=9606 GN=XRCC6 PE=1 SV=1	anatomical structure development;anatomical structure homeostasis;biological regulation;biosynthetic process;brain development;cellular biosynthetic process;cellular component organization;cellular component organization at cellular level;cellular component organization or biogenesis;cellular component organization or biogenesis at cellular level;cellular hyperosmotic response;cellular hyperosmot…	5'-deoxyribose-5-phosphate lyase activity;adenyl nucleotide binding;adenyl ribonucleotide binding;ATP binding;ATPase activity;ATPase activity, coupled;ATP-dependent DNA helicase activity;ATP-dependent helicase activity;binding;carbon-oxygen lyase activity;catalytic activity;damaged DNA binding;DNA binding;DNA helicase activity;DNA-dependent ATPase activity;double-stranded DNA binding;helicase act…
27.8503	27.8123	28.0453	27.9696	27.6324	27.9734	27.8766	27.4613	27.8531		0.969835		1.09287		1.12686		0.758293	1	-0.0441888	-0.329524	0.506579	0.649775	0.128116	0.728659	0.322539	0.476244	0.172305	1.12762	33	33	29	102.48	133.05	2739400000	194	19	15	21	21	23	20	22	28	25	P19367	Hexokinase-1	HK1	sp|P19367|HXK1_HUMAN Hexokinase-1 OS=Homo sapiens OX=9606 GN=HK1 PE=1 SV=3	alcohol catabolic process;alcohol metabolic process;biological regulation;carbohydrate catabolic process;carbohydrate homeostasis;carbohydrate metabolic process;carbohydrate phosphorylation;carbohydrate transport;catabolic process;cellular carbohydrate catabolic process;cellular carbohydrate metabolic process;cellular chemical homeostasis;cellular glucose homeostasis;cellular homeostasis;cellular…	adenyl nucleotide binding;adenyl ribonucleotide binding;ATP binding;binding;carbohydrate kinase activity;catalytic activity;fructokinase activity;glucokinase activity;hexokinase activity;kinase activity;mannokinase activity;nucleotide binding;phosphotransferase activity, alcohol group as acceptor;purine nucleotide binding;purine ribonucleoside triphosphate binding;purine ribonucleotide binding;ri…
28.6734	28.4886	28.7635	28.9167	28.9286	28.3839	29.2679	29.0417	29.0817		1.07267		0.764507	+	0.712716	GPR30_NES	0.634555	1	0.101201	0.51367	0.114728	0.202776	-0.387398	-2.01054	0.0102272	0.0498003	-0.4886	-4.57433	33	33	33	101.11	284.44	5700300000	217	20	24	21	24	26	21	28	27	26	P56192	Methionine--tRNA ligase, cytoplasmic	MARS	sp|P56192|SYMC_HUMAN Methionine--tRNA ligase, cytoplasmic OS=Homo sapiens OX=9606 GN=MARS1 PE=1 SV=2	amine metabolic process;amino acid activation;carboxylic acid metabolic process;cellular amine metabolic process;cellular amino acid metabolic process;cellular ketone metabolic process;cellular macromolecule metabolic process;cellular metabolic process;cellular nitrogen compound metabolic process;cellular process;gene expression;macromolecule metabolic process;metabolic process;methionyl-tRNA ami…	adenyl nucleotide binding;adenyl ribonucleotide binding;aminoacyl-tRNA ligase activity;ATP binding;binding;catalytic activity;ligase activity;ligase activity, forming aminoacyl-tRNA and related compounds;ligase activity, forming carbon-oxygen bonds;methionine-tRNA ligase activity;nucleic acid binding;nucleotide binding;purine nucleotide binding;purine ribonucleoside triphosphate binding;purine ri…
25.7383	25.342	25.9173	26.083	25.4334	25.9073	26.3331	26.1776	26.364		1.10343		0.715166		0.648132		0.611251	1	0.141991	0.550538	0.0751818	0.149394	-0.483649	-2.38983	0.0252231	0.0876474	-0.62564	-3.48561	33	33	33	160.88	106.9	811090000	141	13	9	18	15	9	15	21	18	23	Q10570	Cleavage and polyadenylation specificity factor subunit 1	CPSF1	sp|Q10570|CPSF1_HUMAN Cleavage and polyadenylation specificity factor subunit 1 OS=Homo sapiens OX=9606 GN=CPSF1 PE=1 SV=2	biosynthetic process;cellular biosynthetic process;cellular macromolecule biosynthetic process;cellular macromolecule metabolic process;cellular metabolic process;cellular nitrogen compound metabolic process;cellular process;establishment of localization;establishment of localization in cell;establishment of RNA localization;gene expression;intracellular transport;macromolecule biosynthetic proce…	binding;mRNA 3'-UTR binding;mRNA binding;nucleic acid binding;RNA binding
27.2825	27.2718	27.2451	27.369	27.3784	27.6179	27.0596	26.9547	27.3235		1.13971		1.26795		1.11252		0.0833918	1	0.188665	2.29505	0.0663094	0.140231	0.342498	2.50643	0.23552	0.38219	0.153833	1.39489	33	33	33	100.89	272	1777300000	188	17	18	26	23	18	24	24	19	19	Q13206;E9PIF2;A0A3B3ISR7	Probable ATP-dependent RNA helicase DDX10	DDX10	sp|Q13206|DDX10_HUMAN Probable ATP-dependent RNA helicase DDX10 OS=Homo sapiens OX=9606 GN=DDX10 PE=1 SV=2;tr|E9PIF2|E9PIF2_HUMAN RNA helicase OS=Homo sapiens OX=9606 GN=DDX10 PE=1 SV=1;tr|A0A3B3ISR7|A0A3B3ISR7_HUMAN RNA helicase OS=Homo sapiens OX=9606 GN	cellular macromolecule metabolic process;cellular metabolic process;cellular nitrogen compound metabolic process;cellular process;macromolecule metabolic process;metabolic process;nitrogen compound metabolic process;nucleic acid metabolic process;nucleobase-containing compound metabolic process;primary metabolic process;RNA metabolic process;RNA secondary structure unwinding	adenyl nucleotide binding;adenyl ribonucleotide binding;ATP binding;ATPase activity;ATPase activity, coupled;ATP-dependent helicase activity;ATP-dependent RNA helicase activity;binding;catalytic activity;helicase activity;hydrolase activity;hydrolase activity, acting on acid anhydrides;hydrolase activity, acting on acid anhydrides, in phosphorus-containing anhydrides;nucleic acid binding;nucleosi…
27.8089	27.6875	27.684	27.6497	27.7943	27.6214	27.7629	27.8614	27.5156		0.973786		0.982936		1.0094		0.600323	1	-0.0383237	-0.568126	0.840929	0.914807	-0.0248311	-0.214115	0.908926	0.952715	0.0134926	0.121807	33	33	32	112.03	224.97	2510500000	194	22	19	20	23	25	20	22	20	23	Q16513	Serine/threonine-protein kinase N2	PKN2	sp|Q16513|PKN2_HUMAN Serine/threonine-protein kinase N2 OS=Homo sapiens OX=9606 GN=PKN2 PE=1 SV=1	ameboidal cell migration;apical junction assembly;apoptosis;biological adhesion;biological regulation;biosynthetic process;cell adhesion;cell cycle;cell death;cell division;cell junction assembly;cell junction organization;cell migration;cell motility;cell-cell junction assembly;cell-cell junction organization;cellular biosynthetic process;cellular component assembly;cellular component assembly a…	adenyl nucleotide binding;adenyl ribonucleotide binding;ATP binding;binding;catalytic activity;enzyme binding;histone deacetylase binding;kinase activity;nucleotide binding;phosphotransferase activity, alcohol group as acceptor;protein binding;protein kinase activity;protein kinase C activity;protein serine/threonine kinase activity;purine nucleotide binding;purine ribonucleoside triphosphate bin…
27.4297	27.5454	27.3853	27.3666	27.3717	27.439	26.9684	27.0494	27.138		0.95861	+	1.26622	+	1.32089	GPR30_NES;GPR30-E2_NES	0.31507	1	-0.0609843	-1.14769	0.00328943	0.0216981	0.340528	6.27658	0.00420381	0.0278863	0.401513	5.87102	33	33	33	141.1	157.78	1704400000	180	22	19	19	20	19	20	21	20	20	Q2NKX8;B5MDQ0	DNA excision repair protein ERCC-6-like	ERCC6L	sp|Q2NKX8|ERC6L_HUMAN DNA excision repair protein ERCC-6-like OS=Homo sapiens OX=9606 GN=ERCC6L PE=1 SV=1;tr|B5MDQ0|B5MDQ0_HUMAN DNA excision repair protein ERCC-6-like OS=Homo sapiens OX=9606 GN=ERCC6L PE=1 SV=1	biological regulation;cell cycle;cell cycle phase;cell cycle process;cell division;cellular component organization;cellular component organization at cellular level;cellular component organization or biogenesis;cellular component organization or biogenesis at cellular level;cellular process;cellular response to stimulus;intracellular signal transduction;mitosis;mitotic cell cycle;nuclear division…	adenyl nucleotide binding;adenyl ribonucleotide binding;ATP binding;binding;catalytic activity;DNA binding;helicase activity;hydrolase activity;hydrolase activity, acting on acid anhydrides;hydrolase activity, acting on acid anhydrides, in phosphorus-containing anhydrides;nucleic acid binding;nucleoside-triphosphatase activity;nucleotide binding;purine nucleotide binding;purine ribonucleoside tri…
26.8691	27.2974	26.887	26.9822	26.8843	27.0779	26.9398	27.5951	27.4151		0.975069		0.792659		0.812926		0.820793	1	-0.0364234	-0.241845	0.174509	0.277084	-0.335227	-1.64892	0.281676	0.43438	-0.298804	-1.24323	33	33	33	101.37	230.25	1796200000	166	17	20	16	12	19	19	19	23	21	Q5JSH3;H7BY83	WD repeat-containing protein 44	WDR44	sp|Q5JSH3|WDR44_HUMAN WD repeat-containing protein 44 OS=Homo sapiens OX=9606 GN=WDR44 PE=1 SV=1;tr|H7BY83|H7BY83_HUMAN WD repeat-containing protein 44 (Fragment) OS=Homo sapiens OX=9606 GN=WDR44 PE=1 SV=1
25.5319	25.4747	25.2752	25.118	24.9926	25.0938	24.737	24.7413	24.6871		0.779639	+	1.27131	+	1.63065	GPR30_NES;GPR30-E2_NES	0.0143832	1	-0.359122	-4.13943	0.00119746	0.0136349	0.346321	8.21367	0.000900345	0.0178851	0.705443	8.84936	33	33	33	134.42	179.65	371600000	108	13	12	15	13	7	15	11	12	10	Q96R06	Sperm-associated antigen 5	SPAG5	sp|Q96R06|SPAG5_HUMAN Sperm-associated antigen 5 OS=Homo sapiens OX=9606 GN=SPAG5 PE=1 SV=2	biological regulation;cell cycle process;cell division;cellular component organization;cellular component organization at cellular level;cellular component organization or biogenesis;cellular component organization or biogenesis at cellular level;cellular process;chromosome organization;chromosome segregation;cytoskeleton organization;microtubule cytoskeleton organization;microtubule-based proces…
25.8413	25.8377	25.5496	25.8698	25.8086	25.6843	25.9354	26.0761	25.6727		1.03145		0.928397		0.900091		0.707882	1	0.0446707	0.402524	0.456631	0.595963	-0.107187	-0.823221	0.376227	0.531816	-0.151857	-0.994596	33	33	33	153.1	110.28	719450000	135	9	10	16	11	11	20	16	20	22	Q99570	Phosphoinositide 3-kinase regulatory subunit 4	PIK3R4	sp|Q99570|PI3R4_HUMAN Phosphoinositide 3-kinase regulatory subunit 4 OS=Homo sapiens OX=9606 GN=PIK3R4 PE=1 SV=3	activation of immune response;activation of innate immune response;autophagy;biological regulation;biosynthetic process;catabolic process;cell communication;cell surface receptor linked signaling pathway;cellular biosynthetic process;cellular catabolic process;cellular component organization;cellular component organization at cellular level;cellular component organization or biogenesis;cellular c…	adenyl nucleotide binding;adenyl ribonucleotide binding;ATP binding;binding;catalytic activity;kinase activity;nucleotide binding;phosphotransferase activity, alcohol group as acceptor;protein kinase activity;protein serine/threonine kinase activity;purine nucleotide binding;purine ribonucleoside triphosphate binding;purine ribonucleotide binding;ribonucleotide binding;transferase activity;transf…
29.272	29.2167	29.3917	29.5272	29.6248	29.6196	29.1909	29.0119	29.4284		1.22865		1.30144		1.05924		0.00803592	1	0.29708	4.9014	0.0381312	0.0989658	0.380108	3.04723	0.561299	0.720274	0.0830282	0.632691	33	33	33	73.964	187.77	7404900000	304	31	33	33	32	38	33	34	33	37	Q9BZE4	Nucleolar GTP-binding protein 1	GTPBP4	sp|Q9BZE4|GTPB4_HUMAN GTP-binding protein 4 OS=Homo sapiens OX=9606 GN=GTPBP4 PE=1 SV=3	biological regulation;cell differentiation;cellular component biogenesis;cellular component biogenesis at cellular level;cellular component organization or biogenesis;cellular component organization or biogenesis at cellular level;cellular developmental process;cellular process;developmental process;metabolic process;negative regulation of binding;negative regulation of biological process;negativ…	binding;catalytic activity;GTP binding;GTPase activity;guanyl nucleotide binding;guanyl ribonucleotide binding;hydrolase activity;hydrolase activity, acting on acid anhydrides;hydrolase activity, acting on acid anhydrides, in phosphorus-containing anhydrides;nucleoside-triphosphatase activity;nucleotide binding;purine nucleotide binding;purine ribonucleoside triphosphate binding;purine ribonucleo…
26.4189	26.7856	26.5118	26.054	26.2663	26.4561	26.9628	27.4481	27.2369		0.804811	+	0.515076		0.639996	GPR30-E2_NES	0.121841	1	-0.313278	-1.95795	0.00629346	0.0312042	-0.957143	-5.25087	0.0226059	0.0825415	-0.643864	-3.60754	33	33	33	181.79	323.31	1440900000	151	15	14	18	10	10	17	22	20	25	Q9C0C2	182 kDa tankyrase-1-binding protein	TNKS1BP1	sp|Q9C0C2|TB182_HUMAN 182 kDa tankyrase-1-binding protein OS=Homo sapiens OX=9606 GN=TNKS1BP1 PE=1 SV=4	anatomical structure homeostasis;biological regulation;biosynthetic process;catabolic process;cellular biosynthetic process;cellular catabolic process;cellular component organization;cellular component organization at cellular level;cellular component organization or biogenesis;cellular component organization or biogenesis at cellular level;cellular macromolecule biosynthetic process;cellular mac…	ankyrin binding;binding;cytoskeletal protein binding;enzyme binding;protein binding
28.6207	28.3431	28.4801	28.5457	28.477	28.3546	28.7956	28.7172	28.7081		0.984702	+	0.822892		0.835676	GPR30-E2_NES	0.831089	1	-0.022241	-0.227639	0.010768	0.0430491	-0.281225	-4.5066	0.0378942	0.11499	-0.258984	-3.05361	33	33	24	121.89	323.31	4413400000	219	22	15	24	28	21	19	32	28	30	Q9NZB2;A0A0C4DG79	Constitutive coactivator of PPAR-gamma-like protein 1	FAM120A	sp|Q9NZB2|F120A_HUMAN Constitutive coactivator of PPAR-gamma-like protein 1 OS=Homo sapiens OX=9606 GN=FAM120A PE=1 SV=2;tr|A0A0C4DG79|A0A0C4DG79_HUMAN Constitutive coactivator of PPAR-gamma-like protein 1 (Fragment) OS=Homo sapiens OX=9606 GN=FAM120A PE=1
26.1494	26.1727	26.5673	26.0727	25.7395	26.1903	26.62	26.5317	26.5303		0.814702		0.678378		0.83267		0.197163	1	-0.295655	-1.54531	0.0154661	0.051905	-0.559838	-4.05075	0.129744	0.248808	-0.264183	-1.9033	33	33	33	194	149.42	1014900000	126	7	13	16	10	11	14	14	20	21	Q9UPQ9;H0Y720	Trinucleotide repeat-containing gene 6B protein	TNRC6B	sp|Q9UPQ9|TNR6B_HUMAN Trinucleotide repeat-containing gene 6B protein OS=Homo sapiens OX=9606 GN=TNRC6B PE=1 SV=4;tr|H0Y720|H0Y720_HUMAN Trinucleotide repeat-containing gene 6B protein (Fragment) OS=Homo sapiens OX=9606 GN=TNRC6B PE=1 SV=1	biological regulation;cell surface receptor linked signaling pathway;cellular process;cellular response to chemical stimulus;cellular response to fibroblast growth factor stimulus;cellular response to growth factor stimulus;cellular response to organic substance;cellular response to stimulus;defense response;enzyme linked receptor protein signaling pathway;epidermal growth factor receptor signali…	binding;nucleotide binding
26.1856	26.2901	26.0991	25.8415	25.9215	26.1561	26.2098	26.5314	26.1412		0.859429		0.800479		0.931407		0.1163	1	-0.218549	-1.99862	0.103679	0.187809	-0.321065	-2.09978	0.481812	0.644782	-0.102516	-0.774607	33	33	33	161	171.77	867160000	152	17	16	14	17	12	17	20	18	21	Q9Y2L5;J3QQJ5;J3KSL8;J3QSA1	Trafficking protein particle complex subunit 8	TRAPPC8	sp|Q9Y2L5|TPPC8_HUMAN Trafficking protein particle complex subunit 8 OS=Homo sapiens OX=9606 GN=TRAPPC8 PE=1 SV=2;tr|J3QQJ5|J3QQJ5_HUMAN Trafficking protein particle complex subunit 8 OS=Homo sapiens OX=9606 GN=TRAPPC8 PE=1 SV=1;tr|J3KSL8|J3KSL8_HUMAN Traf	autophagic vacuole assembly;autophagy;catabolic process;cellular catabolic process;cellular component assembly;cellular component assembly at cellular level;cellular component organization;cellular component organization at cellular level;cellular component organization or biogenesis;cellular component organization or biogenesis at cellular level;cellular localization;cellular macromolecule local…
26.1509	25.9591	25.8359	26.1184	25.3184	25.8956	26.3937	25.8959	26.3239		0.867844		0.743795		0.857061		0.46817	1	-0.204492	-0.80069	0.207997	0.316329	-0.427023	-1.50001	0.285402	0.437645	-0.222531	-1.23205	32	26	26	553.12	87.559	798780000	101	18	4	9	13	4	7	22	11	13	A0A075B730;P58107	Epiplakin	EPPK1	tr|A0A075B730|A0A075B730_HUMAN Epiplakin OS=Homo sapiens OX=9606 GN=EPPK1 PE=1 SV=2;sp|P58107|EPIPL_HUMAN Epiplakin OS=Homo sapiens OX=9606 GN=EPPK1 PE=1 SV=3
27.2135	27.1864	27.2477	27.3297	27.0266	27.3777	27.2733	26.9845	27.2683		1.02017		1.04925		1.0285		0.808554	1	0.0288124	0.258811	0.658631	0.796151	0.0693525	0.476422	0.697708	0.829965	0.0405401	0.41756	32	32	1	99.132	167.96	1678500000	174	14	16	20	21	24	20	19	19	21	A0A2R8Y3X5;O60313;A0A2R8YE78;A0A2R8YDM2;C9JMB8;A0A2R8YFD1;A0A2R8YGE5	Dynamin-like 120 kDa protein, mitochondrial;Dynamin-like 120 kDa protein, form S1	OPA1	tr|A0A2R8Y3X5|A0A2R8Y3X5_HUMAN Dynamin-like 120 kDa protein, form S1 OS=Homo sapiens OX=9606 GN=OPA1 PE=1 SV=1;sp|O60313|OPA1_HUMAN Dynamin-like 120 kDa protein, mitochondrial OS=Homo sapiens OX=9606 GN=OPA1 PE=1 SV=3;tr|A0A2R8YE78|A0A2R8YE78_HUMAN Dynamin	aging;anatomical structure formation involved in morphogenesis;apoptosis;axon cargo transport;axon transport of mitochondrion;biological regulation;cell aging;cell death;cellular component movement;cellular component organization;cellular component organization at cellular level;cellular component organization or biogenesis;cellular component organization or biogenesis at cellular level;cellular …	binding;catalytic activity;cation binding;GTP binding;GTPase activity;guanyl nucleotide binding;guanyl ribonucleotide binding;hydrolase activity;hydrolase activity, acting on acid anhydrides;hydrolase activity, acting on acid anhydrides, in phosphorus-containing anhydrides;ion binding;magnesium ion binding;metal ion binding;nucleoside-triphosphatase activity;nucleotide binding;purine nucleotide b…
27.8903	27.4149	27.7003	27.851	27.1704	27.626	28.1405	27.4717	27.9272		0.920586		0.81374		0.883938		0.649316	1	-0.119376	-0.490737	0.34971	0.47497	-0.297359	-1.05801	0.50087	0.662178	-0.177984	-0.739098	32	32	3	80.902	220.37	2521600000	203	23	19	23	26	20	19	24	26	23	A0A6Q8PFJ0;P02545;A0A804HL68;A0A6Q8PHQ9;A0A6Q8PF80	Prelamin-A/C;Lamin-A/C	LMNA	tr|A0A6Q8PFJ0|A0A6Q8PFJ0_HUMAN Prelamin-A/C OS=Homo sapiens OX=9606 GN=LMNA PE=1 SV=1;sp|P02545|LMNA_HUMAN Prelamin-A/C OS=Homo sapiens OX=9606 GN=LMNA PE=1 SV=1;tr|A0A804HL68|A0A804HL68_HUMAN Prelamin-A/C OS=Homo sapiens OX=9606 GN=LMNA PE=4 SV=1;tr|A0A6Q	anatomical structure development;apoptosis;biological regulation;cardiac cell development;cardiac muscle cell development;cell cycle;cell cycle process;cell death;cell development;cellular component disassembly;cellular component disassembly at cellular level;cellular component disassembly involved in apoptosis;cellular component organization;cellular component organization at cellular level;cell…	structural molecule activity
26.1182	26.4133	26.0965	26.1621	26.5641	26.4354	26.0912	26.2989	26.2607		1.13118		1.12525		0.994759		0.319204	1	0.177831	1.13653	0.274633	0.389662	0.170251	1.26474	0.952841	0.977912	-0.00758044	-0.0629308	32	32	32	154.37	196.86	866190000	147	16	11	19	14	19	17	19	16	16	A0A6Q8PH09;Q9NVI1;A0A6Q8PGF4;F8W7R3;H3BP78	Fanconi anemia group I protein	FANCI	tr|A0A6Q8PH09|A0A6Q8PH09_HUMAN Fanconi anemia group I protein OS=Homo sapiens OX=9606 GN=FANCI PE=1 SV=1;sp|Q9NVI1|FANCI_HUMAN Fanconi anemia group I protein OS=Homo sapiens OX=9606 GN=FANCI PE=1 SV=4;tr|A0A6Q8PGF4|A0A6Q8PGF4_HUMAN Fanconi anemia group I p	biological regulation;cell cycle;cellular macromolecule metabolic process;cellular metabolic process;cellular nitrogen compound metabolic process;cellular process;cellular response to stimulus;cellular response to stress;DNA metabolic process;DNA repair;macromolecule metabolic process;metabolic process;nitrogen compound metabolic process;nucleic acid metabolic process;nucleobase-containing compou…	binding;DNA binding;DNA polymerase binding;enzyme binding;nucleic acid binding;protein binding
27.1985	27.5076	26.8231	27.2059	27.304	27.117	27.4625	27.918	27.2576		1.02282		0.79166		0.773995		0.881592	1	0.0325578	0.158704	0.171324	0.272479	-0.337047	-1.6646	0.254354	0.403321	-0.369605	-1.32978	32	32	32	103.28	188.19	1934000000	167	19	16	18	17	18	20	14	22	23	P55786;E9PLK3;A0A7I2V3W8;A0A7I2V389	Puromycin-sensitive aminopeptidase	NPEPPS	sp|P55786|PSA_HUMAN Puromycin-sensitive aminopeptidase OS=Homo sapiens OX=9606 GN=NPEPPS PE=1 SV=2;tr|E9PLK3|E9PLK3_HUMAN Aminopeptidase OS=Homo sapiens OX=9606 GN=NPEPPS PE=1 SV=1;tr|A0A7I2V3W8|A0A7I2V3W8_HUMAN Aminopeptidase OS=Homo sapiens OX=9606 GN=NP	antigen processing and presentation;antigen processing and presentation of peptide antigen;antigen processing and presentation of peptide antigen via MHC class I;cellular macromolecule metabolic process;cellular metabolic process;cellular process;cellular protein metabolic process;cellular response to chemical stimulus;cellular response to hypoxia;cellular response to oxygen levels;cellular respo…	aminopeptidase activity;binding;catalytic activity;cation binding;exopeptidase activity;hydrolase activity;ion binding;metal ion binding;metallopeptidase activity;peptidase activity;peptidase activity, acting on L-amino acid peptides;transition metal ion binding;zinc ion binding
28.0569	28.2596	27.8888	28.2611	28.3208	27.9799	28.2118	28.7949	28.077		1.08586		0.886424		0.816331		0.472858	1	0.118843	0.791661	0.51545	0.658553	-0.17393	-0.712611	0.298063	0.450236	-0.292774	-1.19509	32	32	32	118.82	229.39	3764000000	192	18	20	17	23	21	20	27	24	22	I3L2C7;P57678	Gem-associated protein 4	GEMIN4	tr|I3L2C7|I3L2C7_HUMAN Gem-associated protein 4 OS=Homo sapiens OX=9606 GN=GEMIN4 PE=1 SV=1;sp|P57678|GEMI4_HUMAN Gem-associated protein 4 OS=Homo sapiens OX=9606 GN=GEMIN4 PE=1 SV=2	cellular component assembly;cellular component assembly at cellular level;cellular component organization;cellular component organization at cellular level;cellular component organization or biogenesis;cellular component organization or biogenesis at cellular level;cellular macromolecular complex assembly;cellular macromolecular complex subunit organization;cellular macromolecule metabolic proces…
27.0119	26.641	27.3866	27.1819	27.0251	27.3691	26.9299	26.5123	26.97		1.13199		1.30852		1.15595		0.492599	1	0.178858	0.754382	0.0934303	0.173928	0.387939	2.19251	0.466811	0.628448	0.20908	0.80332	32	32	32	138.62	219.24	1473900000	152	11	11	24	18	14	20	18	16	20	O00411	DNA-directed RNA polymerase, mitochondrial	POLRMT	sp|O00411|RPOM_HUMAN DNA-directed RNA polymerase, mitochondrial OS=Homo sapiens OX=9606 GN=POLRMT PE=1 SV=2	biosynthetic process;cellular biosynthetic process;cellular component organization;cellular component organization at cellular level;cellular component organization or biogenesis;cellular component organization or biogenesis at cellular level;cellular macromolecule biosynthetic process;cellular macromolecule metabolic process;cellular metabolic process;cellular nitrogen compound metabolic process…	binding;catalytic activity;DNA binding;DNA-directed RNA polymerase activity;nucleic acid binding;nucleotidyltransferase activity;RNA polymerase activity;transferase activity;transferase activity, transferring phosphorus-containing groups
27.3437	27.9783	27.7161	27.2836	27.4781	27.7495	28.1086	28.7341	28.3516		0.88539		0.537971		0.607609		0.484785	1	-0.175615	-0.768999	0.0168925	0.0548764	-0.894398	-3.94473	0.0500261	0.136374	-0.718784	-2.77594	32	32	32	146.2	301.34	3140000000	190	18	19	20	18	18	18	23	29	27	O60271;A0A087X2D8	C-Jun-amino-terminal kinase-interacting protein 4	SPAG9	sp|O60271|JIP4_HUMAN C-Jun-amino-terminal kinase-interacting protein 4 OS=Homo sapiens OX=9606 GN=SPAG9 PE=1 SV=4;tr|A0A087X2D8|A0A087X2D8_HUMAN C-Jun-amino-terminal kinase-interacting protein 4 OS=Homo sapiens OX=9606 GN=SPAG9 PE=1 SV=1	activation of JUN kinase activity;activation of MAPK activity;biological regulation;cell differentiation;cellular component assembly;cellular component organization;cellular component organization or biogenesis;cellular developmental process;cellular macromolecule metabolic process;cellular metabolic process;cellular process;cellular protein metabolic process;developmental process;endosome transp…	binding;binding, bridging;cytoskeletal protein binding;enzyme binding;JUN kinase binding;kinase binding;kinesin binding;MAP-kinase scaffold activity;protein binding;protein complex scaffold;protein kinase binding;receptor signaling complex scaffold activity;signaling adaptor activity;structural molecule activity
28.054	27.8937	27.8051	28	27.8736	27.7689	27.9489	27.9517	27.7831		0.974825		0.990527		1.01611		0.728611	1	-0.0367845	-0.372219	0.882215	0.939242	-0.0137316	-0.157861	0.81392	0.902683	0.0230529	0.251362	32	32	32	89.594	173.8	2926400000	217	25	19	25	24	20	26	30	19	29	O94874	E3 UFM1-protein ligase 1	UFL1	sp|O94874|UFL1_HUMAN E3 UFM1-protein ligase 1 OS=Homo sapiens OX=9606 GN=UFL1 PE=1 SV=2	biological regulation;cell differentiation;cellular developmental process;cellular macromolecule metabolic process;cellular metabolic process;cellular process;cellular protein metabolic process;cellular response to stimulus;cellular response to stress;developmental process;macromolecule metabolic process;macromolecule modification;metabolic process;negative regulation of biological process;negati…	acid-amino acid ligase activity;catalytic activity;ligase activity;ligase activity, forming carbon-nitrogen bonds;small conjugating protein ligase activity;UFM1 conjugating enzyme activity
26.1597	25.5308	26.3306	26.1911	26.201	26.5319	26.1096	25.6673	26.3215		1.23196		1.21013		0.982284		0.323841	1	0.300951	1.12417	0.284572	0.401344	0.275162	1.23453	0.937752	0.969009	-0.0257886	-0.0831162	32	32	31	194.81	147.24	796240000	124	17	7	17	17	11	13	14	10	18	O95602;B9ZVN9	DNA-directed RNA polymerase I subunit RPA1;DNA-directed RNA polymerase	POLR1A	sp|O95602|RPA1_HUMAN DNA-directed RNA polymerase I subunit RPA1 OS=Homo sapiens OX=9606 GN=POLR1A PE=1 SV=2;tr|B9ZVN9|B9ZVN9_HUMAN DNA-directed RNA polymerase subunit OS=Homo sapiens OX=9606 GN=POLR1A PE=1 SV=1	biological regulation;biosynthetic process;cellular biosynthetic process;cellular macromolecule biosynthetic process;cellular macromolecule metabolic process;cellular metabolic process;cellular nitrogen compound metabolic process;cellular process;gene expression;macromolecule biosynthetic process;macromolecule metabolic process;metabolic process;negative regulation of biological process;negative …	binding;catalytic activity;cation binding;DNA binding;DNA-directed RNA polymerase activity;ion binding;metal ion binding;nucleic acid binding;nucleotidyltransferase activity;RNA polymerase activity;transferase activity;transferase activity, transferring phosphorus-containing groups;transition metal ion binding;zinc ion binding
31.0327	31.2017	31.328	30.9436	31.3532	31.4437	29.4174	29.2478	29.446		1.04201	+	3.6717	+	3.52367	GPR30_NES;GPR30-E2_NES	0.752847	1	0.0593713	0.337301	0.000347544	0.0063622	1.87645	11.3166	6.68406e-05	0	1.81708	17.2128	32	32	32	68.569	323.31	17282000000	330	36	44	45	39	38	44	29	27	28	P04843;B7Z4L4	Dolichyl-diphosphooligosaccharide--protein glycosyltransferase subunit 1	RPN1	sp|P04843|RPN1_HUMAN Dolichyl-diphosphooligosaccharide--protein glycosyltransferase subunit 1 OS=Homo sapiens OX=9606 GN=RPN1 PE=1 SV=1;tr|B7Z4L4|B7Z4L4_HUMAN Dolichyl-diphosphooligosaccharide--protein glycosyltransferase subunit 1 OS=Homo sapiens OX=9606	biosynthetic process;carbohydrate metabolic process;cellular biosynthetic process;cellular carbohydrate metabolic process;cellular macromolecule biosynthetic process;cellular macromolecule metabolic process;cellular metabolic process;cellular process;cellular protein metabolic process;cotranslational protein targeting to membrane;establishment of localization;establishment of localization in cell…	catalytic activity;dolichyl-diphosphooligosaccharide-protein glycotransferase activity;oligosaccharyl transferase activity;transferase activity;transferase activity, transferring glycosyl groups;transferase activity, transferring hexosyl groups
30.7199	30.3174	30.4425	30.8871	30.4982	30.1986	30.3842	29.6522	29.6003		1.02432		1.56812		1.53088		0.888471	1	0.0346724	0.149396	0.114185	0.202499	0.649033	2.0147	0.0929659	0.203095	0.614361	2.19697	32	32	32	61.054	272.9	13379000000	271	32	25	36	37	26	25	37	25	28	P10809;A0A7I2V599;A0A7I2V2X6;A0A7I2YQK6	60 kDa heat shock protein, mitochondrial	HSPD1	sp|P10809|CH60_HUMAN 60 kDa heat shock protein, mitochondrial OS=Homo sapiens OX=9606 GN=HSPD1 PE=1 SV=2;tr|A0A7I2V599|A0A7I2V599_HUMAN 60 kDa chaperonin OS=Homo sapiens OX=9606 GN=HSPD1 PE=1 SV=1;tr|A0A7I2V2X6|A0A7I2V2X6_HUMAN 60 kDa chaperonin OS=Homo sa	activation of caspase activity;activation of immune response;activation of innate immune response;adaptive immune response;adaptive immune response based on somatic recombination of immune receptors built from immunoglobulin superfamily domains;B cell activation;B cell activation involved in immune response;B cell cytokine production;B cell mediated immunity;B cell proliferation;biological regula…	adenyl nucleotide binding;adenyl ribonucleotide binding;ATP binding;ATPase activity;binding;catalytic activity;chaperone binding;DNA binding;DNA replication origin binding;double-stranded RNA binding;enzyme binding;hydrolase activity;hydrolase activity, acting on acid anhydrides;hydrolase activity, acting on acid anhydrides, in phosphorus-containing anhydrides;lipopolysaccharide binding;nucleic a…
29.8607	29.7806	29.6327	29.6127	29.9856	29.7952	29.7927	29.6653	29.2351		1.02801		1.17566		1.14362		0.768781	1	0.0398598	0.314616	0.308143	0.429279	0.233473	1.1667	0.345997	0.50143	0.193614	1.06723	32	32	32	82.704	323.31	9104400000	262	31	23	31	33	26	33	35	24	26	P13010	X-ray repair cross-complementing protein 5	XRCC5	sp|P13010|XRCC5_HUMAN X-ray repair cross-complementing protein 5 OS=Homo sapiens OX=9606 GN=XRCC5 PE=1 SV=3	anatomical structure development;anatomical structure homeostasis;biological regulation;biosynthetic process;brain development;cell differentiation;cell proliferation;cellular biosynthetic process;cellular component organization;cellular component organization at cellular level;cellular component organization or biogenesis;cellular component organization or biogenesis at cellular level;cellular d…	adenyl nucleotide binding;adenyl ribonucleotide binding;ATP binding;ATPase activity;ATPase activity, coupled;ATP-dependent DNA helicase activity;ATP-dependent helicase activity;binding;catalytic activity;damaged DNA binding;DNA binding;DNA helicase activity;DNA-dependent ATPase activity;double-stranded DNA binding;enzyme binding;helicase activity;hydrolase activity;hydrolase activity, acting on a…
28.8839	29.0798	28.7913	28.9025	29.3012	28.5444	30.1209	29.92	30.4166		0.998411	+	0.424419	+	0.425095	GPR30_NES;GPR30-E2_NES	0.992663	0.999418	-0.00229454	-0.00978304	0.00916108	0.0398605	-1.23644	-4.72155	0.0018059	0.0174613	-1.23414	-7.37035	32	32	29	81.744	246.64	9482100000	274	29	23	27	32	29	24	37	34	39	P14923	Junction plakoglobin	JUP	sp|P14923|PLAK_HUMAN Junction plakoglobin OS=Homo sapiens OX=9606 GN=JUP PE=1 SV=3	adherens junction assembly;adherens junction organization;anatomical structure development;biological adhesion;biological regulation;cell adhesion;cell junction assembly;cell junction organization;cell migration;cell motility;cell surface receptor linked signaling pathway;cell-cell adhesion;cell-cell junction assembly;cell-cell junction organization;cellular component assembly;cellular component …	alpha-catenin binding;binding;cadherin binding;cell adhesion molecule binding;enzyme binding;identical protein binding;molecular transducer activity;phosphatase binding;protein binding;protein binding transcription factor activity;protein dimerization activity;protein homodimerization activity;protein phosphatase binding;signal transducer activity;structural constituent of cell wall;structural mo…
[truncated: 5,206 more rows]
[truncated: 2 more columns]

## Sheet: Maryam_14448-14604_Perseus_M3
Column	Type	Name	Size	Score	P value	Benj. Hoch. FDR	Mean	Median
Student's T-test Difference GPR30-E2_GPR30	GOCC name	nucleosome	12	0.833754	5.83284e-07	4.77043e-05	0.667058	0.522684
Student's T-test Difference GPR30-E2_GPR30	GOCC name	protein-DNA complex	21	0.453344	0.000329183	0.0125638	0.369577	0.341071
Student's T-test Difference GPR30-E2_GPR30	GOBP name	ribosome biogenesis	30	0.497714	2.4949e-06	0.00108292	0.397781	0.284435
Student's T-test Difference GPR30-E2_GPR30	GOMF name	snoRNA binding	20	0.576738	8.23628e-06	0.00407366	0.34296	0.268709
Student's T-test Difference GPR30-E2_GPR30	GOCC name	preribosome	38	0.537369	1.08191e-08	2.47758e-06	0.32323	0.24213
Student's T-test Difference GPR30-E2_GPR30	GOCC name	small-subunit processome	30	0.537398	3.69627e-07	3.52686e-05	0.343787	0.24213
[truncated: 1,924 more rows]
