# Supplementary material for: Proteomic Analyses of the G Protein-Coupled Estrogen Receptor GPER1 Reveal Constitutive Links to Endoplasmic Reticulum, Glycosylation, Trafficking, and Calcium Signaling
Source: Cells. 2023 Nov 3;12(21):2571. doi: 10.3390/cells12212571 (PMC10650109; doi:10.3390/cells12212571)
Supplement: Supplementary file 1 [file cells-12-02571-s001.zip › Supplementary Table S3.xlsx]

## Sheet: Sheet1
Proximity labeling-MS	Immunoprecipitation-MS (IP-MS)	Overlap
AAGAB	ABCD1	ACTN1
ACADM	ABCD3	ALDH3A2
ACBD3	ACLY	APMAP
ACBD5	ACTN1	B3GAT3
ACO2	AKAP1	BAG6;BAT3
ACTN1	ALDH3A2	CANX
ACTN4	ANAPC7	CCDC47
ADAM10	ANKHD1	CKAP4
ADAM17	AP1M1	CLCC1
ADAMTS1	AP2A1	CLPTM1
ADD1	APMAP	DDOST
ADPGK	ATP2B1;ATP2B4	EIF3E
AGPAT6	B3GAT3	EIF5B
AGRN	BAG2	EMC1
AHNAK	BAG6;BAT3	EMC2
AKR1B1	BAX	EMC7
ALCAM	BNIP1	EPB41
ALDH3A2	C7orf50	ERGIC1
ALG9	C8orf33	ERLIN2
ANK3	CAND1	FXR1
ANKRD52	CANX	GANAB
ANKZF1	CBX3	GPER1
ANLN	CCAR2	HMOX2
ANXA6	CCDC47	IK
AP2B1	CCT6A	LEMD3
APLP2	CDK1;CDC2	LMAN1
APMAP	CEP170	LMAN2
ARMC6	CKAP4	MAGT1
ASPH	CKAP5	MLLT4
ASPSCR1	CKB	MMGT1
ATP13A1	CLASP2	MOV10
ATP1A1	CLCC1	NUP210
ATP1B3	CLINT1	NUP214
ATP2A2	CLPTM1	PGRMC1
ATP6AP1	CNOT1	PGRMC2
ATP6AP2	COMT	PLOD1
B3GALT6	COPB1	PON2
B3GALTL	COPB2	POR
B3GAT3	COPE	PRKCSH
BAG6;BAT3	COPG1	PSMA1
BCAT1	COPG2	PSMA5
BOD1L1	CSNK2A2	PSMA6
BSG	CSTF1	PSMA7
C3orf58	CSTF3	PSMB1
CAB39	CTPS1	PSMC1
CALR	CYB5R3	PSMC3
CALU	DARS	PSMC5
CAMLG	DCP1A	PSMC6
CANX	DCTN1;DKFZp686E0752	PSMD1
CASK	DDOST	PSMD11
CC2D1A	DDRGK1	PSMD2
CCDC124	DDX1	PUM1
CCDC47	DDX20	RDH11
CCNK	DDX24	RPL15
CDC42EP4	DDX3X;DDX3Y	RPL24
CDH2	DIS3	RPL27A
CDK5RAP2	DNAJA1	RPN1
CDKAL1	DNAJA2	RPN2
CENPE	DNAJB6	SDF2L1
CES3	DNM1L	SEC11A
CGN	DYNC1LI1	SQSTM1
CHERP	DYNLT1	SSR4
CHID1	ECM29;KIAA0368	STIM1
CHPF2	EDC4	STT3A
CHST14	EEF1G	TMED10
CKAP4	EIF2B5	TMED4
CLCC1	EIF2S3;EIF2S3L	TMX1
CLGN	EIF3A	TMX2
CLPTM1	EIF3D	TMX4
CLPTM1L	EIF3E	TOR1AIP2
CLTB	EIF3M	UBQLN1
CLTC	EIF4E	UBQLN2
CNOT2	EIF4G1	UPF1
CNPY2	EIF5A;EIF5AL1;EIF5A2
CNPY3	EIF5B
COBLL1	EMC1
COLGALT1	EMC2
CPD	EMC4
CPE	EMC7
CPEB4	EMC8
CPNE3	EPB41
CPT2	ERGIC1
CREB3L2	ERLIN2
CRELD1	ESYT1
CRELD2	EXOSC1
CRTAP	EXOSC6
CS	FAF1
CSNK1G3;CSNK1G2	FLOT2
CTNNA1	FMR1
CTNNB1	FUBP3
CXADR	FXR1
CYB5A	GANAB
CYB5B	GCN1L1
DAG1	GEMIN4
DAGLB	GEMIN5
DBN1	GIGYF2
DCTN3	GLE1
DDOST	GNB2L1
DESI1	GOLIM4
DLG1	GOSR1
DNAJB1	GPER1
DNAJB11	HAT1
DNAJB12	HAUS2
DNAJC10	HAUS6
DNAJC3	HDAC2
DNAJC5	HM13
DPYSL2	HMOX2
DRG2	HNRNPUL1
DSG2	HSPA4
DST	HUWE1
DVL2	IGF2BP3
ECE1	IK
EDEM3	IMP3
EEA1	IMP4
EEF1D	IMPDH2
EIF3B	IPO5
EIF3E	KARS
EIF5	KCTD12
EIF5B	KPNA2
EMC1	KPNA6;KPNA5
EMC2	LARS
EMC7	LEMD3
EMD	LMAN1
EMILIN2	LMAN2
ENOPH1	LYAR
EP300	MAGED1
EPB41	MAGED2
EPB41L2	MAGT1
EPHX1	MAPRE2
EPS15L1	MCM6
ERBB2IP	MCM7
ERC1	MLF2
ERCC6L	MLLT4
ERGIC1	MMGT1
ERLEC1	MOV10
ERLIN1	MRPL14
ERLIN2	MSH6
ERMP1	MTX1
ERO1L	NAP1L1
ERO1LB	NAT10
ERP29	NELFA
ERP44	NLE1
ETFB	NOC2L
EZR	NOMO3;NOMO2
FAM20B	NONO
FAM3A	NOP16
FAM3C	NOP2
FAM8A1	NUP107
FAT1	NUP133
FBLN1	NUP155
FBN2	NUP160
FKBP10	NUP210
FKBP14	NUP214
FKBP4	NUP88
FKBP7	ORMDL1
FKBP9	OSBPL8
FLNA	PAICS
FLNB	PDCD6IP
FLNC	PDS5A
FRYL	PELP1
FUBP1	PGRMC1
FUCA2	PGRMC2
FXR1	PIGT
FXR2	PLOD1
G3BP1	POLD1
GALNT1	POLR1C
GALNT14	POLR2A
GALNT16	POLR2B
GALNT2	POLR2C
GALNT7	POLR2H
GANAB	PON2
GGT7	POR
GLA	PPP1CB
GLG1	PPP6R3
GMPPA	PRKCSH
GNAI3	PSMA1
GNAS	PSMA2
GOLGB1	PSMA3
GOPC	PSMA4
GPAA1	PSMA5
GPER1	PSMA6
GPRIN1	PSMA7
GRB2	PSMB1
GSTO1	PSMB2
GXYLT1	PSMB4
H6PD	PSMB5
HDGF	PSMC1
HECW2	PSMC2
HIP1	PSMC3
HMOX2	PSMC5
HNRNPA2B1;HNRPA2B1	PSMC6
HS6ST2	PSMD1
HSD17B10	PSMD11
HSP90B1	PSMD13
HSPA13	PSMD2
HSPA5	PSMD3
HSPE1	PSMD4
HYOU1	PSMD7
IFRD2	PTBP3
IGF2BP1	PTPN1
IGF2R	PUM1
IK	PWP2
IKBIP	QARS
INADL	QKI
IQGAP1	QPCTL
IQGAP2	RAB10
IRAK1	RAB32
IREB2	RAB3GAP2
ITSN2	RABL3
JPH1	RAE1
JUP	RARS
KDELC1	RAVER1
KDELC2	RBM28
KDM5A	RDH11
KHDRBS3	RFC2
KHSRP	RFC3
KIAA1462	RPA1
KIDINS220	RPL15
KIF11	RPL24
KIF5B	RPL26
LAMB1	RPL27A
LAMB2	RPL32
LAMC1	RPL35A
LAMTOR1	RPL5
LAMTOR3	RPL9
LARP4B	RPN1
LEMD3	RPN2
LEPRE1	RPS15
LEPREL2	RPS23
LEPREL4;P3H4	RPS24
LIMA1	RPS27
LIMCH1	RPS3A
LIN28B	RSL1D1
LLGL1	SAR1A;SAR1B
LMAN1	SCFD1
LMAN2	SDF2L1
LMAN2L	SEC11A
LMTK2	SEC16A
LRP1	SEC22B
LRPAP1	SEC23IP
LRRC1	SEC31A
LRRC59	Septin-2
LSR	SF3A3
LTA4H	SLC25A13
LTV1	SMARCB1
LUZP1	SMC2
LYN	SMC4
MACF1	SND1
MAGT1	SNRNP70
MANF	SNX2
MCFD2	SPCS2
MESDC2	SPTLC1
MFF	SQSTM1
MFGE8	SRP68
MIA3	SRPK1
MICAL3	SSR4
MINPP1	SSRP1
MLEC	STAT1
MLLT4	STAT3
MMGT1	STIM1
MOGS	STT3A
MOV10	STX18
MPP6	STX5
MPP7	SUPT16H
MPRIP	SYMPK
MRPL41	SYNCRIP
MYDGF	TBC1D15
MYH10	TECR
MYL6	TFIP11
NACA	TIMM44
NAF1	TJP2
NCKAP1	TMED10
NCL	TMED4
NCLN	TMEM209
NDUFB9	TMEM33
NENF	TMEM43
NEXN	TMX1
NF2	TMX2
NGLY1	TMX4
NID1	TOLLIP
NOB1	TOMM70A
NOMO2;NOMO3	TOP2A
NPTN;DKFZp566H1924	TOP2B
NRM	TOR1AIP2
NUCB2;Nucb2	TRIM25
NUDT21	TRIP12
NUFIP2	TRMT1L
NUP210	TUFM
NUP214	U2AF1
NUP93	U2AF2
OGFR	U2SURP
OS9	UBA1
P4HA1	UBE2S
P4HA2	UBQLN1
P4HB	UBQLN2
PABPC1	UBR5
PABPC4	UFL1
PACSIN2	UMPS
PAFAH1B3	UPF1
PALM	USO1
PALM3	USP9X
PCDH7	UTP11L
PCYOX1	UTP15
PCYOX1L	VAPA
PDCD4	VARS
PDCD5	VCP
PDIA3	VPS51
PDIA4	WDR12
PDIA6	ZC3HAV1
PGRMC1	ZFR
PGRMC2	ZNF24
PHACTR4	ZNF638
PI4K2A
PI4KA
PIGK
PIGO
PIGS
PIH1D1
PIK3CA
PIK3CB;DKFZp779K1237
PIK3R1
PIK3R2
PIK3R3
PLCD3
PLD3
PLEC
PLOD1
PLOD2
PLOD3
POFUT1
POFUT2
POMGNT2
POMK
PON2
POR
PPIB
PPIF
PPP1R12A
PPP1R15A
PPP1R9B
PPP2R1B
PRDX3
PRDX4
PREB
PRKCSH
PRRC2A
PRRC2B
PRRC2C
PSMA1
PSMA5
PSMA6
PSMA7
PSMB1
PSMB3
PSMB6
PSMC1
PSMC3
PSMC4
PSMC5
PSMC6
PSMD1
PSMD11
PSMD2
PTDSS1
PTDSS2
PUM1
PVRL2
PVRL3
RAC1;RAC2
RACGAP1
RAD54L2
RAI14
RANBP1
RASA2
RBBP6
RBM10
RBM17
RBM22
RBM26
RBM27
RCN1
RCN2
RDH11
REPS1
RGPD5
RHOT2
RNF126
RP2
RPAP1
RPL13A;RPL13a;RPL13AP3
RPL15
RPL19
RPL24
RPL27A
RPL28
RPN1
RPN2
RPRD2
RPS10;RPS10-NUDT3;RPS10P5
RPS27A
RRAS2
SACM1L
SCAMP1
SCRIB
SDF2
SDF2L1
SDF4
SEC11A
SEC63
SEL1L
SELT
Septin-2
Septin-6
SERPINH1
SF3B2
SIGMAR1
SIL1
SIN3B
SLC12A2
SLC1A5
SLC27A4
SLC4A7
SLC7A1
SLC9A3R1
SMS
SNAP23
SNX7
SOAT1
SPAG5
SPECC1L;SPECC1L-ADORA2A
SPTAN1
SPTBN1
SQSTM1
SRGAP2
SSR1
SSR4
ST13;ST13P5;ST13P4
STIM1
STK10
STT3A
STT3B
STX12
STX2
STX8
STXBP1
SUMF2
SUN1
SYNRG
SYP
TAB1
TAX1BP1
TEX264
THRAP3
TJP1
TLN1
TM9SF2
TMCO1
TMED1
TMED10
TMED2
TMED3
TMED4
TMED5
TMED7;TMED7-TICAM2
TMED9
TMEM30A
TMEM55B
TMF1
TMTC3
TMX1
TMX2
TMX3
TMX4
TNPO1
TOMM22
TOR1A
TOR1AIP1
TOR1AIP2
TOR1B
TOR3A
TP53BP2
TPX2
TRIM32
TRIP10
TRIP11
TTC13
TTC17
TTF2
TUBGCP4
TXNDC12
TXNDC15
TXNDC5
UBAC2
UBE2J1
UBQLN1
UBQLN2
UBQLN4
UGGT1
UPF1
UPF2
USP13
UTRN
WDR1
WDR11
WDR6
WFS1
XXYLT1
YLPM1
ZMPSTE24
ZMYND8
